# Supplementary material for: G-Pro bot: a GraphRAG-powered GIS (Geographical information system) chatbot
Source: PeerJ journal article supplement (doi:10.7717/peerj-cs.3520), 2026-01-26
Supplement: questionnaire_result_valid_GIS_Major_Only_English_ver2.xlsx [file questionnaire_result_valid_GIS_Major_Only_English_ver2.xlsx]

## Sheet: questionnaire_result_original_E
No.	Source	What is your role?	What is your major?	Other Major	Q1-Comprehensiveness	Q1-Diversity	Q1-Empowerment	Q1-Directness	Q2-Comprehensiveness	Q2-Diversity	Q2-Empowerment	Q2-Directness	Q3-Comprehensiveness	Q3-Diversity	Q3-Empowerment	Q3-Directness	Q4-Comprehensiveness	Q4-Diversity	Q4-Empowerment	Q4-Directness	Q5-Comprehensiveness	Q5-Diversity	Q5-Empowerment	Q5-Directness	Q6-Comprehensiveness	Q6-Diversity	Q6-Empowerment	Q6-Directness	Q7-Comprehensiveness	Q7-Diversity	Q7-Empowerment	Q7-Directness	Q8-Comprehensiveness	Q8-Diversity	Q8-Empowerment	Q8-Directness	Q9-Comprehensiveness	Q9-Diversity	Q9-Empowerment	Q9-Directness	Q10-Comprehensiveness	Q10-Diversity	Q10-Empowerment	Q10-Directness	Q11-Comprehensiveness	Q11-Diversity	Q11-Empowerment	Q11-Directness	Q12-Comprehensiveness
2	WeChat	Master's Student (3rd Year)	Cartography and Geographic Information System		A	A	A	C	A	A	A	C	A	A	C	C	A	C	C	A	A	A	C	A	C	C	C	A	A	C	A	B	A	B	C	C	C	C	A	A	C	C	C	A	C	C	C	A	A
3		Master's Student (3rd Year)	Cartography and Geographic Information System		C	C	C	C	C	C	C	A	C	C	C	C	A	A	C	B	C	C	C	C	C	C	C	B	C	C	C	C	C	C	C	C	C	C	C	A	C	C	C	C	C	C	C	C	C
4	WeChat	Master's Student (2nd Year)	Cartography and Geographic Information System		C	A	A	A	A	A	A	A	C	C	C	C	C	C	C	C	A	A	A	A	C	C	C	C	C	C	C	C	A	A	A	A	C	C	C	C	A	A	A	A	A	A	C	B	C
13	WeChat	Undergraduate	Other (Please specify)	Geographic Information Science (GIScience)	C	B	C	A	A	B	A	C	B	A	C	B	A	C	B	C	A	B	C	A	A	B	B	C	B	C	A	A	B	C	A	B	A	B	C	A	A	B	A	C	B	B	C	C	A
14		Undergraduate	Other (Please specify)	Geographic Information Science (GIScience)	C	C	A	B	C	C	C	B	C	C	C	C	A	C	B	A	C	C	C	B	C	C	C	B	C	C	C	B	C	C	A	B	C	C	C	B	A	A	A	B	A	C	C	A	A
15	WeChat	Undergraduate	Other (Please specify)	Geographic Information Science (GIScience)	C	C	A	A	C	C	C	B	C	C	C	A	A	C	C	A	C	C	C	B	A	A	C	B	C	A	A	A	C	A	C	A	C	A	A	A	A	A	A	A	A	A	A	A	C
16	WeChat	Undergraduate	Other (Please specify)	Geographic Information Science (GIScience)	A	C	C	B	C	C	C	B	B	C	C	A	C	C	C	B	C	A	A	B	C	C	C	B	C	C	C	B	C	C	C	B	C	C	C	B	C	C	C	B	A	A	C	B	A
17	WeChat	Undergraduate	Other (Please specify)	Geographic Information Science (GIScience)	C	A	A	B	C	C	A	B	C	A	B	A	C	C	A	B	C	A	C	B	C	C	A	A	C	C	A	B	A	C	A	B	C	C	A	A	A	A	C	C	A	A	C	A	A
18	WeChat	Undergraduate	Other (Please specify)	Geographic Information Science (GIScience)	C	C	A	B	C	C	C	C	C	C	C	C	C	C	C	C	C	C	A	C	C	C	C	C	C	C	C	C	C	C	C	C	C	C	C	C	C	C	C	C	C	C	C	C	C
19	WeChat	Undergraduate	Other (Please specify)	Geographic Information Science (GIScience)	A	A	C	C	C	C	C	A	C	C	B	B	A	C	A	B	A	A	C	A	A	A	A	A	A	A	A	A	A	A	A	A	C	C	C	C	A	A	A	A	A	A	A	B	C
20	WeChat	Undergraduate	Other (Please specify)	Geographic Information Science (GIScience)	C	C	C	B	C	C	C	B	B	C	B	A	C	C	B	B	C	C	B	B	A	B	A	A	C	A	C	B	C	A	C	A	C	C	C	A	C	A	C	A	A	A	C	A	A
21	WeChat	Undergraduate	Other (Please specify)	Geographic Information Science (GIScience)	C	C	C	B	C	C	A	B	C	C	A	B	C	C	C	A	C	C	C	B	C	A	B	B	C	C	A	A	A	C	C	A	C	C	C	A	C	C	C	A	A	A	A	A	A
23	WeChat	Undergraduate	Other (Please specify)	Geographic Information Science (GIScience)	C	C	A	A	C	C	A	B	C	C	B	B	C	C	A	B	C	C	A	B	C	C	B	B	C	C	A	B	C	C	A	B	C	C	B	B	C	C	A	A	C	C	B	B	C
25	WeChat	Undergraduate	Other (Please specify)	Geographic Information Science (GIScience)	C	C	C	B	C	C	C	B	C	C	B	A	C	A	C	B	A	C	C	B	C	C	C	B	C	C	A	B	A	A	A	B	C	A	A	B	C	C	A	B	A	A	C	B	C
26	WeChat	Undergraduate	Other (Please specify)	Geographic Information Science (GIScience)	A	C	A	B	C	C	C	B	B	B	B	A	A	A	C	B	A	A	A	A	A	A	A	A	C	C	C	B	C	C	A	B	C	C	A	B	A	C	A	B	C	C	C	B	A
27	WeChat	Undergraduate	Other (Please specify)	Geographic Information Science (GIScience)	C	C	C	B	C	C	C	B	C	C	C	B	C	C	C	B	C	A	C	C	C	C	C	B	C	C	C	B	C	C	C	C	C	C	C	C	C	C	C	C	C	C	C	C	C
30	WeChat	Undergraduate	Other (Please specify)	Geographic Information Science (GIScience)	C	C	C	B	C	C	A	B	C	C	A	C	A	A	C	B	A	A	A	B	C	C	C	A	C	C	C	B	A	A	A	B	C	C	C	A	A	C	C	B	A	A	A	A	C
32	WeChat	Undergraduate	Other (Please specify)	Geographic Information Science (GIScience)	B	B	A	B	B	B	A	B	B	B	A	B	A	A	B	A	A	B	C	A	A	B	A	B	A	A	A	B	A	B	A	B	A	A	B	A	A	B	A	A	A	B	A	B	A
34	WeChat	Master's Student (3rd Year)	Cartography and Geographic Information System		C	C	C	A	C	C	C	C	C	C	C	A	C	C	C	A	C	C	C	B	C	C	C	A	C	C	C	B	C	C	C	C	C	C	C	C	C	C	C	C	C	C	C	C	C
36	WeChat	Master's Student (3rd Year)	Cartography and Geographic Information System		C	C	C	B	C	C	A	B	A	C	C	B	A	C	C	B	B	C	A	C	C	B	C	A	C	C	C	C	C	C	C	C	B	A	C	C	A	B	C	C	B	C	C	C	C
37	WeChat	Master's Student (3rd Year)	Cartography and Geographic Information System		C	C	C	A	C	C	C	C	C	C	C	B	C	C	A	A	C	C	C	C	C	C	C	B	C	C	C	C	C	C	C	C	C	C	C	C	C	C	C	B	C	C	C	B	C
38	WeChat	Master's Student (3rd Year)	Cartography and Geographic Information System		C	C	C	C	C	C	C	B	C	C	C	C	A	A	C	B	C	C	C	C	C	C	C	B	C	C	C	B	C	C	C	C	C	C	C	C	C	C	C	B	C	C	C	B	C
39	WeChat	Master's Student (3rd Year)	Cartography and Geographic Information System		C	C	C	B	C	C	C	B	C	C	C	B	C	C	C	B	C	C	C	A	C	C	C	C	C	C	C	C	C	C	C	C	C	C	C	C	C	C	C	B	C	B	C	C	A
40		Master's Student (3rd Year)	Cartography and Geographic Information System		C	C	C	C	C	C	C	B	C	C	C	C	C	C	C	C	C	C	C	C	C	C	C	C	C	C	C	C	C	C	C	B	C	C	C	C	C	C	C	C	C	C	C	C	C
42	WeChat	Undergraduate	Other (Please specify)	Geographic Information Science (GIScience)	C	C	A	B	C	C	C	B	C	A	C	B	A	C	C	B	C	A	A	B	A	A	C	B	A	A	C	B	C	A	C	B	A	C	C	B	C	A	C	B	A	A	A	B	C
44	WeChat	Geography-related Industry Practitioner	Cartography and Geographic Information System		C	C	A	B	B	A	B	C	C	A	A	C	C	B	A	B	A	A	A	A	B	B	A	C	A	C	A	A	C	B	A	C	A	B	C	A	B	A	B	C	B	B	A	C	B
51	WeChat	Environmental Practitioner	Cartography and Geographic Information System		C	A	C	B	C	C	C	C	C	C	C	B	C	C	C	A	A	A	A	A	A	A	C	A	A	C	C	B	A	C	C	B	C	C	C	A	C	C	C	A	C	C	C	B	A
52	WeChat	Undergraduate	Other (Please specify)	Geographic Information Science (GIScience)	A	B	A	B	B	C	C	B	B	B	C	C	A	A	C	B	B	B	C	B	C	B	B	C	B	C	B	C	B	A	A	C	C	C	A	B	A	C	B	B	B	B	C	C	C
[truncated: 51 more columns]
