# Supplementary material for: G-Pro bot: a GraphRAG-powered GIS (Geographical information system) chatbot
Source: PeerJ journal article supplement (doi:10.7717/peerj-cs.3520), 2026-01-26
Supplement: Response_Comparison.docx [file Response_Comparison.docx]

**Question 1：What are spatial analysis and geospatial analysis? Is there any difference**

**between these terms?**

**Understanding Spatial Analysis and Geospatial Analysis**

Spatial analysis and geospatial analysis are two related but distinct concepts that have been extensively studied and applied in various fields. While they share some similarities, there are key differences between the two.

**Definition of Spatial Analysis**

Spatial analysis refers to the process of analyzing data that is associated with geographic locations or spatial relationships [Data: Reports (2, 7, 34, +more)]. It involves using statistical and mathematical techniques to understand patterns, trends, and relationships in spatial data. Spatial analysis can be performed using various methods and tools, including geographic information systems (GIS), remote sensing, and spatial statistics [Data: Reports (6, 7)].

**Definition of Geospatial Analysis**

Geospatial analysis is a broader term that encompasses spatial analysis as one of its components [Data: Reports (938, 938)]. It involves the study of geographically referenced data to understand relationships between different geographic locations and how they interact with each other. Geospatial analysis may involve the use of spatial autocorrelation, spatial regression, and other statistical techniques to analyze and interpret geospatial data [Data: Reports (6)].

**Key Differences**

While both terms are often used interchangeably, there is a subtle difference in connotation or emphasis between them. Spatial analysis tends to focus on the analysis of spatial relationships within a specific geographic area, whereas geospatial analysis takes a more holistic approach by considering the interactions and relationships between different geographic locations [Data: Reports (6)].

**Applications**

Both spatial analysis and geospatial analysis have many practical applications in fields such as urban planning, environmental science, public health, emergency response, and more [Data: Reports (9, 10)]. They can be used to identify patterns and trends in data that may not be immediately apparent through other methods.

**Evolution of the Field**

It's worth noting that the field of spatial analysis and geospatial analysis is constantly evolving, with new techniques and tools being developed all the time. As such, it may be difficult to pin down a precise definition or distinction between these two terms [Data: Reports (7)].

In conclusion, while there are some differences between spatial analysis and geospatial analysis, they share many similarities and are often used interchangeably in practice. The choice of term may depend on the specific context or discipline being referred to.

Understanding Spatial Analysis and Geospatial Analysis

Spatial analysis and geospatial analysis are two related but distinct concepts that have been extensively studied and applied in various fields.

Definition of Spatial Analysis

Spatial analysis refers to the process of analyzing data associated with geographic locations or spatial relationships [Data: Reports (2, 7, 34, +more)]. It uses statistical and mathematical techniques to understand patterns, trends, and relationships in spatial data. Spatial analysis can be performed using methods and tools including geographic information systems (GIS), remote sensing, and spatial statistics [Data: Reports (6, 7)].

Definition of Geospatial Analysis

Geospatial analysis is a broader term that encompasses spatial analysis as one component [Data: Reports (938, 938)]. It studies geographically referenced data to understand relationships between different locations and their interactions. Geospatial analysis may involve spatial autocorrelation, spatial regression, and other statistical techniques [Data: Reports (6)].

Key Differences

While often used interchangeably, spatial analysis focuses on spatial relationships within a specific area, whereas geospatial analysis considers interactions between different locations [Data: Reports (6)].

Applications

Both spatial analysis and geospatial analysis have practical applications in urban planning, environmental science, public health, emergency response, and more [Data: Reports (9, 10)]. They identify patterns and trends not immediately apparent through other methods.

Evolution of the Field

The field is constantly evolving with new techniques and tools, making precise definitions or distinctions difficult [Data: Reports (7)].

In conclusion, while there are differences between spatial analysis and geospatial analysis, they share many similarities and are often used interchangeably. The choice of term depends on context or discipline.

**Question 2：What is classification of measurement levels?**

**Classification of Measurement Levels**

=====================================

Measurement levels are a fundamental concept in statistics that determine how data should be analyzed and interpreted. There are four main types of measurement levels: nominal, ordinal, interval, and ratio.

**Nominal Scales**

-----------------

Nominal scales are used to categorize data into distinct groups without any inherent order or ranking. Examples include:

* Gender (male/female)

* Nationality (country of origin)

* Brand names

These categories do not have a natural order or hierarchy, and mathematical operations cannot be performed on them.

**Ordinal Scales**

-----------------

Ordinal scales are used to categorize data into distinct groups with an inherent order or ranking. Examples include:

* Educational levels (high school, college, graduate degree)

* Income categories (low, medium, high)

These categories have a natural order or hierarchy, but the intervals between them are not equal.

**Interval Scales**

------------------

Interval scales are used to measure data with equal intervals between consecutive levels. Examples include:

* Temperature in Celsius or Fahrenheit

* Time (hours, minutes, seconds)

These categories have equal intervals between them, but there is no true zero point.

**Ratio Scales**

----------------

Ratio scales are used to measure data with a true zero point and equal intervals between consecutive levels. Examples include:

* Weight

* Height

These categories have a true zero point and equal intervals between them, making them suitable for mathematical operations.

**Implications**

---------------

The classification of measurement levels is crucial in statistics as it determines the type of analysis that can be performed on the data. Nominal scales are often used for categorical variables, while interval and ratio scales are used for continuous variables. Understanding the measurement level of a variable is essential to ensure accurate and meaningful results.

**Conclusion**

----------

In conclusion, the classification of measurement levels is a fundamental concept in statistics that determines how data should be analyzed and interpreted. By understanding the different types of measurement levels (nominal, ordinal, interval, and ratio), researchers can choose the appropriate analysis techniques and ensure accurate and meaningful results.

Classification of Measurement Levels

Measurement levels are a fundamental concept in statistics that determine how data should be analyzed and interpreted. There are four main types: nominal, ordinal, interval, and ratio.

Nominal Scales

Nominal scales categorize data into distinct groups without inherent order or ranking, such as gender (male/female), nationality, or brand names. These categories lack hierarchy, and mathematical operations cannot be applied.

Ordinal Scales

Ordinal scales categorize data with an inherent order or ranking, such as educational levels (high school, college, graduate degree) or income categories (low, medium, high). The categories have a natural order, but unequal intervals.

Interval Scales

Interval scales measure data with equal intervals but no true zero point, such as temperature in Celsius or Fahrenheit and time (hours, minutes, seconds).

Ratio Scales

Ratio scales measure data with equal intervals and a true zero point, such as weight and height, allowing full mathematical operations.

Implications

The classification of measurement levels determines the appropriate type of statistical analysis. Nominal scales apply to categorical variables, while interval and ratio scales apply to continuous variables. Recognizing a variable’s measurement level ensures accurate and meaningful results.

Conclusion

In summary, understanding the four measurement levels—nominal, ordinal, interval, and ratio—helps researchers select suitable analysis techniques and achieve reliable outcomes.

**Question 3：Introduce Kriging and all members of the Kriging family.**

**Introduction to Kriging**

==========================

Kriging is a geostatistical method used for interpolation, which estimates the value of a variable at an unobserved location based on the values of observed locations. It is widely used in various fields such as geography, geology, and environmental science.

**Members of the Kriging Family**

-------------------------------

The Kriging family consists of several members, each with its own unique characteristics and applications:

### 1. Ordinary Kriging (OK)

---------------------------

Ordinary Kriging is a type of Kriging that estimates the value at an unobserved location based on the values of observed locations without assuming any underlying process. It is widely used for interpolation and has been applied in various fields such as geography, geology, and environmental science.

### 2. Universal Kriging (UK)

---------------------------

Universal Kriging is a generalization of Ordinary Kriging that allows for non-stationary covariance functions and can handle multiple variables. It assumes the underlying process has a known mean and variance.

### 3. Co-Kriging

----------------

Co-Kriging is a type of Kriging that combines multiple variables to estimate the value at an unobserved location. It estimates the value of one variable based on the values of another related variable.

### Other Members

------------------

Other members of the Kriging family include Simple Kriging and Indicator Kriging. However, these methods are not as widely used as Ordinary Kriging, Universal Kriging, and Co-Kriging.

**Conclusion**

----------

In conclusion, Kriging is a powerful geostatistical method for interpolation that has been applied in various fields. The Kriging family consists of several members, each with its own unique characteristics and applications. Understanding the different types of Kriging is essential for selecting the most appropriate method for a given problem.

Introduction to Kriging

Kriging is a geostatistical interpolation method that estimates the value of a variable at an unobserved location based on observed data. It is widely applied in geography, geology, and environmental science.

Members of the Kriging Family

The Kriging family includes several variants, each with specific characteristics and applications.

1. Ordinary Kriging (OK)

Ordinary Kriging estimates values at unobserved locations using nearby observations without assuming an underlying trend. It is the most commonly used form, applied broadly in geography, geology, and environmental science.

2. Universal Kriging (UK)

Universal Kriging generalizes Ordinary Kriging by allowing non-stationary covariance functions and handling multiple variables. It assumes the underlying process has a known mean and variance.

3. Co-Kriging

Co-Kriging combines multiple correlated variables to improve estimation accuracy. It predicts the value of one variable using information from another related variable.

Other Members

Other types include Simple Kriging and Indicator Kriging, though they are less widely applied than OK, UK, and Co-Kriging.

Conclusion

Kriging is a powerful interpolation technique with multiple variants suited to different data structures and assumptions. Understanding these types helps in choosing the most appropriate method for specific applications.

**Question 4：What is Edge Effect and how to counter it?**

**Edge Effect: Understanding its Causes and Consequences**

Edge effect refers to the changes that occur at the boundary between two different environments or ecosystems, such as a forest and a grassland. These changes can have significant impacts on the species living in these areas, leading to altered population dynamics, behavior, and even extinction.

### Causes of Edge Effect

The causes of edge effect are varied and complex, but some of the main factors include:

* **Habitat fragmentation**: The division of habitats into smaller patches, leading to reduced habitat quality and increased isolation.

* **Edge-related microclimates**: Changes in temperature, humidity, and light levels at the edge of a habitat, which can be detrimental to certain species.

* **Increased predation**: The presence of predators at the edge of a habitat can lead to increased predation pressure on prey species.

### Consequences of Edge Effect

The consequences of edge effect are far-reaching and can have significant impacts on ecosystems. Some of the main effects include:

* **Species extinction**: The loss of species due to altered population dynamics and reduced habitat quality.

* **Changes in ecosystem processes**: Altered nutrient cycling, water flow, and other ecosystem processes can occur at the edge of a habitat.

* **Reduced biodiversity**: The reduction of species richness and evenness at the edge of a habitat.

### Countering Edge Effect

To counter edge effect, several strategies can be employed:

* **Habitat restoration**: Restoring degraded or fragmented habitats to improve their quality and connectivity.

* **Edge management**: Managing the edge of a habitat to reduce its impact on species living in it. This can include techniques such as thinning vegetation, pruning trees, or creating buffer strips.

* **Conservation planning**: Developing conservation plans that take into account the impacts of edge effect and aim to mitigate them.

Edge Effect: Understanding its Causes and Consequences

Edge effect refers to the changes that occur at the boundary between two different environments or ecosystems, such as between a forest and a grassland. These changes can significantly affect species in these areas, altering population dynamics, behavior, and even leading to extinction.

Causes of Edge Effect

Main causes of edge effect include:

Habitat fragmentation – Division of habitats into smaller patches, reducing quality and increasing isolation.

Edge-related microclimates – Variations in temperature, humidity, and light at habitat boundaries that may harm sensitive species.

Increased predation – Higher predator presence at edges raises predation pressure on prey species.

Consequences of Edge Effect

Edge effects can greatly influence ecosystems through:

Species extinction – Population changes and degraded habitats may drive species loss.

Changes in ecosystem processes – Altered nutrient cycling, water flow, and other processes occur near edges.

Reduced biodiversity – Species richness and evenness often decline at habitat boundaries.

Countering Edge Effect

Mitigation strategies include:

Habitat restoration – Reconnecting or improving fragmented habitats.

Edge management – Reducing edge impacts through vegetation thinning, pruning, or buffer strips.

Conservation planning – Incorporating edge effects into management and restoration plans.

**Question 5：what are uses of GIS?**

**Uses of Geographic Information Systems (GIS)**

GIS has a wide range of applications across various fields, including:

### 1. **Transportation Planning**

* Analyze traffic flow, road network optimization, and public transit systems [Data: Reports (13, 14, 15)]

* Study transportation networks, including routes, traffic patterns, and infrastructure development [Data: Reports (3, 4)]

### 2. **Environmental Management**

* Calculate watershed areas for rivers [Data: Relationships (4881)]

* Analyze plant distribution patterns and root systems [Data: Reports (7360)]

### 3. **Urban Planning**

* Map and analyze population density to identify areas of high population growth and resource allocation needs [Data: Entities (9669), Data: Reports (9047)]

* Study geological structures and processes in the field of geology [Data: Reports (5, 6)]

### 4. **Disaster Response and Recovery**

* Use GIS for disaster response and recovery efforts [Data: Reports (12, 13)]

* Create interactive maps and web applications for public engagement and education [Data: Reports (13, 14, 15)]

### 5. **Education and Research**

* Teach geographic concepts and skills in educational settings [Data: Reports (10, 11)]

* Analyze relationships between different entities in a system, such as plant distribution and root systems [Data: Reports (7360)]

### 6. **Data Management and Storage**

* Use GIS for data management and storage in communities [Data: Reports (923)]

* Collaborate and coordinate between entities, such as the PLANNING DEPARTMENT and CHAPTER5 DATA [Data: Reports (923)]

These are just a few examples of the many uses of GIS. The technology has far-reaching applications across various fields, making it an essential tool for data analysis, visualization, and decision-making.

**Note:** This response is based on the provided analysts' reports, which have been ranked in descending order of importance. The information presented here represents the most relevant and accurate findings from these reports.

Uses of Geographic Information Systems (GIS)

GIS has diverse applications across multiple fields, supporting analysis, visualization, and decision-making.

1. Transportation Planning

Analyze traffic flow, optimize road networks, and improve public transit systems [Data: Reports (13, 14, 15)].

Study routes, traffic patterns, and infrastructure development [Data: Reports (3, 4)].

2. Environmental Management

Calculate watershed areas for rivers [Data: Relationships (4881)].

Analyze plant distribution and root systems [Data: Reports (7360)].

3. Urban Planning

Map and analyze population density to identify growth areas and resource needs [Data: Entities (9669), Data: Reports (9047)].

Study geological structures and processes [Data: Reports (5, 6)].

4. Disaster Response and Recovery

Support disaster response and recovery through spatial analysis [Data: Reports (12, 13)].

Develop interactive maps and web applications for public awareness [Data: Reports (13, 14, 15)].

5. Education and Research

Teach geographic concepts and analytical skills [Data: Reports (10, 11)].

Examine relationships between entities such as plant distribution and root systems [Data: Reports (7360)].

6. Data Management and Storage

Use GIS for community data storage and management [Data: Reports (923)].

Facilitate collaboration among entities such as the Planning Department and Chapter5 Data [Data: Reports (923)].

These examples highlight GIS as an essential tool with broad applications across disciplines.

Note: This response is based on analysts’ reports ranked by importance, representing the most relevant findings.

**Question 6：List the examples of Applications of Geographic Information Systems in Urban Planning and Management.**

### Applications of Geographic Information Systems in Urban Planning and Management ###

Geographic Information Systems (GIS) play a crucial role in urban planning and management by providing insights into various aspects of city development, infrastructure, and services. The following are some key applications of GIS in this field:

#### 1. Population Density Analysis ####

Creating a population density field named POP_DEN is an essential task in urban planning and management. This helps in understanding the distribution of population within the city, which can inform decisions on resource allocation, infrastructure development, and service provision.

#### 2. Urban Economic Analysis ####

GIS can be applied to analyze the economic impact of urban development on the environment and make informed decisions about sustainable development. This includes analyzing the impact of different development scenarios on the city's infrastructure and services.

#### 3. Environmental Impact Assessment ####

Urban planners can use GIS to evaluate the environmental impact of development projects and identify areas for sustainable development. This involves analyzing the potential effects of development on the environment, including pollution, climate change, and natural disasters.

#### 4. Emergency Response Planning and Disaster Risk Reduction ####

GIS is used in urban management for tasks like emergency response planning and disaster risk reduction. This includes creating maps and models that simulate the impact of different development scenarios on the city's infrastructure and services.

#### 5. Smart City Development ####

GIS can aid in the creation of smart cities by integrating data from various sources, including sensors, social media, and IoT devices. This enables urban managers to make informed decisions about resource allocation, infrastructure development, and service provision.

### Key Points and Implications ###

* GIS is a powerful tool for urban planning and management, providing insights into population density, economic analysis, environmental impact assessment, emergency response planning, and disaster risk reduction.

* Urban planners can use GIS to create maps and models that simulate the impact of different development scenarios on the city's infrastructure and services.

* GIS can aid in the creation of smart cities by integrating data from various sources.

* The use of GIS in urban planning and management can help reduce costs and optimize resource allocation.

Applications of Geographic Information Systems in Urban Planning and Management

Geographic Information Systems (GIS) play a crucial role in urban planning and management by providing insights into city development, infrastructure, and services. Key applications include:

1. Population Density Analysis

Creating a population density field (POP_DEN) helps visualize population distribution, supporting decisions on resource allocation, infrastructure development, and service provision.

2. Urban Economic Analysis

GIS supports analysis of the economic impact of urban development and sustainable growth, including evaluating how different development scenarios affect city infrastructure and services.

3. Environmental Impact Assessment

Planners use GIS to assess environmental effects of urban projects and identify sustainable development areas by analyzing pollution, climate change, and disaster risks.

4. Emergency Response Planning and Disaster Risk Reduction

GIS enables emergency response planning through maps and models that simulate the effects of various development scenarios on urban systems.

5. Smart City Development

GIS contributes to smart city initiatives by integrating data from sensors, social media, and IoT devices, enhancing decision-making for infrastructure, resource management, and service delivery.

Key Points and Implications

GIS provides essential insights for population analysis, economic evaluation, environmental assessment, and disaster planning.

It helps simulate development impacts on infrastructure and services.

Integration of diverse data sources supports smart city development.

Overall, GIS use in urban planning enhances efficiency, sustainability, and resource optimization.

**Question 7：What are the applications of GIS in the field of crime?**

**Applications of GIS in Crime Analysis**

Geographic Information Systems (GIS) have become an essential tool in crime analysis, providing valuable insights to law enforcement agencies and policymakers. The following sections summarize the key applications of GIS in crime analysis.

### Crime Pattern Identification and Mapping

GIS enables the identification of crime hotspots and patterns, allowing for targeted interventions and resource allocation. Analysts have used GIS to map crime locations, types, and frequencies, revealing correlations between crime and demographic factors such as poverty, unemployment, and population density.

### Crime Scene Investigation and Reconstruction

GIS is used in forensic analysis to reconstruct crime scenes, analyze evidence, and piece together events. This helps investigators to identify suspects, track their movements, and gather evidence.

### Crime Prevention and Reduction Strategies

GIS can be used to identify areas with high levels of crime and poverty, allowing for targeted interventions and resource allocation. Analysts have also used GIS to develop strategies for prevention and intervention, such as community policing and crime prevention programs.

### Communication and Public Awareness

GIS can help law enforcement agencies communicate with the public and provide information about crime trends and safety concerns. This enhances transparency and builds trust between law enforcement and the community.

### Limitations and Future Directions

While GIS has shown promise in crime analysis, there is limited evidence on its effectiveness in preventing and reducing crime. Further research is needed to fully understand the potential of GIS in this field.

In conclusion, GIS has numerous applications in crime analysis, from identifying crime patterns and hotspots to reconstructing crime scenes and developing prevention strategies. However, more research is required to fully harness its potential and address concerns around privacy and data security.

Applications of GIS in Crime Analysis

Geographic Information Systems (GIS) are essential tools in crime analysis, offering valuable insights for law enforcement and policymakers.

Crime Pattern Identification and Mapping

GIS identifies crime hotspots and spatial patterns, enabling targeted interventions and efficient resource allocation. Mapping crime locations, types, and frequencies helps reveal correlations with demographic factors such as poverty, unemployment, and population density.

Crime Scene Investigation and Reconstruction

In forensic work, GIS assists in reconstructing crime scenes, analyzing evidence, and tracking suspect movements, aiding in investigation and case resolution.

Crime Prevention and Reduction Strategies

GIS helps pinpoint high-crime and high-poverty areas, guiding prevention strategies such as community policing and focused intervention programs.

Communication and Public Awareness

Law enforcement agencies use GIS to share crime data and trends with the public, improving transparency and strengthening community trust.

Limitations and Future Directions

Although GIS enhances crime analysis and strategy development, its direct impact on crime reduction remains under study. Further research is needed to maximize its potential and address issues of privacy and data security.

In summary, GIS supports crime mapping, investigation, prevention, and public communication, but ongoing evaluation is essential to fully realize its benefits.

**Question 8：What is the use of GIS in various fields of Oceanography?**

**The Use of GIS in Various Fields of Oceanography**

GIS (Geographic Information System) plays a crucial role in various fields of oceanography, enabling researchers to collect, analyze, and visualize large datasets. The use of GIS in oceanography has numerous applications, including:

### 1. **Ocean Climate Modeling**

GIS is used to study the interactions between the oceans and atmosphere, helping researchers understand the impacts of climate change on ocean circulation, sea level rise, and other phenomena.

### 2. **Coastal Zone Management**

GIS is employed in coastal zone management to assess the impact of human activities on coastal ecosystems, track fish populations, monitor fishing activities, and develop sustainable fishing practices.

### 3. **Underwater Exploration and Mapping**

GIS is used in underwater exploration and mapping to create detailed maps of seafloor topography and identify new areas for scientific research.

### 4. **Ocean Acidification Research**

GIS is used to study the impacts of changing ocean chemistry on marine ecosystems, helping scientists understand the complex relationships between ocean acidification and other climate change factors.

### 5. **Coastal Erosion Modeling**

GIS is used in coastal erosion modeling to predict and mitigate the impact of sea level rise on coastal communities.

### 6. **Fisheries Management**

GIS is used in fisheries management to track fish populations, monitor fishing activities, and develop sustainable fishing practices.

The use of GIS in oceanography has numerous benefits, including:

* Improved data visualization and analysis

* Enhanced understanding of complex relationships between oceanic and atmospheric processes

* Better management of coastal ecosystems and fisheries

* Identification of new areas for scientific research

Overall, the application of GIS in various fields of oceanography is crucial for advancing our understanding of the world's oceans and mitigating the impacts of climate change.”

The Use of GIS in Various Fields of Oceanography

Geographic Information Systems (GIS) play a vital role in oceanography, supporting data collection, analysis, and visualization across multiple research areas.

1. Ocean Climate Modeling

GIS helps study ocean–atmosphere interactions, improving understanding of climate change impacts such as ocean circulation shifts and sea level rise.

2. Coastal Zone Management

GIS assesses human impacts on coastal ecosystems, tracks fish populations, monitors fishing activities, and supports sustainable coastal management.

3. Underwater Exploration and Mapping

GIS creates detailed seafloor maps, aiding underwater exploration and identifying new research areas.

4. Ocean Acidification Research

GIS supports analysis of changing ocean chemistry and its effects on marine ecosystems, revealing links between acidification and climate factors.

5. Coastal Erosion Modeling

GIS predicts and mitigates coastal erosion and sea level rise impacts on vulnerable communities.

6. Fisheries Management

GIS monitors fish populations and fishing activity to guide sustainable fisheries management.

Benefits of GIS in Oceanography

Enhanced visualization and analysis of marine data.

Deeper understanding of oceanic and atmospheric processes.

Improved coastal and fisheries management.

Identification of new research opportunities.

Overall, GIS applications in oceanography are essential for advancing ocean science and addressing the challenges posed by climate change.

**Question 9：List the FISHERIES GIS TOOLS AND INITIATIVES.**

### Geographic Information Systems (GIS) are widely used in fisheries (inland and marine) and aquaculture fields, with many worldwide organizations adopting them for database and visualization methods in recent years. The Food and Agriculture Organization of the United Nations (FAO) is a key driver in the application of GIS in these areas.

The FAO developed the Fisheries Global Information System (FIGIS), an Internet-based interactive system designed to provide policymakers with timely and reliable strategic information on fishery status and trends globally. FIGIS will offer spatial and other information on aquatic species, marine resources, marine fisheries, and fishing technologies. It aims to support policymakers in shifting towards sustainability-centered management by providing a single entry point to strategic data, information, analyses, and reviews of fisheries issues and trends. The FAO has also established an online worldwide Atlas of Tuna and Billfish Catches, which features excellent GIS maps of fisheries information for these species.

Other significant projects and initiatives include:

NOAA's National Ocean Service: Initiated projects under the Biogeography Programme to develop knowledge and products on living marine resource distributions and ecology. A major focus is on the identification and management of Essential Fish Habitat (EFH), where GIS is extensively used to overlay species distribution with habitat features.

The Fisheries Centre at the University of British Columbia (FC): Provides a wide range of fisheries products, including online publications and software like "Ecopath with Ecosim," which helps construct models of trophic flows in marine and freshwater ecosystems.

The Fisheries Information and Analysis System (FIAS): An ongoing project aimed at strengthening capacities for improved resource management in Northwest Africa. It includes a GIS module to integrate fisheries-related data and other datasets.

The VIBES Project: An applied research program focused on the viability of exploited pelagic fish resources in the Benguela Ecosystems, producing a GIS as an aid for assessing relationships between the environment, resources, and exploitation.

The International Research Institute for Climate Prediction: Utilizes satellite information to study oceanographic conditions off the coast of Peru and compare observations with the Peruvian catch of small pelagic fish, aiming to quantify the impact of El Nino conditions on fish catch.

The Great Lake Fisheries GIS: A well-established monitoring and management system for fisheries resources of the Great Lakes, linking a 10x10 inch statistical "rectangle" monitoring system to an extensive GIS database.

GIS applications in a European context: The Common Fisheries Policy (CFP) of the European Communities is integrating environmental considerations into fisheries policy-making, where GIS use is profound. MarLIN provides comprehensive information on marine habitats, communities, and species, developing GIS databases for identifying "sensitivity" and "recoverability". The Fisheries GIS Unit (Canterbury Christ Church University College, UK) developed FISHCAM, an electronic fisheries data log system based on GIS, used globally.

The FAO COPEMED Project: Highlights the significant role of GIS in fisheries management, emphasizing the importance of a spatial approach for decision-makers and the need to link GIS with other database management systems and numerical models.

Overall, GIS is increasingly applied in the fisheries sector, playing a crucial role in data management, visualization, model building, policy formulation, and resource management.

Applications of GIS in Fisheries and Aquaculture

Geographic Information Systems (GIS) are increasingly used in both inland and marine fisheries and aquaculture, with many organizations adopting them for database management and visualization. The Food and Agriculture Organization of the United Nations (FAO) has been a key promoter of GIS in this field.

FAO Initiatives

The FAO developed the Fisheries Global Information System (FIGIS), an Internet-based interactive platform providing policymakers with strategic information on global fishery status and trends. FIGIS offers spatial and analytical data on aquatic species, marine resources, and fishing technologies to support sustainability-centered management. The FAO also created an online Atlas of Tuna and Billfish Catches, featuring GIS-based maps of global fisheries data.

Other Major Projects

NOAA’s National Ocean Service – Uses GIS within the Biogeography Programme to identify and manage Essential Fish Habitat (EFH) by overlaying species distributions with habitat features.

Fisheries Centre, University of British Columbia (FC) – Produces fisheries models and tools such as Ecopath with Ecosim to simulate trophic flows in marine and freshwater systems.

Fisheries Information and Analysis System (FIAS) – Enhances fisheries resource management in Northwest Africa with an integrated GIS module.

VIBES Project – Studies pelagic fish resources in the Benguela Ecosystems using GIS to analyze environmental–resource–exploitation relationships.

International Research Institute for Climate Prediction – Employs satellite and GIS data to assess El Niño impacts on small pelagic fisheries off Peru.

Great Lakes Fisheries GIS – Provides a GIS-based monitoring and management framework for the Great Lakes fishery resources.

European Applications – Under the Common Fisheries Policy (CFP), GIS supports environmental integration into fisheries policy. Projects include MarLIN, which compiles habitat and species data to assess sensitivity and recoverability, and FISHCAM (Canterbury Christ Church University College), a GIS-based electronic data log system used globally.

FAO COPEMED Project – Highlights GIS as a key decision-support tool linking spatial data with management systems and numerical models.

Conclusion

GIS plays an essential role in modern fisheries and aquaculture by improving data management, visualization, modeling, and sustainable policy formulation. Its integration continues to strengthen resource management and environmental decision-making worldwide.

.

**Question 10：what are the types of data used for surface-water hydrology studies?**

#### Types of Data Used for Surface-Water Hydrology Studies ###

Surface-water hydrology studies involve the collection and analysis of various types of data to understand the characteristics, behavior, and impacts of water bodies. The following are some of the key types of data used in surface-water hydrology studies:

#### 1. Field Measurements ####

Field measurements are essential for collecting data on surface-water hydrology. These datasets may include parameters such as pH, temperature, dissolved oxygen levels, and other physical and chemical characteristics of water bodies [Data: Reports (6, 7)].

#### 2. Streamflow Data ####

Streamflow data is used to measure the flow rate of rivers and streams [Data: Reports (6, 7)]. This type of data is crucial for understanding the hydrological cycle and predicting flood events or droughts.

#### 3. Water Quality Data ####

Water quality data is used to assess the chemical, physical, and biological characteristics of water bodies [Data: Reports (8, 9)].

#### 4. Remote Sensing Data ####

Remote sensing data, such as satellite imagery, may be used to monitor water levels, detect changes in the water cycle, and analyze spatial relationships between cells [Data: Reports (2, 7, +more)]. This type of data is useful for large-scale monitoring and analysis.

#### 5. Census Data ####

Census.gov provides access to official census data, which may be used in surface-water hydrology studies to understand population dynamics and their impact on water resources [Data: Reports (4720)].

### Additional Types of Data ###

Other types of data that may be used in surface-water hydrology studies include:

* Field measurements of water temperature, pH, and other physical and chemical parameters [Data: Reports (1, 3)]

* Kriging technique for advanced data processing and analysis [Data: Reports (7186)]

* LITTORAL ZONE GIS OF LAKE CONSTANCE may have a moderate impact on the community's dynamics in terms of surface-water hydrology studies [Data: Entities (12956), Relationships (1060)]

### Implications ###

The types of data used in surface-water hydrology studies are diverse and depend on the specific research question or goal. Understanding the characteristics, behavior, and impacts of water bodies requires a comprehensive approach that incorporates multiple types of data. The use of remote sensing data, field measurements, and census data can provide valuable insights into the complex relationships between water resources and human activities.

Note that the data references provided are a selection of the most relevant ones mentioned in the analysts' reports. There may be additional data references not included in this response.

Types of Data Used for Surface-Water Hydrology Studies

Surface-water hydrology studies rely on multiple data types to analyze the characteristics, behavior, and impacts of water bodies.

1. Field Measurements

Field measurements provide essential physical and chemical data such as pH, temperature, and dissolved oxygen levels [Data: Reports (6, 7)].

2. Streamflow Data

Streamflow data measure river and stream discharge rates [Data: Reports (6, 7)], supporting hydrological cycle analysis and flood or drought prediction.

3. Water Quality Data

Water quality data assess the chemical, physical, and biological properties of surface waters [Data: Reports (8, 9)].

4. Remote Sensing Data

Satellite imagery and other remote sensing sources monitor water levels, detect hydrological changes, and analyze spatial relationships [Data: Reports (2, 7, +more)], providing large-scale monitoring capability.

5. Census Data

Census.gov data help evaluate population dynamics and their effects on water resources [Data: Reports (4720)].

Additional Data Types

Other sources include:

Additional field measurements of temperature, pH, and related parameters [Data: Reports (1, 3)]

Kriging for advanced spatial analysis [Data: Reports (7186)]

Littoral Zone GIS of Lake Constance, relevant to community-level hydrological dynamics [Data: Entities (12956), Relationships (1060)].

Implications

Surface-water hydrology requires integrating diverse datasets to understand water system behavior and human–environment interactions. Combining field, remote sensing, and census data offers comprehensive insights into water resource dynamics.

Note: The listed references represent the most relevant sources identified in analysts’ reports; additional data references may exist.

**Question 11：I'm mapping floodplain, what kinds of data should I use?**

### Floodplain Mapping Data Requirements ###

To generate an accurate floodplain map, it is essential to integrate various datasets that provide information on the floodplain's morphology, changes over time, and potential flood risks. The following sections summarize the key findings from multiple analysts who focused on different parts of the dataset.

#### 1. Geographic Information Systems (GIS) Software ###

Use GIS software to integrate and analyze the various datasets and create a comprehensive floodplain map.

#### 2. Satellite Imagery and Aerial Photography ###

Satellite imagery and aerial photography can provide visual information on the floodplain's morphology and changes over time. This data type is particularly useful for identifying areas with high water retention capacity.

#### 3. Geological Data ###

Geological data such as soil type and aquifer characteristics can help identify areas with high flood risk. Additionally, geological data like soil moisture can aid in identifying areas with high water-holding capacity.

#### 4. Watershed Analysis ###

The Watershed Tool calculates watershed areas, which are then used to create the Watershed Output. This suggests that understanding and managing watershed areas is crucial for floodplain mapping and may have implications for environmental management and conservation efforts.

#### 5. Spatial Autocorrelation Analysis ###

ANSELIN LOCAL MORAN'S I is a key entity in this community, being a tool used to calculate local spatial autocorrelation of income, which may impact floodplain management.

Floodplain Mapping Data Requirements

Accurate floodplain mapping requires integrating diverse datasets on morphology, temporal changes, and flood risks.

1. Geographic Information Systems (GIS) Software

GIS software is essential for integrating datasets and producing comprehensive floodplain maps.

2. Satellite Imagery and Aerial Photography

Satellite imagery and aerial photos provide visual data on floodplain morphology and temporal changes, helping identify areas with high water retention capacity.

3. Geological Data

Soil type, aquifer characteristics, and soil moisture data aid in identifying high flood-risk areas and zones with significant water-holding capacity.

4. Watershed Analysis

Watershed tools calculate drainage areas used in floodplain mapping, informing environmental management and conservation efforts.

5. Spatial Autocorrelation Analysis

ANSELIN LOCAL MORAN’S I calculates local spatial autocorrelation, which can influence floodplain management decisions.

**Question 12：what is spatial data?Give me some examples of Data Types Included in Spatial Data.**

**What is Spatial Data?**

Spatial data refers to any information that has a geographic location or reference, such as latitude and longitude coordinates. It can be used to represent various types of data, including points, lines, polygons, rasters, and networks.

**Examples of Data Types Included in Spatial Data**

Some common examples of spatial data include:

* Points: Represented by latitude and longitude coordinates, these are used to mark specific locations on a map.

* Lines: Used to represent routes or paths between two points, such as roads or rivers.

* Polygons: Represent areas on a map, such as countries or buildings.

* Rasters: Used to represent continuous data, such as elevation or temperature.

**Common Formats for Storing and Exchanging Spatial Data**

Spatial data can be stored and exchanged in various formats, including:

* Shapefiles

* GeoJSON

* KML

These formats allow for the efficient storage and transfer of spatial data between different systems and applications [Data: Reports (6, 8)].

**Sources of Spatial Data**

Spatial data can be collected from various sources, including:

* GPS devices

* Satellite imagery

* Field observations

It is often used in conjunction with other types of data to provide a more comprehensive understanding of the world [Data: Reports (9, 10)].

**Applications of Spatial Data**

Spatial data has numerous applications across various fields, including:

* Geographic Information Systems (GIS)

* Mapping services

* Location-based services

* Urban planning

* Environmental monitoring

* Emergency response

These applications rely on spatial data to provide insights and make informed decisions [Data: Reports (2, 4)].

**Additional Examples of Spatial Data**

Some additional examples of spatial data include:

* Population density maps

* Climate models

* Traffic patterns

These types of data are used to understand and analyze various aspects of the world, from human populations to environmental phenomena [Data: Reports (+more)].

What is Spatial Data?

Spatial data refers to information with a geographic reference, such as latitude and longitude, representing points, lines, polygons, rasters, or networks.

Examples of Spatial Data

Points: Mark specific locations using coordinates.

Lines: Represent routes or paths, such as roads or rivers.

Polygons: Define areas like countries or buildings.

Rasters: Represent continuous data, e.g., elevation or temperature.

Common Formats

Spatial data can be stored and shared via shapefiles, GeoJSON, or KML [Data: Reports (6, 8)], enabling efficient transfer across systems.

Sources of Spatial Data

Data can be collected from GPS devices, satellite imagery, and field observations, often combined with other datasets for comprehensive analysis [Data: Reports (9, 10)].

Applications

Spatial data supports GIS, mapping services, location-based services, urban planning, environmental monitoring, and emergency response, providing insights for informed decision-making [Data: Reports (2, 4)].

Additional Examples

Other spatial datasets include population density maps, climate models, and traffic patterns, used to analyze human and environmental phenomena [Data: Reports (+more)].

**Question 13：What is Map Projection?**

Map projection is a systematic mathematical method for converting geographic coordinates from the Earth's surface into planar coordinates. Because the Earth's curved surface cannot be flattened into a plane without any distortion, all map projections introduce some form of inaccuracy. These distortions can manifest in terms of shape, area, distance, or direction.

Different map projections are designed to preserve specific properties or minimize certain types of distortion, depending on the map's intended use. For instance:

Conformal Projections: Preserve the accuracy of shapes, meaning that at any point on the map, directions are correct, but areas may be significantly distorted.

Equal-Area Projections: Preserve the accuracy of areas, meaning the proportional area of any region on the map matches its actual area on Earth, but shapes may be distorted.

Equidistant Projections: Preserve the accuracy of distances from one or two central points to all other points, but generally cannot simultaneously maintain true shapes and areas.

Azimuthal Projections: Preserve the accuracy of directions from a central point to all other points.

The choice of map projection is critical in GIS applications because it directly impacts the accuracy of spatial analysis, such as distance calculations, area measurements, and the analysis of spatial relationships between geographic features.

Map Projection

Map projection is a systematic mathematical method to convert geographic coordinates from the Earth's curved surface into planar coordinates. Since flattening the Earth always introduces distortion, all projections affect shape, area, distance, or direction.

Different projections are designed to preserve specific properties or minimize certain distortions:

Conformal Projections: Preserve shapes and local directions, but areas may be distorted.

Equal-Area Projections: Maintain area proportions, though shapes may be altered.

Equidistant Projections: Preserve distances from one or two central points, but cannot fully maintain shapes and areas.

Azimuthal Projections: Preserve directions from a central point to all other points.

Choosing an appropriate map projection is critical in GIS, as it affects the accuracy of spatial analyses, including distance measurements, area calculations, and spatial relationship assessments.

**Question 14：What is Vectorization and Rasterization?**

**Vectorization and Rasterization: A Comprehensive Overview**

Vectorization and rasterization are two fundamental processes used in Geographic Information Systems (GIS) and remote sensing applications to convert data between different formats. Understanding the differences between these two processes is crucial for efficient storage, manipulation, and analysis of spatial data.

### What is Vectorization?

Vectorization is the process of converting raster data into vector format. This involves extracting the spatial features from a raster dataset and representing them as geometric shapes, such as points, lines, or polygons. Vectorization is often preferred for detailed representation of geographic features, allowing for precise measurements and calculations [Data: Reports (1108)].

### What is Rasterization?

Rasterization is the process of converting vector data into raster format. This involves dividing the vector dataset into small cells or pixels to create a grid-based representation. Rasterization is more suitable for large-scale datasets, where precision is not critical, and visualization is the primary goal [Data: Reports (3, 4)].

### Key Points and Implications

* Vectorization preserves the spatial relationships between features, making it ideal for detailed representation of geographic features.

* Rasterization loses some of the precision and flexibility of the original vector data but provides a more suitable format for large-scale datasets and visualization purposes.

* Both vectorization and rasterization are essential processes in GIS and remote sensing applications, enabling efficient storage, manipulation, and analysis of spatial data [Data: Reports (5, 6)].

### Tools and Software

Various tools and software are available for vectorization and rasterization, including ArcGIS, QGIS, and GDAL. These tools provide a range of functionalities for data conversion, manipulation, and analysis [Data: Reports (14933)].

Vectorization and Rasterization: A Comprehensive Overview

Vectorization and rasterization are key processes in GIS and remote sensing for converting data between formats, supporting efficient storage, manipulation, and analysis.

What is Vectorization?

Vectorization converts raster data into vector format, extracting spatial features as points, lines, or polygons. It is preferred for detailed representation, enabling precise measurements and calculations [Data: Reports (1108)].

What is Rasterization?

Rasterization converts vector data into raster format by dividing features into grid cells or pixels. It is suitable for large-scale datasets where visualization is prioritized over precision [Data: Reports (3, 4)].

Key Points and Implications

Vectorization preserves spatial relationships, ideal for detailed feature representation.

Rasterization sacrifices some precision but suits large datasets and visualization.

Both processes are essential for efficient GIS and remote sensing operations [Data: Reports (5, 6)].

Tools and Software

Popular tools for vectorization and rasterization include ArcGIS, QGIS, and GDAL, offering functionalities for data conversion, manipulation, and analysis [Data: Reports (14933)].

**Question 15：What is the location quotient in Spatial Crime Mapping?**

### Location Quotient in Spatial Crime Mapping ###

The location quotient (LQ) is a statistical tool used in spatial crime mapping to analyze the distribution of crimes across different locations and identify areas with unusual patterns or concentrations of crime. It allows researchers to compare the distribution of crimes across different areas and identify areas that are significantly higher or lower than expected.

### Calculating Location Quotient ###

The location quotient can be calculated using various methods, including the simple location quotient and the standardized location quotient. The choice of method depends on the specific research question and data available. The standardization method and z-score method are also used to calculate LQ.

### Limitations of Location Quotient ###

While the location quotient is a useful tool for spatial analysis, it has some limitations. For example, it does not take into account the size of the local area being studied, which can lead to biased results if the area is too small or too large. Additionally, LQ may not provide a complete picture of the underlying causes of crime and should be used in conjunction with other factors such as socioeconomic conditions, demographic characteristics, and environmental factors.

### Applications of Location Quotient ###

The location quotient is often used in conjunction with other spatial analysis techniques to identify hotspots and patterns of crime. It can be used to create maps that show the distribution of crime across different locations, allowing researchers to visualize and understand crime patterns more effectively. The LQ can also be used to identify areas that require targeted interventions or policing strategies.

### Conclusion ###

In conclusion, the location quotient is a useful tool for spatial analysis in crime mapping. It allows researchers to compare the distribution of crimes across different areas and identify areas with unusual patterns or concentrations of crime. While it has some limitations, the LQ can be used in conjunction with other factors to provide a more comprehensive understanding of crime patterns.

Location Quotient in Spatial Crime Mapping

The location quotient (LQ) is a statistical tool used in spatial crime mapping to analyze crime distribution and identify areas with unusually high or low concentrations. It enables comparison of crime patterns across different locations.

Calculating Location Quotient

LQ can be computed using methods such as the simple LQ, standardized LQ, or z-score method, depending on the research question and available data.

Limitations

LQ does not account for the size of the study area, which may bias results if areas are too small or too large. It also does not explain underlying causes of crime and should be used alongside socioeconomic, demographic, and environmental factors.

Applications

LQ is combined with other spatial analysis techniques to identify crime hotspots and patterns. It can produce maps showing crime distribution, aiding visualization and targeted intervention strategies.

Conclusion

The location quotient is a valuable tool for spatial crime analysis, allowing researchers to identify unusual crime concentrations. Despite its limitations, when used with other factors, it provides a more comprehensive understanding of crime patterns.

**Question 16：what is VIEWSHED ANALYSIS and what does The accuracy of viewshed analysis depend on?**

**What is Viewshed Analysis?**

Viewshed analysis is a technique used to determine the area that is visible from a given location, taking into account the terrain and other factors. It is commonly used in various fields such as archaeology, urban planning, and military operations.

**Factors Affecting the Accuracy of Viewshed Analysis**

The accuracy of viewshed analysis depends on several factors:

### 1. **Software Used**

The software used to perform the analysis can significantly impact the results. Different GIS software packages may use different algorithms and techniques to calculate viewsheds, which can affect the accuracy of the results [Data: Reports (5, 6)].

### 2. **Input Data Quality**

The quality of the input data is crucial for accurate viewshed analysis. The accuracy of the coordinates and the precision of the measurements are essential to ensure reliable results [Data: Reports (7, +more)].

### 3. **Scale of Analysis**

The scale at which the analysis is performed can also affect the accuracy of the results. Viewshed analysis may need to be performed at different scales depending on the specific application or use case [Data: Reports (7, 8)].

### 4. **Advanced Techniques**

Using advanced techniques such as ray tracing or radiosity can provide more accurate results but may require significant computational resources [Data: Reports (8)].

### 5. **Assumptions and Limitations**

Users should carefully consider the assumptions and limitations of the method when interpreting results, as viewshed analysis has limitations and potential biases [Data: Reports (8, +more)].

**Additional Considerations**

While viewshed analysis is a powerful tool for analyzing visibility, it assumes a flat Earth and does not account for non-orthogonal viewing angles or complex terrain features [Data: Reports (8, +more)]. Therefore, users should be aware of these limitations when interpreting results.

What is Viewshed Analysis?

Viewshed analysis determines the area visible from a given location, considering terrain and other factors. It is widely used in archaeology, urban planning, and military operations.

Factors Affecting Accuracy

Software Used: Different GIS packages use varying algorithms, affecting results [Data: Reports (5, 6)].

Input Data Quality: Accurate coordinates and precise measurements are essential for reliable outcomes [Data: Reports (7, +more)].

Scale of Analysis: Analysis scale influences results; different applications may require different scales [Data: Reports (7, 8)].

Advanced Techniques: Methods like ray tracing or radiosity increase accuracy but demand more computational resources [Data: Reports (8)].

Assumptions and Limitations: Users should consider inherent assumptions and potential biases [Data: Reports (8, +more)].

Additional Considerations

Viewshed analysis assumes a flat Earth and may not account for non-orthogonal viewing angles or complex terrain features. Awareness of these limitations is essential when interpreting results [Data: Reports (8, +more)].

**Question 17：How to work with file geodatabases in Arcmap?**

**Working with File Geodatabases in ArcMap**

=============================================

File geodatabases are a type of database that can be used to store and manage geographic data in ArcGIS. They provide a flexible and scalable way to store and query spatial data, making them an ideal choice for many applications.

### Creating a New File Geodatabase

---------------------------------

To create a new file geodatabase, follow these steps:

1. Open ArcMap and click on "File" > "New" > "Geodatabase"

2. Choose the location where you want to save your file geodatabase

3. Give your file geodatabase a name and choose the type of database you want to create (e.g., personal, enterprise)

### Adding Data to a File Geodatabase

--------------------------------------

Once you have created a new file geodatabase, you can add data to it by following these steps:

1. Click on "Add Data" in the toolbar and select "Feature Dataset"

2. Navigate to the location of your feature dataset and select the features you want to add

3. Right-click on the feature dataset in the Catalog window and select "Register"

### Registering a File Geodatabase

---------------------------------

To register a file geodatabase, follow these steps:

1. Open ArcMap and click on "File" > "Catalog"

2. Navigate to the location of your file geodatabase

3. Right-click on the database in the Catalog window and select "Register"

### Working with Feature Datasets

---------------------------------

Feature datasets are a key component of file geodatabases, allowing you to store and manage multiple feature classes together.

* To add a new feature dataset to a file geodatabase, click on "Add Data" in the toolbar and select "Feature Dataset"

* To edit a feature dataset, right-click on it in the Catalog window and select "Edit"

### Tips for Working with File Geodatabases

------------------------------------------

When working with file geodatabases, keep the following tips in mind:

* Make sure to register your file geodatabase regularly to ensure that it is properly connected to ArcMap

* Use feature datasets to store and manage multiple feature classes together

* Take advantage of the scalability and flexibility of file geodatabases to store and query large amounts of spatial data

Working with File Geodatabases in ArcMap

File geodatabases store and manage geographic data in ArcGIS, offering flexible and scalable solutions for querying and handling spatial data.

Creating a New File Geodatabase

1.Open ArcMap → "File" > "New" > "Geodatabase"

2.Choose a save location and provide a name

3.Select the type of geodatabase (personal, enterprise)

Adding Data

1.Click "Add Data" → select "Feature Dataset"

2.Navigate to your dataset and select features

3.Right-click the dataset in Catalog → "Register"

Registering a File Geodatabase

1.Open ArcMap → "File" > "Catalog"

2.Navigate to your geodatabase

3.Right-click → "Register"

Working with Feature Datasets

Feature datasets allow management of multiple feature classes together:

Add a dataset via "Add Data" → "Feature Dataset"

Edit by right-clicking in Catalog → "Edit"

Tips

Register your geodatabase regularly to maintain connection with ArcMap

Use feature datasets to organize multiple feature classes

Leverage geodatabases’ scalability and flexibility for large datasets

**Question 18：Introduce the GUI of QGIS to me.**

**QGIS User Interface Overview**

=====================================

The QGIS user interface is designed to provide an intuitive and efficient way to work with geospatial data. The main components of the interface are:

* **Map View**: This is where you interact with your geospatial data, displaying maps, analyzing data, and creating visualizations.

* **Layer List**: This allows users to manage their layers, add new layers, and remove existing ones.

**Key Features**

----------------

The Map View offers various tools for interacting with your data:

* **Zooming**: You can zoom in or out of the map using the mouse wheel or by clicking on the zoom buttons.

* **Panning**: Use the mouse to drag the map and pan across it.

* **Layer Styling**: Customize the appearance of layers by adjusting their properties.

Additionally, QGIS supports plugins that extend its functionality and provide access to specialized tools and algorithms. You can browse and install plugins from the QGIS Plugin Repository.

**Implications**

----------------

The QGIS user interface is designed to be flexible and adaptable to your needs. By utilizing its various tools and plugins, you can efficiently work with geospatial data and create meaningful visualizations.

QGIS User Interface Overview

The QGIS interface provides an intuitive environment for working with geospatial data. Key components include:

Map View: Displays and interacts with spatial data for analysis and visualization.

Layer List: Manages layers, allowing addition or removal.

Key Features

Zooming: Use the mouse wheel or zoom buttons.

Panning: Drag the map to navigate.

Layer Styling: Customize layer appearance via properties.

Plugins: Extend functionality with specialized tools via the QGIS Plugin Repository.

Implications

The QGIS interface is flexible and adaptable. By using its tools and plugins, users can efficiently manage geospatial data and produce meaningful visualizations.

**Question 19：How to geocode data by zip code in Arcmap?**

**Geocoding Data by Zip Code in ArcMap**

To geocode data by zip code in ArcMap, you will need to use the Geocoding tool or the Address Locator tool. The following steps provide a general overview of the process.

### Step 1: Prepare Your Data

Before geocoding your data, ensure that it is in a format compatible with ArcMap. You can use the Geocode Locations tool to geocode a list of locations using various methods, including address matching and reverse geocoding.

### Step 2: Choose Your Geocoding Method

You may choose between two primary methods for geocoding data by zip code:

* **Geocoding Tool**: This tool allows you to geocode a list of locations using various methods, including address matching and reverse geocoding.

* **Address Locator Tool**: This tool enables you to create a custom address locator that matches addresses with their corresponding locations. This can be useful for large datasets where accuracy is crucial.

### Step 3: Specify Input Data and Output Format

When using the Geocoding tool, specify the input data (addresses or zip codes) and the output format (e.g., points, polygons). You may also customize the geocoding process by specifying parameters such as the search radius and the maximum number of results.

### Step 4: Handle Errors and Exceptions

The Geocoding tool in ArcMap provides options for handling errors and exceptions during the geocoding process. You can specify how to handle unknown or ambiguous addresses, and customize the output format to suit your needs.

### Additional Considerations

* **Accuracy**: Geocoding data by zip code may not always result in accurate or precise locations, especially for rural areas or areas with complex street networks. You may need to use additional tools and techniques to improve the accuracy of your results.

* **Data Sources**: Consider using a local geodatabase or a geocoding service such as ArcGIS Online, which often have more up-to-date and accurate data than local geodatabases.

Geocoding Data by Zip Code in ArcMap

To geocode data by zip code in ArcMap, use the Geocoding Tool or Address Locator Tool.

Step 1: Prepare Your Data

Ensure data is compatible with ArcMap. The Geocode Locations tool can process lists of addresses using address matching or reverse geocoding.

Step 2: Choose Geocoding Method

Geocoding Tool: Geocode addresses using standard methods.

Address Locator Tool: Create custom locators for precise matching, suitable for large datasets.

Step 3: Specify Input and Output

Provide input data (addresses or zip codes) and select output format (points or polygons). Customize parameters like search radius and maximum results.

Step 4: Handle Errors

ArcMap allows managing unknown or ambiguous addresses and customizing output to handle exceptions.

Additional Considerations

Accuracy: Zip code geocoding may be less precise in rural or complex areas; additional tools may improve results.

Data Sources: Using local geodatabases or services like ArcGIS Online can provide more up-to-date and accurate data.

**Question 20：How to manage plugins in QGIS?**

**Managing Plugins in QGIS**

==========================

QGIS provides a range of built-in plugins for common tasks such as data visualization, geoprocessing, and spatial analysis. Users can also create their own custom plugins using Python or other programming languages.

### Installing Plugins ###

Plugins can be installed from the Plugin Manager, which is accessible through the Settings dialog. The Plugin Manager allows users to browse and install plugins from various repositories, including the QGIS Plugin Repository and user-created repositories.

**Caution:** When installing plugins from unknown sources, ensure that they are trusted repositories to avoid potential security risks [Data: Reports (2, 7, 34, 46, +more)].

### Updating Plugins ###

Regularly updating plugins is essential to ensure compatibility with the latest version of QGIS and to fix any security vulnerabilities. Users should regularly check for updates in the Plugin Manager and install them as needed.

**Recommendation:** Update plugins frequently to avoid potential issues [Data: Reports (1, 3)].

### Enabling and Disabling Plugins ###

Plugins can be enabled or disabled from the Plugins menu. This allows users to quickly switch between different plugins without having to uninstall and reinstall them.

### Configuring Plugin Settings ###

Some plugins may require configuration settings to function correctly. These settings can usually be accessed through the Settings dialog, where users can configure plugin options as needed.

**Note:** The availability of configuration settings will depend on the specific plugin being used [Data: Reports (3)].

### Removing Plugins ###

If a plugin is causing issues or conflicts, it can be removed from the Plugin Manager. However, this may require caution as removing a plugin can also remove its associated data and settings.

**Warning:** Be cautious when removing plugins to avoid losing important data and settings [Data: Reports (4)].

### Creating Custom Plugins ###

QGIS provides a range of tools and libraries for creating custom plugins using Python or other programming languages. Users can create their own custom plugins to extend the functionality of QGIS and perform specific tasks.

**Note:** Creating custom plugins requires programming knowledge and experience with QGIS [Data: Reports (+more)].

### Conclusion ###

Managing plugins in QGIS is a straightforward process that involves installing, updating, enabling, disabling, configuring, and removing plugins as needed. By following these steps, users can ensure that their plugins are up-to-date and functioning correctly, which will help to improve the overall performance and functionality of QGIS.

Managing Plugins in QGIS

QGIS provides built-in plugins for visualization, geoprocessing, and spatial analysis, and allows users to create custom plugins using Python or other languages.

Installing Plugins

Plugins are installed via the Plugin Manager, accessible through Settings. Users can browse repositories including the QGIS Plugin Repository and trusted user-created sources [Data: Reports (2, 7, 34, 46, +more)].

Updating Plugins

Regular updates ensure compatibility and fix vulnerabilities. Check the Plugin Manager periodically to install updates [Data: Reports (1, 3)].

Enabling and Disabling

Plugins can be toggled on or off from the Plugins menu without uninstalling.

Configuring Settings

Some plugins require configuration, accessible via the Settings dialog. Availability depends on the plugin [Data: Reports (3)].

Removing Plugins

Plugins causing conflicts can be removed via the Plugin Manager, but caution is advised to avoid losing associated data [Data: Reports (4)].

Creating Custom Plugins

Users can develop custom plugins with Python or other programming languages to extend QGIS functionality. Programming knowledge is required [Data: Reports (+more)].

Conclusion

Managing QGIS plugins involves installing, updating, enabling, disabling, configuring, and removing them. Proper management ensures plugins function correctly and improves overall QGIS performance.

**Question 21：How to create charts in Arcgis Pro?**

**Creating Charts in ArcGIS Pro**

ArcGIS Pro provides a range of chart types, including bar charts, pie charts, scatter plots, and more [Data: Reports (16, 18)]. Users can choose the type of chart that best suits their needs and then customize it to fit their project's requirements.

To create a chart, users can use various tools and techniques. For example, they can use the Watershed Tool to calculate watershed areas, which are then used to create a chart [Data: Reports (14)]. Additionally, users can save their chart as a separate file or embed it in a map by going to the 'File' menu and selecting 'Save As' [Data: Reports (18)].

**Customizing Charts**

ArcGIS Pro also allows users to customize the appearance of their charts by using various formatting options, such as changing the colors, fonts, and sizes of the elements [Data: Reports (16)]. This can help users create charts that are visually appealing and easy to understand.

**Programmatic Chart Creation**

Users who want to programmatically create charts in ArcGIS Pro can use the ArcGIS Pro SDK. This requires some programming knowledge and experience with the ArcGIS Pro API [Data: Reports (31, 30)].

**Key Concepts and Entities**

IGHORHOOD OPERATIONS is a key concept in the community, and its importance is reflected in its combined degree with other entities [Data: Reports (27)]. OFFSETA and OFFSETB are related parameters in ArcGIS, which can be used to create charts. However, the community has limited relationships between entities, with only two connections mentioned in the data.

Note that there may be additional record IDs that are relevant to this topic.

Creating Charts in ArcGIS Pro

ArcGIS Pro supports various chart types, including bar charts, pie charts, and scatter plots [Data: Reports (16, 18)]. Users can select the appropriate chart type and customize it to fit project needs.

Charts can be created using tools like the Watershed Tool, which calculates watershed areas for charting [Data: Reports (14)]. Charts can be saved as separate files or embedded in maps via the 'File' → 'Save As' option [Data: Reports (18)].

Customizing Charts

Users can adjust colors, fonts, and element sizes to create visually appealing and clear charts [Data: Reports (16)].

Programmatic Creation

Charts can also be generated programmatically using the ArcGIS Pro SDK, which requires familiarity with the ArcGIS Pro API [Data: Reports (31, 30)].

Key Concepts and Entities

IGHORHOOD OPERATIONS is a key concept, and OFFSETA and OFFSETB are related parameters for chart creation, though entity relationships in the data are limited [Data: Reports (27)].

**Question 22：How to creat a TIN surface in Arcgis Pro?**

**Geocoding Data by Zip Code in ArcMap**

To geocode data by zip code in ArcMap, you will need to use the Geocoding tool or the Address Locator tool. The following steps provide a general overview of the process.

### Step 1: Prepare Your Data

Before geocoding your data, ensure that it is in a format compatible with ArcMap. You can use the Geocode Locations tool to geocode a list of locations using various methods, including address matching and reverse geocoding.

### Step 2: Choose Your Geocoding Method

You may choose between two primary methods for geocoding data by zip code:

* **Geocoding Tool**: This tool allows you to geocode a list of locations using various methods, including address matching and reverse geocoding.

* **Address Locator Tool**: This tool enables you to create a custom address locator that matches addresses with their corresponding locations. This can be useful for large datasets where accuracy is crucial.

### Step 3: Specify Input Data and Output Format

When using the Geocoding tool, specify the input data (addresses or zip codes) and the output format (e.g., points, polygons). You may also customize the geocoding process by specifying parameters such as the search radius and the maximum number of results.

### Step 4: Handle Errors and Exceptions

The Geocoding tool in ArcMap provides options for handling errors and exceptions during the geocoding process. You can specify how to handle unknown or ambiguous addresses, and customize the output format to suit your needs.

### Additional Considerations

* **Accuracy**: Geocoding data by zip code may not always result in accurate or precise locations, especially for rural areas or areas with complex street networks. You may need to use additional tools and techniques to improve the accuracy of your results.

* **Data Sources**: Consider using a local geodatabase or a geocoding service such as ArcGIS Online, which often have more up-to-date and accurate data than local geodatabases.

Geocoding Data by Zip Code in ArcMap

To geocode by zip code in ArcMap, use the Geocoding Tool or Address Locator Tool.

Step 1: Prepare Data

Ensure data is compatible with ArcMap. The Geocode Locations tool can process lists using address matching or reverse geocoding.

Step 2: Choose Geocoding Method

Geocoding Tool: Standard method for address matching.

Address Locator Tool: Create custom locators for precise matching, suitable for large datasets.

Step 3: Specify Input and Output

Provide input data (addresses or zip codes) and select output format (points or polygons). Adjust parameters like search radius and maximum results.

Step 4: Handle Errors

Manage unknown or ambiguous addresses and customize output to handle exceptions.

Additional Considerations

Accuracy: Zip code geocoding may be imprecise in rural or complex areas; additional tools may improve results.

Data Sources: Local geodatabases or services like ArcGIS Online can provide more accurate and up-to-date data.
