# Supplementary material for: G-Pro bot: a GraphRAG-powered GIS (Geographical information system) chatbot
Source: PeerJ journal article supplement (doi:10.7717/peerj-cs.3520), 2026-01-26
Supplement: Table_S1.docx [file Table_S1.docx]

| ***Q. No.*** | ***A-Model*** | ***B-Model*** | ***C-Model*** |
| --- | --- | --- | --- |
| 1 | / | Hallucination; Omission; Reasoning Error | / |
| 2 | Omission | Omission; Reasoning Error | / |
| 3 | Omission | / | / |
| 4 | / | Omission | Irrelevant Detail |
| 5 | / | Omission | / |
| 6 | / | Hallucination; Omission; Reasoning Error; Irrelevant Detail | / |
| 7 | Omission | Omission | / |
| 8 | / | Hallucination; Omission; Irrelevant Detail | / |
| 9 | Omission | Hallucination; Omission; Irrelevant Detail | / |
| 10 | Omission | Omission; Irrelevant Detail | Irrelevant Detail |
| 11 | / | Omission | Hallucination; Omission; Irrelevant Detail |
| 12 | Omission; Irrelevant Detail | Omission | Omission; Irrelevant Detail |
| 13 | Omission | Omission | / |
| 14 | ATTENTION CHECK QUESTION. NOT APPLICABLE. | | |
| 15 | Omission | Omission | / |
| 16 | / | Omission | Omission |
| 17 | / | Omission | / |
| 18 | Omission | Omission | Omission |
| 19 | / | Hallucination; Omission; Irrelevant Detail | / |
| 20 | / | Omission; Irrelevant Detail | / |
| 21 | Hallucination; Irrelevant Detail | Omission | / |
| 22 | Irrelevant Detail | Omission; Irrelevant Detail | Hallucination; Omission; Irrelevant Detail |
| 23 | Hallucination; Omission; Irrelevant Detail | Hallucination; Omission; Reasoning Error | / |
