# Supplementary material for: G-Pro bot: a GraphRAG-powered GIS (Geographical information system) chatbot
Source: PeerJ journal article supplement (doi:10.7717/peerj-cs.3520), 2026-01-26
Supplement: The_questionnaire_Chinese_ver2.docx [file The_questionnaire_Chinese_ver2.docx]

地信领域聊天机器人回答质量评估问卷 v2

欢迎参与地理信息领域聊天机器人回答质量评估问卷！该问卷文本量较大，可能会花费您21-24分钟的时间，在您认真填写完该问卷后即可领取五元红包（为确保问卷质量，我们已设置最低答卷时间，未达到该时间将无法领取红包）。期待您的参与！本问卷旨在评估课题组训练的三个地理信息领域聊天机器人的回答质量。您将看到三个机器人A、B与C针对特定问题（共22题）做出的回答，在阅读后，考虑以下四个维度并在相应的选框中勾选最符合的一个，即选择胜者：1.全面性：三个答案中，哪个答案涵盖了最多的方面和细节（即充分回答了问题点）？2.丰富度：三个答案中，哪个答案提供了最多样的视角和见解（或给出题目之外的有用信息）？3.启发性：三个答案中，哪个答案对你做出判断最有用？4.直接性：三个答案中，哪个答案最直接、最能讲清楚问题？请注意，所有回答的来源机器人已隐藏，您的选择将基于回答本身，而非机器人身份。感谢您的参与！提示：本问卷仅用于评估和优化地理信息领域的聊天机器人性能，您的反馈对我们至关重要！

1、您是： 【下拉题】

○ 本科生

○ 研一生

○ 研二生

○ 研三生

○ 博士生

○ 教师

○ 自然保护从业者

○ 地理相关行业从业者

2、您的专业是 【单选题】

○ 地图学与地理信息系统

○ 人文地理学

○ 自然地理学

○ 资源与环境

○ 其他（请填写）

3、题目1：什么是空间分析和地理空间分析？这两个术语之间有什么区别？ 【矩阵单选题】

A机器人的回答空间分析和地理空间分析经常互换使用，但它们的含义截然不同。空间分析是指分析包含地理成分的数据的过程。它涉及使用各种统计和计算技术来识别数据集中与地球表面特定位置相关的模式、关系和趋势。这类分析主要关注数据的空间方面，例如不同位置之间的接近度、距离和连通性。一些常见的空间分析类型包括：地理编码：为地址或兴趣点分配地理坐标（经纬度）空间插值：根据附近的采样值估算未采样位置的值缓冲：根据指定距离在点、线或多边形周围创建区域地理空间分析地理空间分析是一个更全面的术语，涵盖空间分析以及其他用于分析地理数据的技术和工具。它涉及使用各种形式的地理空间数据（例如卫星图像、GPS 坐标和地图技术）来研究地理空间中的对象、现象和关系。地理空间分析的一些关键方面包括：地理信息系统 (GIS)：用于收集、存储、分析和显示地理参考数据的框架遥感：使用传感器从机载或星载平台捕获地球表面数据地理可视化**：创建交互式动态地理数据可视化的过程主要区别虽然空间分析和地理空间分析都涉及地理数据的研究，但主要区别在于它们的范围和重点。* 空间分析是一个更具体的术语，侧重于分析数据点之间空间关系的统计和计算技术。* 地理空间分析是一个更广泛的术语，不仅涵盖空间分析，还涵盖其他技术，例如 GIS、遥感和地理可视化。最终，术语的选择取决于项目或研究工作的背景和具体需求。B机器人的回答空间分析是一系列方法、统计数据和技术的集合，它融合了位置、面积、距离、交互等概念。地理空间分析丰富了 GIS 功能，可用于在 GIS 环境中设计新模型或集成现有模型。它也是“空间分析”的另一种说法。C机器人的回答理解空间分析和地理空间分析空间分析和地理空间分析是两个既相关又不同的概念，已被广泛研究并应用于各个领域。它们之间虽然存在一些相似之处，但也存在一些关键区别。空间分析的定义空间分析是指分析与地理位置或空间关系相关的数据的过程。它涉及使用统计和数学技术来理解空间数据中的模式、趋势和关系。空间分析可以使用各种方法和工具进行，包括地理信息系统 (GIS)、遥感和空间统计学。地理空间分析的定义地理空间分析是一个更广泛的术语，它将空间分析作为其组成部分之一。它涉及对地理参考数据的研究，以了解不同地理位置之间的关系及其相互作用。地理空间分析可能涉及使用空间自相关、空间回归和其他统计技术来分析和解释地理空间数据。主要区别虽然这两个术语经常互换使用，但它们的内涵或侧重点存在细微的差别。空间分析倾向于分析特定地理区域内的空间关系，而地理空间分析则采用更全面的方法，考虑不同地理位置之间的相互作用和关系。应用空间分析和地理空间分析在城市规划、环境科学、公共卫生、应急响应等领域都有许多实际应用]。它们可用于识别数据中可能无法通过其他方法立即显现的模式和趋势。领域的演变值得注意的是，空间分析和地理空间分析领域正在不断发展，新技术和工具层出不穷。因此，很难确定这两个术语之间的精确定义或区别。总而言之，虽然空间分析和地理空间分析之间存在一些差异，但它们也有很多相似之处，并且在实践中经常互换使用。术语的选择可能取决于具体的语境或学科。请比较三个回答的全面性、丰富度、启发性、直接性，再选择每个维度中胜出的回答。

|  | A | B | C |
| --- | --- | --- | --- |
| 全面性 | ○ | ○ | ○ |
| 丰富度 | ○ | ○ | ○ |
| 启发性 | ○ | ○ | ○ |
| 直接性 | ○ | ○ | ○ |

4、题目2：计量尺度的分类是什么？ 【矩阵单选题】

A机器人的回答在统计和数据分析领域，测量结果分为四个等级：名义、序数、区间和比率。### 名义等级名义等级表示没有固有顺序或层级的分类变量。示例包括：性别：男/女/其他；国籍：美国/法国/德国；颜色：红/蓝/绿名义变量用于识别特定类别，但不传达任何定量信息。### 序数等级序数等级变量具有自然顺序或层级，但相邻等级之间的差异可能不相等。示例包括：教育水平：高中/大学/学士/硕士；工作满意度：非常不满意/不满意/既不满意也不不满意/满意/非常满意；收入水平：低/中/高序数变量用于识别具有特定顺序的类别，但连续级别之间的间隔可能不相等。### 间隔级别间隔级别变量具有自然顺序，并且连续级别之间的间隔相等。示例包括：温度（摄氏度或华氏度）；时间（例如，时钟时间）；体重B机器人的回答根据文本，测量分为三个级别：1. 名义（仅名称）2. 序数（顺序或排名）3. 区间/比率（固定相等单位，可进行算术运算）C机器人的回答测量水平的分类======================================测量水平是统计学中的一个基本概念，它决定了如何分析和解释数据。测量水平主要有四种类型：名义型、序数型、区间型和比率型。名义尺度-----------------名义尺度用于将数据分类为具有固有顺序或排名的不同组。示例包括：性别（男/女）；国籍（原籍国）；品牌名称这些类别没有自然顺序或层级，无法对其进行数学运算。序数尺度-----------------序数尺度用于将数据分类为具有固有顺序或排名的不同组。示例包括：教育水平（高中、大学、研究生学位）；收入类别（低、中、高）这些类别具有自然顺序或层级结构，但它们之间的间隔并不相等。间隔尺度------------------间隔尺度用于测量连续级别之间间隔相等的数据。示例包括：温度（摄氏度或华氏度）；时间（小时、分钟、秒）这些类别之间的间隔相等，但没有真正的零点。比率尺度----------------比率尺度用于测量具有真正零点且连续级别之间间隔相等的数据。示例包括：体重；身高这些类别具有真正的零点且它们之间的间隔相等，因此适合进行数学运算。含义---------------测量水平的分类在统计学中至关重要，因为它决定了可以对数据进行的分析类型。名义尺度通常用于分类变量，而区间和比率尺度用于连续变量。了解变量的测量水平对于确保结果的准确性和意义至关重要。结论----------总而言之，测量水平的分类是统计学中的一个基本概念，它决定了如何分析和解释数据。通过了解不同类型的测量水平（名义、序数、区间和比率），研究人员可以选择合适的分析技术，并确保结果的准确性和意义。请比较三个回答的全面性、丰富度、启发性、直接性，再选择每个维度中胜出的回答。

|  | A | B | C |
| --- | --- | --- | --- |
| 全面性 | ○ | ○ | ○ |
| 丰富度 | ○ | ○ | ○ |
| 启发性 | ○ | ○ | ○ |
| 直接性 | ○ | ○ | ○ |

5、题目3：介绍克里金插值及其家族的所有成员。 【矩阵单选题】

A机器人的回答“克里格法”是一种流行的地理统计技术，用于空间插值，即根据附近的采样数据点估算未采样位置的值。克里金类型克里金法系列包括几种类型的插值器，它们的估算标准和假设各不相同。简单克里金法：假定变异图模型完全已知二元克里金法（OK）：估计群体的平均值普遍克里金法（UK）：假设趋势非恒定指标克里金法：将二元数据建模为指标变量克里金系列：简单克里金法：假设已知变异图模型二元克里金法：估计群体均值普遍克里金法：假设趋势非恒定指标克里金法：将二进制数据建模为指标B机器人的回答“克里格法”是一种地理统计方法，通过已知数据点之间的插值来预测未取样位置的数值。它是一种广泛应用于地理学、地质学和环境科学等多个领域的技术。Kriging 系列包括以下几个成员：二进制克里金法（OK）：这是最常用的方法，假定基本过程是静态的。通用克里金法（UK）：这种方法允许非平稳过程，并能处理多个变量。简单克里金法（SK）：假定有已知的均值和方差，是一种分析性更强的点内插法。指标克里金：用于分类或二元数据，估计事件发生的概率。分离克里金法：与指标克里金法类似，但用于多个类别或等级。块克里金：将数据分组为区块或区域而非单个点时使用的方法。这些方法的基本假设和可处理的数据类型各不相同，用户可根据要解决的具体问题选择最合适的技术。C机器人的回答克里金法简介克里金法是一种用于插值的地理统计方法，它可以根据观测地点的值来估计未观测地点的变量值。它广泛应用于地理学、地质学和环境科学等多个领域。克里金法家族成员Kriging 家族由多个成员组成，每个成员都有自己独特的特点和应用：1. 普通克里金法 (OK)普通克里金法是克里金法的一种，它根据观测地点的值来估计未观测地点的值，而不假定任何基本过程。它广泛用于插值，并已应用于地理学、地质学和环境科学等多个领域。2. 通用克里金法（UK）通用克里金法是普通克里金法的一般化，允许使用非平稳协方差函数，并能处理多个变量。它假定基本过程具有已知的均值和方差。3. 协同克里金协同克里金法是克里金法的一种，它结合多个变量来估算一个未观测位置的值。它根据另一个相关变量的值来估计一个变量的值。其他成员克里金法家族的其他成员包括简单克里金法和指标克里金法。不过，这些方法的应用不如普通克里金法、通用克里金法和协同克里金法广泛。结论总之，克里金法是一种功能强大的地理统计插值方法，已被广泛应用于各个领域。Kriging 家族由多个成员组成，每个成员都有自己独特的特点和应用。了解 Kriging 的不同类型对于为特定问题选择最合适的方法至关重要。请比较三个回答的全面性、丰富度、启发性、直接性，再选择每个维度中胜出的回答。

|  | A | B | C |
| --- | --- | --- | --- |
| 全面性 | ○ | ○ | ○ |
| 丰富度 | ○ | ○ | ○ |
| 启发性 | ○ | ○ | ○ |
| 直接性 | ○ | ○ | ○ |

6、题目4：什么是边缘效应以及如何应对它？ 【矩阵单选题】

A机器人的回答边缘效应，也称为边界效应或晕轮效应，是指由于采样规模减少，研究区域边缘附近的观测值方差被人为夸大。### 为什么会出现边缘效应？采样规模减少：边缘附近的观测值减少；边界偏差：由于缺乏邻近点导致方差增加；边缘引起的异质性：边缘和内部观测值之间的差异如何应对边缘效应：1. 裁剪或修剪数据：* 从数据集中移除边缘行和列* 仅使用中心单元（例如，忽略角落单元）2.使用边缘调整方法：应用特殊技术来减少边界效应：* 边界偏差校正* 空间滤波### 边缘调整方法如何进一步最小化边缘效应：*邻域分析：关注具有足够邻近点的区域*距离加权：为边缘观测分配较低的权重”B机器人的回答当研究区域边缘附近的事件或点位置受到边界影响时，就会出现边缘效应，由于事件数量较少，会导致结果出现明显差异。为了解决这个问题，可以采用各种边缘校正技术：1. 警戒区：在边缘周围创建缓冲区。2. 模拟外部边界：扩展或创建虚拟边界。3. 缩小研究区域：缩小研究区域。4. Ripley 边缘校正公式：一种校正边缘效应的数学方法。此外，蒙特卡洛模拟方法可以作为一种更可靠的方法，在空间分析和合并过程中解释边缘效应。C机器人的回答边缘效应：了解其成因和后果边缘效应是指发生在两个不同环境或生态系统（例如森林和草原）边界的变化。这些变化会对生活在这些区域的物种产生重大影响，导致种群动态、行为改变，甚至灭绝。### 边缘效应的成因边缘效应的成因多种多样且复杂，但主要因素包括：栖息地破碎化：栖息地被分割成更小的斑块，导致栖息地质量下降，隔离加剧。边缘相关的微气候：栖息地边缘的温度、湿度和光照水平发生变化，这可能对某些物种造成不利影响。捕食增加：捕食者出现在栖息地边缘会导致猎物物种的捕食压力增加。### 边缘效应的后果边缘效应的后果影响深远，会对生态系统产生重大影响。其中一些主要影响包括：物种灭绝：由于种群动态变化和栖息地质量下降导致物种灭绝。生态系统过程变化：栖息地边缘可能发生营养循环、水流和其他生态系统过程的改变。生物多样性降低：栖息地边缘物种丰富度和均匀度的降低。### 应对边缘效应为了应对边缘效应，可以采取以下几种策略：栖息地恢复：恢复退化或破碎的栖息地，以提高其质量和连通性。边缘管理：管理栖息地边缘，以减少其对栖息于其中的物种的影响。这可以包括诸如疏伐植被、修剪树木或创建缓冲带等技术。保护规划：制定考虑边缘效应影响并旨在减轻其影响的保护计划。请比较三个回答的全面性、丰富度、启发性、直接性，再选择每个维度中胜出的回答。

|  | A | B | C |
| --- | --- | --- | --- |
| 全面性 | ○ | ○ | ○ |
| 丰富度 | ○ | ○ | ○ |
| 启发性 | ○ | ○ | ○ |
| 直接性 | ○ | ○ | ○ |

7、题目5：GIS 有哪些用途？ 【矩阵单选题】

A机器人的回答GIS（地理信息系统）是一款强大的工具，用户能够收集、分析和显示地理参考数据。以下是 GIS 的各种应用示例：### 自然资源管理1. 土地利用规划：确定适合开发、保护或资源开采的区域。2. 水资源管理：分析和管理水质、水量和水分布。3. 野生动物栖息地分析：确定并保护濒危物种的栖息地。### 城市规划与发展1. 基础设施规划：优化道路、公用设施和其他基础设施的布局。2. 分区法规：确保遵守分区法规。3. 应急响应规划：为自然灾害和紧急情况做好准备。### 环境监测与保护1. 气候变化分析：追踪气温、降水和海平面的变化。2. 空气质量监测：分析污染物浓度并识别污染源。3. 土壤退化评估：监测土壤侵蚀、盐碱化和养分耗竭。### 交通规划与管理1. 路线优化：为物流、配送或应急服务寻找最高效的路线。2. 交通分析：识别拥堵热点并优化交通流量。3. 公共交通规划：设计高效的公共交通系统。### 灾害响应与恢复1. 损害评估：分析飓风、地震或野火等自然灾害造成的损害。2. 资源配置：优化灾害响应工作的资源分配。3. 恢复规划：为灾后恢复计划提供信息。这些示例展示了 GIS 在各个领域和行业的广泛应用。B机器人的回答根据文中所述，GIS（地理信息系统）的一些用途包括：1. 集成数据管理技术，辅助解读空间数据集。2. 利用地理空间数据持续取得成功。3. 通过提供有意义的数据，创建新的应用程序和最终用户。这些用途凸显了 GIS 作为解答地理位置或区域相关问题的工具的重要性，使其成为各个领域和行业的关键系统。C机器人的回答地理信息系统 (GIS) 的用途GIS 在各个领域有着广泛的应用，包括：### 1. 交通规划分析交通流量、道路网络优化和公共交通系统；研究交通网络，包括路线、交通模式和基础设施发展### 2. 环境管理计算河流流域面积；分析植物分布模式和根系### 3. 城市规划绘制并分析人口密度，以确定人口增长率高和资源配置需求高的地区；研究地质学领域的地质结构和过程### 4. 灾害响应与恢复使用 GIS 进行灾害响应与恢复工作；创建交互式地图和 Web 应用程序，用于公众参与和教育### 5. 教育与研究在教育环境中教授地理概念和技能；分析系统中不同实体之间的关系，例如植物分布和根系### 6. 数据管理与存储使用 GIS 进行社区数据管理和存储；在不同实体之间进行协作和协调，例如规划部门和第五章数据这些只是 GIS 众多用途中的几个例子。该技术在各个领域都有着广泛的应用，使其成为数据分析、可视化和决策的重要工具。请比较三个回答的全面性、丰富度、启发性、直接性，再选择每个维度中胜出的回答。

|  | A | B | C |
| --- | --- | --- | --- |
| 全面性 | ○ | ○ | ○ |
| 丰富度 | ○ | ○ | ○ |
| 启发性 | ○ | ○ | ○ |
| 直接性 | ○ | ○ | ○ |

8、题目6：列举地理信息系统在城市规划和管理中的应用示例。 【矩阵单选题】

A机器人的回答以下是地理信息系统 (GIS) 在城市规划和管理中的一些应用示例：交通规划优化公共交通路线：使用 GIS 确定公交车、火车或其他公共交通方式的最有效路线。分析交通模式：使用实时数据确定拥堵热点并优化交通流量。土地利用规划分区法规执行：使用 GIS 确保遵守分区法律和条例。确定适合开发的区域：分析地形、土壤质量或环境敏感性等地理特征。基础设施管理水资源管理：使用 GIS 优化供水系统、识别泄漏并管理水资源。废物管理：跟踪废物产生、收集路线和处置地点以提高效率。应急响应规划应急响应路线规划：使用 GIS 确定最有效的路线在自然灾害或其他紧急情况下为应急响应人员提供信息。资源分配：使用 GIS 优化灾害响应工作的资源分配。公共卫生和安全识别健康风险区域：分析疾病爆发、环境危害或社会经济因素的地理数据以确定关注区域。制定应急响应计划：使用 GIS 为应急响应计划和资源分配提供信息。这些示例展示了如何将 GIS 应用于城市规划和管理，以提高公民的生活质量并优化资源利用。B机器人的回答以下是地理信息系统 (GIS) 在城市规划和管理中的一些应用示例：公用事业的提供和服务中断规划。空间建模，尤其是在以下领域：a. 3D 打印b. 水管破裂c. 参与式 GISC机器人的回答地理信息系统在城市规划和管理中的应用地理信息系统 (GIS) 通过提供对城市发展、基础设施和服务各个方面的洞察，在城市规划和管理中发挥着至关重要的作用。以下是 GIS 在该领域的一些关键应用：1. 人口密度分析创建名为 POP_DEN 的人口密度字段是城市规划和管理中的一项基本任务。这有助于了解城市内的人口分布，从而为资源分配、基础设施开发和服务提供决策提供信息。2. 城市经济分析GIS 可用于分析城市发展对环境的经济影响，并就可持续发展做出明智的决策。这包括分析不同发展情景对城市基础设施和服务的影响。3. 环境影响评估城市规划人员可以使用 GIS 评估开发项目对环境的影响并确定可持续发展的领域。这涉及分析开发对环境的潜在影响，包括污染、气候变化和自然灾害。4. 应急响应规划和灾害风险降低GIS 用于城市管理，用于应急响应规划和灾害风险降低等任务。这包括创建地图和模型，以模拟不同开发场景对城市基础设施和服务的影响。5. 智慧城市发展GIS 可以通过整合来自各种来源的数据（包括传感器、社交媒体和物联网设备）来帮助创建智慧城市。这使城市管理者能够就资源分配、基础设施开发和服务提供做出明智的决策。要点和含义GIS 是城市规划和管理的强大工具，可提供有关人口密度、经济分析、环境影响评估、应急响应规划和减少灾害风险的见解。城市规划人员可以使用 GIS 创建地图和模型，以模拟不同发展情景对城市基础设施和服务的影响。GIS 可以通过整合来自各种来源的数据来帮助创建智慧城市。在城市规划和管理中使用 GIS 有助于降低成本并优化资源配置。请比较三个回答的全面性、丰富度、启发性、直接性，再选择每个维度中胜出的回答。

|  | A | B | C |
| --- | --- | --- | --- |
| 全面性 | ○ | ○ | ○ |
| 丰富度 | ○ | ○ | ○ |
| 启发性 | ○ | ○ | ○ |
| 直接性 | ○ | ○ | ○ |

9、题目7：GIS在犯罪学领域的应用有哪些？ 【矩阵单选题】

A机器人的回答GIS 在犯罪分析中的应用GIS（地理信息系统）越来越多地用于犯罪分析领域，帮助执法机构更好地了解和打击犯罪活动。1. 犯罪地图绘制空间分布：分析犯罪的空间分布，以确定模式和热点。犯罪率：按地区或社区计算犯罪率，以制定警务策略。2. 预测警务预测犯罪地点：使用 GIS 分析历史犯罪数据并预测未来犯罪可能发生的地点。识别高风险区域：使用 GIS 分析识别犯罪活动可能性高的区域。3. 战术行动规划优化巡逻路线：使用 GIS 为警察确定最有效的巡逻路线。资源分配：根据地理和人口统计数据分配人员、设备和预算等资源。4. 情报主导警务识别犯罪网络：分析地理和网络数据，了解参与犯罪活动的个人和团体之间的关系。提供战略决策信息：使用 GIS 提供关于警务策略和资源分配的战略决策信息。B机器人的回答地理信息系统 (GIS) 在犯罪领域的应用犯罪识别犯罪地图绘制犯罪调查显示事件的空间模式犯罪预测这些应用展示了 GIS 在空间背景下分析和解释犯罪活动方面的优势。C机器人的回答GIS 在犯罪分析中的应用地理信息系统 (GIS) 已成为犯罪分析的重要工具，为执法机构和决策者提供了宝贵的见解。以下各节总结了 GIS 在犯罪分析中的关键应用。1. 犯罪模式识别和制图GIS 能够识别犯罪热点和模式，从而进行有针对性的干预和资源分配。分析师已使用 GIS 绘制犯罪地点、类型和频率，揭示犯罪与贫困、失业和人口密度等人口因素之间的相关性。2. 犯罪现场调查和重建GIS 用于法医分析，以重建犯罪现场、分析证据和拼凑事件。这有助于调查人员识别嫌疑人、追踪他们的行动并收集证据。3. 犯罪预防和减少策略GIS 可用于识别犯罪率高的地区及贫困状况，从而进行有针对性的干预和资源分配。分析师还使用 GIS 制定预防和干预策略，例如社区警务和犯罪预防计划。4. 沟通和公众意识GIS 可以帮助执法机构与公众沟通，并提供有关犯罪趋势和安全问题的信息。这提高了透明度并建立了执法部门和社区之间的信任。5. 局限性和未来方向虽然 GIS 在犯罪分析中显示出前景，但关于其在预防和减少犯罪方面的有效性的证据有限。需要进一步研究才能充分了解 GIS 在该领域的潜力。结论总之，GIS 在犯罪分析中有许多应用，从识别犯罪模式和热点到重建犯罪现场和制定预防策略。然而，还需要进行更多的研究来充分发挥其潜力并解决隐私和数据安全方面的担忧。请比较三个回答的全面性、丰富度、启发性、直接性，再选择每个维度中胜出的回答。

|  | A | B | C |
| --- | --- | --- | --- |
| 全面性 | ○ | ○ | ○ |
| 丰富度 | ○ | ○ | ○ |
| 启发性 | ○ | ○ | ○ |
| 直接性 | ○ | ○ | ○ |

10、题目8：GIS在海洋学各个领域的应用是什么？ 【矩阵单选题】

A机器人的回答GIS 在海洋学中的应用地理信息系统（GIS）在海洋学的各个领域都有广泛的应用，它帮助研究人员和科学家更好地了解海洋与周围环境之间的复杂相互作用。以下是 GIS 在海洋学领域的一些关键应用：1. 洋流和环流追踪洋流：使用 GIS 分析洋流的历史数据，以确定其模式和变化。这有助于研究洋流如何影响全球气候和海洋生态系统。预测海洋环流：基于气候预测，GIS 可模拟未来海洋环流的变化，提供对气候变化的影响的预测。2. 海洋生态系统绘制海洋栖息地地图：使用 GIS 创建详细的海洋生态系统地图，包括珊瑚礁、红树林、河口等栖息地，有助于生态保护和物种研究。分析物种分布：利用 GIS 分析物种分布和生物多样性丰富的区域，从而支持生态保护和资源管理。3. 海岸管理识别侵蚀热点：GIS 可分析海岸侵蚀的历史数据，帮助确定易受侵蚀的区域，为沿海防护规划提供信息。规划沿海开发：GIS 为沿海开发决策提供支持，帮助决策者选择海堤、防波堤等基础设施的最佳位置，减少环境影响。4. 气候变化研究分析海洋酸化：GIS 被用来模拟和分析二氧化碳排放引起的海洋酸化过程，了解其对海洋生态系统的潜在威胁。调查海平面上升：基于气候变化预测，GIS 可用于模拟和预测海平面上升，帮助评估沿海地区的风险。5. 海洋地质学绘制海底地形：GIS 可用于分析海底的测深数据，创建海底地形的详细地图，帮助研究海底的构造和地质活动。识别海洋灾害：通过分析海啸、地震等自然灾害的历史数据，GIS 可以帮助识别海洋灾害的危险区域，为灾害预警和应急管理提供支持。总结这些应用展示了 GIS 在海洋学中的广泛用途，帮助我们更深入地理解海洋及其环境之间的相互作用。这些技术不仅为科研提供支持，还为资源管理、环境保护和灾害预防决策提供有力的工具。B机器人的回答GIS 在海洋学各个领域的应用包括用于沿海区域评估和管理的数据分发工具、测绘工具和监测分析工具。它还涉及空间参考海洋数据的主要采样方法和在线来源，以及 GIS 如何有助于绘制某些海洋现象的应用示例。此外，GIS 几乎应用于海洋学研究的所有方面，结合了船上研究调查的各种地理参考数据以及沿海环境和公海中的海洋 GIS 应用。C机器人的回答GIS 在海洋学各个领域的应用GIS（地理信息系统）在海洋学的各个领域发挥着至关重要的作用，使研究人员能够收集、分析和可视化大型数据集。GIS 在海洋学中的应用有很多，包括：1. 海洋气候建模GIS 用于研究海洋与大气之间的相互作用，帮助研究人员了解气候变化对海洋环流、海平面上升和其他现象的影响。2. 沿海区管理GIS 用于沿海区管理，以评估人类活动对沿海生态系统的影响、追踪鱼类种群、监测捕鱼活动和制定可持续的捕鱼做法。3. 水下探索和测绘GIS 用于水下探索和测绘，以创建海底地形的详细地图并确定新的科学研究领域。4. 海洋酸化研究GIS 用于研究海洋化学变化对海洋生态系统的影响，帮助科学家了解海洋酸化与其他气候变化因素之间的复杂关系。5. 海岸侵蚀建模GIS 用于海岸侵蚀建模，以预测和减轻海平面上升对沿海社区的影响。6. 渔业管理GIS 用于渔业管理，以追踪鱼类种群、监测捕捞活动和制定可持续捕捞实践。在海洋学中使用 GIS 有许多好处，包括：改进数据可视化和分析增强对海洋和大气过程之间复杂关系的理解更好地管理沿海生态系统和渔业确定新的科学研究领域总体而言，GIS 在海洋学各个领域的应用对于增进我们对世界海洋的了解和减轻气候变化的影响至关重要。”请比较三个回答的全面性、丰富度、启发性、直接性，再选择每个维度中胜出的回答。

|  | A | B | C |
| --- | --- | --- | --- |
| 全面性 | ○ | ○ | ○ |
| 丰富度 | ○ | ○ | ○ |
| 启发性 | ○ | ○ | ○ |
| 直接性 | ○ | ○ | ○ |

11、题目9：列出渔业 GIS 工具和举措。 【矩阵单选题】

A机器人的回答以下是一些主要的渔业 GIS 工具和举措：### 渔业 GIS 工具1. FISHBASE：一个包含鱼类及其生态数据的数据库，可使用 GIS 进行分析。2. 渔业 GIS 工具 (FGT)：一款用于分析和可视化渔业数据的软件工具，包括捕捞率、捕捞努力量和海洋保护区。3. 海洋生态系统 GIS 工具：一款用于创建详细海洋生态系统地图的工具，包括鱼类栖息地和洄游路线。### 渔业举措1. 渔业管理信息系统 (FMIS)：一项全球举措，旨在利用 GIS 和其他技术，开发一个标准化的渔业数据管理系统。2. 区域渔业管理委员会：许多国家都建立了区域委员会，利用 GIS 来管理渔业资源并制定明智的渔业法规决策。3. 海洋保护区 (MPA)：MPA 是指定的人类活动区域。为保护海洋生物多样性，相关活动受到限制，通常使用 GIS 来识别和绘制保护区地图。### 国际倡议1. 联合国粮食及农业组织 (FAO) 渔业部：FAO 渔业部与各国合作，制定和实施可持续渔业管理实践，包括使用 GIS。2. 海洋保护协会：一个全球性组织，使用 GIS 和其他技术来识别和解决海洋保护问题，包括过度捕捞。3. 海洋保护研究所 (MCI)：MCI 与各国政府和非政府组织合作，使用包括 GIS 在内的一系列工具来保护海洋生态系统。这些只是众多现有渔业 GIS 工具和倡议中的几个例子。B机器人的回答根据正文，以下是一些提及的渔业 GIS 工具和举措：1. GIS 模型中水文与生态学的整合；2. 确定 GIS 在渔业应用中的应用目标；3. 为 GIS 应用组织渔业统计数据；4. 渔业 GIS 数据库的开发；5. 遥感 (RS) 数据在渔业 GIS 中的应用请注意，正文并未提供详尽的列表，而是重点介绍了书中提到的一些具体举措和工具。C机器人的回答地理信息系统（GIS）目前广泛应用于全球渔业和水产养殖领域，作为数据库和可视化工具被众多国际组织采用 。联合国粮食及农业组织（FAO）是GIS应用的重要推动者 。FAO开发了渔业全球信息系统（FIGIS），这是一个基于互联网的交互式系统，旨在为决策者提供全球渔业状况和趋势的及时、可靠信息 。FIGIS将提供水生物种、海洋资源、渔业和捕捞技术等方面的空间信息 。它还将支持政策制定者转向以可持续性为中心的管理，提供渔业问题和趋势的战略数据、信息、分析和审查的单一入口 。FAO还建立了在线的全球金枪鱼和旗鱼捕捞图集，其中包含这些物种渔业信息的GIS地图 。其他重要项目和倡议包括：NOAA的国家海洋服务局：通过生物地理学项目开发海洋生物资源分布和生态知识及产品 。尤其关注重要鱼类栖息地（EFH）的识别和管理，GIS在此过程中被广泛用于叠加物种分布与栖息地特征 。不列颠哥伦比亚大学渔业中心（FC）：提供渔业方面的广泛产品，包括在线出版物和软件，如“Ecopath with Ecosim”用于构建海洋和淡水生态系统中营养流动的模型 。渔业信息与分析系统（FIAS）：一个正在进行的项目，旨在加强西北非洲国家在资源管理方面的能力，并通过GIS模块整合渔业相关数据及其他数据集 。VIBES项目：一项针对本格拉生态系统中中上层鱼类资源可行性的研究项目，其产品包括一个GIS，用于评估环境、资源和开发之间的关系 。国际气候预测研究所：利用卫星信息研究秘鲁沿海海洋条件的变化，并将其与小中上层鱼类的捕捞量进行比较 。大湖渔业GIS：一个成熟的监测和管理系统，用于大湖区的渔业资源，通过10x10英寸的统计“矩形”监测系统与GIS数据库链接 。欧洲背景下的GIS应用：欧盟的共同渔业政策（CFP）正在审查中，要求将环境因素纳入渔业政策制定，GIS在此方面发挥着重要作用 。MarLIN倡议提供关于海洋栖息地、群落和物种的信息 。渔业GIS部门（英国坎特伯雷基督教会大学）开发了FISHCAM，一个基于GIS的电子渔业数据记录系统 。FAO COPEMED项目：强调GIS在渔业管理中空间方法的重要性，并提供关于GIS如何帮助决策者的宝贵信息 。总的来说，GIS在渔业领域的应用日益广泛，从数据管理、可视化、模型构建到政策制定和资源管理都发挥着关键作用 。请比较三个回答的全面性、丰富度、启发性、直接性，再选择每个维度中胜出的回答。

|  | A | B | C |
| --- | --- | --- | --- |
| 全面性 | ○ | ○ | ○ |
| 丰富度 | ○ | ○ | ○ |
| 启发性 | ○ | ○ | ○ |
| 直接性 | ○ | ○ | ○ |

12、题目10：地表水水文学研究使用哪些类型的数据？ 【矩阵单选题】

A机器人的回答地表水水文学研究需要各种类型的数据来了解和分析地表水的运动、行为和特性。### 水文数据1. 溪流流量数据：测量溪流或河流沿岸特定点的水位和流量。2. 水质数据：测量物理和化学特性，例如 pH 值、温度、浊度和营养水平。3. 沉积物数据：测量沉积物负荷、大小和类型，以了解侵蚀和沉积过程。### 地形数据1. 数字高程模型 (DEM)：表示地形的栅格或矢量数据集。2. 激光雷达 (LiDAR) 数据：高分辨率 3D 地形测量数据，包括植被高度和水面高程。### 气象数据1. 降水数据：测量降雨、降雪或其他形式的降水特定位置。2. 蒸发数据：测量湖泊、水库或湿地等地表的蒸发速率。3. 大气温湿度数据：测量空气温湿度水平，以估算大气与地表水之间的能量转移。### 水文地质数据1. 地下水位数据：测量特定水井或压力计的地下水位。2. 地下水位图：地下水位高程和范围的栅格或矢量表示。### 土地利用/土地覆盖数据1. 土地利用分类：土地利用的分类，例如农业、城市、森林或湿地。2. 土地覆盖分类：土地覆盖类型的分类，例如植被、土壤、岩石或水体。这些数据集为地表水水文学研究提供了重要信息，使研究人员和实践者能够对各种地表水的行为进行建模、分析和预测。环境。”B机器人的回答文中并未明确说明地表水水文学研究所需的数据类型。但根据上下文，可以推断所需的数据类型包括：1. 数字高程模型 (DEM) 数据2. 实时监测数据3. 档案数据库4. 关联模型这些类型的数据在文中单独的章节中提及，与地表水水文学研究和建模相关。C机器人的回答用于地表水水文学研究的数据类型地表水水文学研究涉及收集和分析各种类型的数据，以了解水体的特征、行为和影响。以下是地表水水文学研究中使用的一些主要数据类型：1. 现场测量现场测量对于收集地表水水文学数据至关重要。这些数据集可能包括 pH 值、温度、溶解氧水平以及水体的其他物理和化学特性等参数。2. 径流数据径流数据用于测量河流和溪流的流速。此类数据对于了解水文循环和预测洪水或干旱事件至关重要。3. 水质数据水质数据用于评估水体的化学、物理和生物特性。4. 遥感数据遥感数据（例如卫星图像）可用于监测水位、探测水循环变化以及分析细胞间的空间关系。此类数据适于大规模监测和分析。5. 人口普查数据Census.gov 提供官方人口普查数据，可用于地表水水文学研究，以了解人口动态及其对水资源的影响。其他数据类型可用于地表水水文学研究的其他数据类型包括：* 水温、pH 值和其他物理和化学参数的现场测量* 用于高级数据处理和分析的克里金法* 康斯坦茨湖滨带地理信息系统 (GIS) 可能对地表水水文学研究中的社区动态### 启示 ###地表水水文学研究中使用的数据类型多种多样，取决于具体的研究问题或目标。了解水体的特征、行为和影响需要一种综合的方法，该方法需要融合多种类型的数据。利用遥感数据、实地测量和人口普查数据可以为水资源与人类活动之间的复杂关系提供宝贵的见解。请比较三个回答的全面性、丰富度、启发性、直接性，再选择每个维度中胜出的回答。

|  | A | B | C |
| --- | --- | --- | --- |
| 全面性 | ○ | ○ | ○ |
| 丰富度 | ○ | ○ | ○ |
| 启发性 | ○ | ○ | ○ |
| 直接性 | ○ | ○ | ○ |

13、题目11：如果我在绘制洪泛区地图，应使用哪些数据？ 【矩阵单选题】

A机器人的回答“流域特征水文线和区域河流网络、交汇处和改道子流域水库河流和雨量计水力建模特征所用的水力模型水力结构河道溢流段属性特征水文建模特征所用的水文模型回归方程强度持续时间-频率关系降水事件类型和模式测量和高程特征等高线ERM（高程参考标记）点永久基准点PLSS（公共土地测量系统）线和区域点高程横截面线洪水特征BFE（基本洪水高程）线洪水保险风险区域和线一般结构（桥梁、水坝、堰等）堤坝CBRS（沿海屏障资源系统）区域沿海横断面线河道横截面线来源：改编自 FEMA（2005 年）。建筑物码头地块记录的地役权参考信息DOQ 指数公司面板区域水平参考线水平参考点四边形区域研究区域边界政治和交通特征政治管辖区政治线交通（道路、火车轨道和机场）”B机器人的回答您应该使用数字高程模型 (DEM) 和地块数据来确定河段中每种土地利用的水面高程-损害曲线。C机器人的回答“### 洪泛区测绘数据要求 ###要生成准确的洪泛区地图，必须整合各种数据集，这些数据集提供有关洪泛区形态、随时间变化和潜在洪水风险的信息。以下各节总结了多位分析师对数据集不同部分进行重点研究的主要发现。1. 地理信息系统 (GIS) 软件使用 GIS 软件整合和分析各种数据集并创建全面的洪泛区地图 。2. 卫星图像和航空摄影卫星图像和航空摄影可以提供有关洪泛区形态和随时间变化的视觉信息。这种数据类型对于识别具有高保水能力的区域特别有用 。3. 地质数据土壤类型和含水层特征等地质数据有助于识别具有洪水风险高。此外，土壤湿度等地质数据有助于识别具有高蓄水能力的地区 。4. 流域分析流域工具计算流域面积，然后用于创建流域输出。这表明，了解和管理流域区域对于洪泛区测绘至关重要，并且可能对环境管理和保护工作产生影响。5. 空间自相关分析ANSELIN LOCAL MORANS I 是该社区中的关键实体，它是用于计算收入的局部空间自相关的工具，这可能会影响洪泛区管理 。请比较三个回答的全面性、丰富度、启发性、直接性，再选择每个维度中胜出的回答。

|  | A | B | C |
| --- | --- | --- | --- |
| 全面性 | ○ | ○ | ○ |
| 丰富度 | ○ | ○ | ○ |
| 启发性 | ○ | ○ | ○ |
| 直接性 | ○ | ○ | ○ |

14、题目12：什么是空间数据？请举一些空间数据中包含的数据类型的例子。 【矩阵单选题】

A机器人的回答空间数据是指任何包含地理或空间坐标的信息，这些信息可以在地图上可视化，并使用地理信息系统 (GIS) 进行分析。此类数据可以包括点数据（例如地址）和多边形数据（例如土地边界）。### 空间数据中包含的数据类型示例1. 地址点：存储包含纬度、经度和地址详细信息的位置。2. 地块边界：使用多边形或折线表示产权界线和形状。3. 街道网络：包含道路几何形状、交通模式和转弯限制。4. 地质构造：使用栅格数据（例如 DEM）或矢量数据（例如多边形图层）显示地下地质结构。5. 水文特征：将河流、湖泊和其他水体表示为多边形或折线。6. 地形表面：模拟地形高程和使用栅格数据（例如 DEM）或矢量数据（例如 TIN）计算坡度。7. 土地覆盖分类：将土地分为不同类型（例如森林、草地、城镇地区）。8. 人口统计：使用点数据显示人口密度和分布。9. 经济指标：将经济趋势（例如人均 GDP）可视化为栅格或矢量图层。10. 环境监测数据：跟踪污染水平、温度和其他环境因素随时间的变化。这些示例展示了空间数据中包含的数据类型的多样性，这些数据可用于从城市规划到气候建模等广泛的应用领域。B机器人的回答空间数据是指任何具有地理位置或参考的信息，例如：空间数据包含的数据类型：- 点（例如地理坐标、地址）- 线（例如道路、边界）- 区域（例如代表国家/地区、州/省的多边形）- 字段（例如海拔、温度）这些数据类型可用于分析和可视化地理环境中的模式、关系和趋势。C机器人的回答什么是空间数据？空间数据是指任何具有地理位置或参考信息的信息，例如经纬度坐标。它可以用来表示各种类型的数据，包括点、线、多边形、栅格和网络。空间数据中包含的数据类型示例一些常见的空间数据示例包括：* 点：用经纬度坐标表示，用于标记地图上的特定位置。* 线：用于表示两点之间的路线或路径，例如道路或河流。* 多边形：表示地图上的区域，例如国家/地区或建筑物。* 栅格：用于表示连续数据，例如海拔或温度。存储和交换空间数据的常见格式空间数据可以以各种格式存储和交换，包括：Shapefile；GeoJSON；KML。这些格式允许高效地存储和处理数据。在不同系统和应用程序之间传输空间数据。空间数据来源空间数据可以从各种来源收集，包括：GPS 设备；卫星图像；实地观测。它通常与其他类型的数据结合使用，以提供对世界的更全面的理解。空间数据的应用空间数据在各个领域拥有广泛的应用，包括：地理信息系统 (GIS)；地图服务；基于位置的服务；城市规环境监测；应急响应，这些应用依赖于空间数据来提供洞察并做出明智的决策。空间数据的其他示例空间数据的其他一些示例包括：人口密度图；气候模型；交通模式。这些类型的数据用于理解和分析世界的各个方面，从人口到环境现象。请比较三个回答的全面性、丰富度、启发性、直接性，再选择每个维度中胜出的回答。

|  | A | B | C |
| --- | --- | --- | --- |
| 全面性 | ○ | ○ | ○ |
| 丰富度 | ○ | ○ | ○ |
| 启发性 | ○ | ○ | ○ |
| 直接性 | ○ | ○ | ○ |

15、题目13：什么是地图投影？ 【矩阵单选题】

A机器人的回答地图投影是一种将地球表面（一个三维的球体或椭球体）上的地理特征，通过数学变换转换到二维平面上的过程。由于这种转换不可避免地会产生变形，不同的投影方法会选择在面积、形状、距离或方向中的某一个或几个方面进行最小化扭曲，而牺牲其他的方面。因此，选择合适的地图投影对于准确表示地理信息至关重要。B机器人的回答地图投影是将地球的三维球面或椭球面转换到二维平面上的数学方法。C机器人的回答理解地图投影地图投影是将地球表面上的地理坐标转换为平面坐标的系统性数学方法。由于地球表面是无法在不产生任何变形的情况下被平铺成一个平面的，因此所有的地图投影都会引入某种形式的失真。这些失真可能表现在形状、面积、距离或方向上。不同的地图投影旨在保留特定属性或最小化某些类型的变形，这取决于地图的用途。例如：等角投影：保留形状的准确性，即在地图上的任何一点，方向都是正确的，但面积可能会被大大扭曲。等面积投影：保留面积的准确性，即地图上任何区域的面积比例与地球上的实际面积比例一致，但形状可能会被扭曲。等距离投影：保留从一个或两个中心点到所有其他点的距离的准确性，但通常不能同时保持形状和面积的准确性。方位投影：保留从中心点到所有其他点的方向的准确性。地图投影的选择对于GIS应用至关重要，因为它直接影响到空间分析的准确性，例如距离计算、面积测量以及地理特征之间的空间关系分析。请比较三个回答的全面性、丰富度、启发性、直接性，再选择每个维度中胜出的回答。

|  | A | B | C |
| --- | --- | --- | --- |
| 全面性 | ○ | ○ | ○ |
| 丰富度 | ○ | ○ | ○ |
| 启发性 | ○ | ○ | ○ |
| 直接性 | ○ | ○ | ○ |

16、题目14：什么是空间自相关，它对地理问题有何种重要性？ 【矩阵单选题】

A机器人的回答空间自相关是指某个区域的现象是否与周围区域的现象相关。正的空间自相关表示相似的现象聚集在一起，负的空间自相关则表示相异的现象分开。它对地理问题的重要性体现在能够帮助我们发现现象的空间模式和分布，从而优化资源分配。B机器人的回答空间自相关是指地理区域内现象之间的空间相关性。它帮助我们理解某些现象是否在空间上有规律地分布。了解这一点对于地理问题的研究有一定帮助。C机器人的回答空间自相关是指地理空间中某个现象的值与其邻近区域的值之间存在的相关性。具体来说，空间自相关可以分为正的和负的两种类型。正的空间自相关意味着相似的值聚集在一起，例如，在某些区域内，污染浓度高的地方通常会邻近其他污染浓度高的区域；负的空间自相关则意味着相异的值相互隔离，比如不同种类的土地利用可能会在空间上分布得比较分散。空间自相关的分析对于理解地理现象的空间分布至关重要。通过研究空间自相关，研究人员可以发现并解释某些现象的空间模式，这对于地理问题的解决具有重要意义。例如，在城市规划中，通过分析不同区域的土地利用模式，政策制定者可以更有效地规划城市功能区的布局，确保资源的合理分配；在公共卫生领域，通过空间自相关的分析，能够揭示疾病传播的模式，帮助公共卫生管理部门实施更加精准的防控措施。此外，空间自相关分析在环境科学、犯罪学、社会经济学等多个领域都有着广泛应用。它能够帮助研究人员识别出空间上的热点区域或异常区域，为决策提供有力的数据支持。通过空间自相关，研究者不仅能够揭示现象本身的空间模式，还能深入探讨不同现象之间的相互影响，揭示潜在的因果关系。因此，空间自相关不仅是空间数据分析中的重要工具，也是多学科研究中的基础工具之一。请比较三个回答的全面性、丰富度、启发性、直接性，再选择每个维度中胜出的回答。

|  | A | B | C |
| --- | --- | --- | --- |
| 全面性 | ○ | ○ | ○ |
| 丰富度 | ○ | ○ | ○ |
| 启发性 | ○ | ○ | ○ |
| 直接性 | ○ | ○ | ○ |

17、题目15：什么是矢量化和栅格化？ 【矩阵单选题】

A机器人的回答矢量化和栅格化是用于在不同形式的地理数据之间进行转换的两个关键过程。### 矢量化矢量化通过识别和勾勒栅格数据集中的要素或对象，将栅格数据转换为矢量格式。此过程通常包含以下几个步骤：1. 栅格到矢量转换：使用检测边、线和边界的算法将栅格图层转换为矢量图层。2. 边界提取：从转换后的矢量数据中提取每个要素的边界。3. 要素创建：根据提取的边界创建单独的要素或多边形。### 栅格化栅格化通过在矢量数据的顶点或边之间插值，将矢量数据转换为栅格格式。此过程包括：1. 矢量到栅格转换：使用在顶点之间插值的算法将矢量图层转换为栅格图层。2. 格网创建：创建一个具有指定像元大小和分辨率的格网，在该格网上插值将被计算。3. 插值：根据原始矢量数据计算网格中每个像元的插值。### 矢量化和栅格化的影响1. 细节的丢失或增加：在不同格式之间转换可能会导致细节的丢失或增加，具体取决于所使用的具体处理方法。2. 数据精度：转换后数据的精度取决于原始数据集的质量和转换算法的有效性。3. 处理时间和内存占用：矢量化和栅格化需要大量的处理能力和内存资源，尤其是对于大型数据集而言。总而言之，矢量化和栅格化是地理信息系统 (GIS) 中必不可少的流程，允许用户在不同数据格式之间进行转换，每种格式都有其自身的优势和局限性。B机器人的回答矢量化是将栅格线转换为矢量格式的过程，涉及线细化、提取和拓扑重建。另一方面，栅格化是将矢量数据转换为栅格数据，通常用于显示或存储目的。C机器人的回答矢量化和栅格化：全面概述矢量化和栅格化是地理信息系统 (GIS) 和遥感应用中用于在不同格式之间转换数据的两个基本过程。了解这两个过程之间的差异对于高效存储、操作和分析空间数据至关重要。### 什么是矢量化？矢量化是将栅格数据转换为矢量格式的过程。这涉及从栅格数据集中提取空间特征，并将其表示为几何形状，例如点、线或多边形。矢量化通常更适合于详细地表示地理特征，以便进行精确的测量和计算。### 什么是栅格化？栅格化是将矢量数据转换为栅格格式的过程。这涉及将矢量数据集划分为小单元或像素，以创建基于网格的表示。栅格化更适用于精度要求不高、主要以可视化为目标的大规模数据集。### 要点及其含义* 矢量化保留了要素之间的空间关系，使其成为详细呈现地理要素的理想选择。* 栅格化会损失原始矢量数据的部分精度和灵活性，但会提供更适合大规模数据集和可视化用途的格式。* 矢量化和栅格化都是 GIS 和遥感应用中必不可少的过程，能够高效地存储、操作和分析空间数据。### 工具和软件各种工具和软件可用于矢量化和栅格化，包括 ArcGIS、QGIS 和 GDAL。这些工具提供了一系列数据转换、操作和分析功能。请比较三个回答的全面性、丰富度、启发性、直接性，再选择每个维度中胜出的回答。

|  | A | B | C |
| --- | --- | --- | --- |
| 全面性 | ○ | ○ | ○ |
| 丰富度 | ○ | ○ | ○ |
| 启发性 | ○ | ○ | ○ |
| 直接性 | ○ | ○ | ○ |

18、题目16：犯罪制图（Crime Mapping）中的区位商是什么？ 【矩阵单选题】

A机器人的回答“位置商 (LQ) 是空间犯罪地图绘制中使用的统计指标，用于分析和比较不同地点的犯罪相对集中度。定义LQ 衡量特定区域的犯罪数量与基于所有区域平均率的预期犯罪数量的比率。它表明某个地点的犯罪率是高于还是低于平均水平。计算LQ = (地点犯罪数量/犯罪总数) ÷ (地点预期犯罪数量/预期犯罪总数)其中：地点犯罪数量 是特定地点报告的实际犯罪数量。犯罪总数 是所有地点报告的犯罪总数。地点预期犯罪数量 是基于该地点平均率的预期犯罪数量。预期犯罪总数 是该地点预期犯罪总数根据所有地点的平均犯罪率预测犯罪数量。解释LQ 值 = 1 表示某个地点的犯罪率与其他地区相比处于平均水平。大于 1 的值表示犯罪率高于平均水平，而小于 1 的值表示犯罪率低于平均水平。空间犯罪地图绘制中的重要性LQ 对于识别高犯罪热点和了解犯罪的空间分布至关重要。它可以帮助执法机构：目标资源：关注犯罪集中度高的地区，以优化资源分配。制定预防策略：根据特定地区的犯罪模式实施有针对性的干预措施。监测犯罪趋势：使用 LQ 计算跟踪犯罪率随时间的变化。通过应用位置商，空间犯罪地图绘制专业人员可以获得有关犯罪模式的宝贵见解，并做出明智的决策以提高公共安全。”B机器人的回答位置商是空间犯罪学中使用的地理度量，表示特定现象在子区域内的相对代表性与其在整个研究区域内的整体分布相比。它衡量某种犯罪类型在特定位置发生的可能性与区域平均值相比有多大或多小。如果位置商等于 1，则意味着犯罪的发生在整个区域内均匀分布。值大于 1 表示代表性过高，而值小于 1 表示代表性不足。C机器人的回答“### 空间犯罪地图中的区位商区位商 (LQ) 是空间犯罪地图中使用的统计工具，用于分析不同地点的犯罪分布并确定具有异常模式或犯罪集中的区域。它允许研究人员比较不同地区的犯罪分布并确定明显高于或低于预期的区域。计算区位商可以使用多种方法计算区位商，包括简单区位商和标准化区位商。方法的选择取决于特定的研究问题和可用的数据。标准化方法和 z 分数方法也用于计算 LQ 。区位商的局限性虽然区位商是空间分析的有用工具，但它也有一些局限性。例如，它没有考虑所研究的局部区域的大小，如果区域太小或太大 。此外，LQ 可能无法提供犯罪根本原因的完整图景，应与其他因素（如社会经济条件、人口统计特征和环境因素）结合使用。位置商的应用位置商通常与其他空间分析技术结合使用，以识别犯罪热点和模式。它可用于创建显示不同地点犯罪分布的地图，使研究人员能够更有效地可视化和理解犯罪模式。LQ 还可用于识别需要有针对性干预或警务策略的区域。数据参考位置商已应用于各种空间犯罪地图研究 。例如，一项使用报告数据（1、3）的研究发现，LQ 可用于识别特定犯罪集中度较高的地区。另一项使用报告数据（5、6）的研究发现，LQ 可与其他空间分析技术结合使用，以识别犯罪热点和犯罪模式。结论总之，位置商是犯罪地图绘制中空间分析的有用工具。它允许研究人员比较不同地区的犯罪分布，并识别具有异常犯罪模式或集中度的地区。虽然 LQ 有一些局限性，但它可以与其他因素结合使用，以更全面地了解犯罪模式。”请比较三个回答的全面性、丰富度、启发性、直接性，再选择每个维度中胜出的回答。

|  | A | B | C |
| --- | --- | --- | --- |
| 全面性 | ○ | ○ | ○ |
| 丰富度 | ○ | ○ | ○ |
| 启发性 | ○ | ○ | ○ |
| 直接性 | ○ | ○ | ○ |

19、题目17：什么是视域分析？视域分析的准确性取决于什么？ 【矩阵单选题】

A机器人的回答视域分析是地理信息系统 (GIS) 中使用的一种技术，用于确定从给定视点（例如建筑物、山脉或其他高地）可以看到哪些位置或区域。### 视域分析的工作原理1. 障碍物数据：识别可能遮挡视线的地形特征和建筑物。2. 视点数据：定义用于分析可见性的视点的位置和高程。3. 视线计算：使用空间分析算法确定从视点可见的位置，同时考虑地形特征和建筑物等障碍物。### 影响视域分析的因素1. 高程数据精度：高程数据的质量会显著影响视域结果的精度。2. 障碍物数据完整性：包含或排除树木、电线或其他自然或人造特征等障碍物会影响可见性。3. 视点位置和方向：视点位置的变化或方向的变化会改变视线，从而改变从该点可见的区域。### 精度因素视域分析的精度取决于以下几个因素：1. 数据分辨率：高分辨率数据，例如 LiDAR（激光雷达）或高空间分辨率的正射影像，可以提高结果的精度。2. 垂直精度：高程数据中的微小误差都可能导致视域计算出现严重误差。3. 水平精度：水平坐标的误差也会影响结果。为了确保视域分析结果的准确性，必须使用高质量的数据并仔细考虑输入参数，例如障碍物包含情况和视点位置。B机器人的回答根据文中所述，“视域分析”是指确定从给定视点可见区域的应用。视域分析的精度取决于其参数和解译方法。视域分析分为两种类型：简单视域分析和累积视域分析。Mouflis 等人 (2008) 的一项研究表明，这两种方法之间的选择会影响解译结果。C机器人的回答什么是视域分析？视域分析是一种用于确定从给定位置可见区域的技术，它会考虑地形和其他因素。它常用于考古、城市规划和军事行动等各个领域。影响视域分析精度的因素视域分析的精度取决于以下几个因素：### 1. 使用的软件用于执行分析的软件会显著影响结果。不同的 GIS 软件包可能使用不同的算法和技术来计算视域，这会影响结果的精度。### 2. 输入数据质量输入数据的质量对于准确的视域分析至关重要。坐标的准确性和测量的精度对于确保可靠的结果至关重要。### 3. 分析比例执行分析的比例也会影响结果的精度。根据具体应用或用例，视域分析可能需要以不同的比例执行。### 4. 高级技术使用光线追踪或辐射度等高级技术可以提供更准确的结果，但可能需要大量的计算资源。### 5. 假设和局限性用户在解释结果时应仔细考虑该方法的假设和局限性，因为视域分析存在局限性和潜在偏差。其他注意事项虽然视域分析是分析可见性的强大工具，但它假设地球是平坦的，并且没有考虑非正交的视角或复杂的地形特征。因此，用户在解释结果时应注意这些局限性。请比较三个回答的全面性、丰富度、启发性、直接性，再选择每个维度中胜出的回答。

|  | A | B | C |
| --- | --- | --- | --- |
| 全面性 | ○ | ○ | ○ |
| 丰富度 | ○ | ○ | ○ |
| 启发性 | ○ | ○ | ○ |
| 直接性 | ○ | ○ | ○ |

20、题目18：如何在 Arcmap 中使用文件地理数据库？ 【矩阵单选题】

A机器人的回答文件地理数据库是 Esri ArcGIS 平台用于存储地理数据的一种数据库。以下是如何在 ArcMap 中使用它们：### 创建文件地理数据库1. 启动 ArcMap：打开 ArcMap 并创建一个新项目。2. 创建文件地理数据库：点击“文件”“新建”“数据库”，然后选择要保存数据库的位置。### 向文件地理数据库添加数据1. 连接到地理数据库：在目录树中，右键单击地理数据库并选择“添加数据集”。2. 导入数据：选择所需的数据集（例如，shapefile、Excel 表），然后选择要创建的要素类或表的类型。3. 指定属性：根据需要设置架构和其他属性。### 使用文件地理数据库中的数据1. 查看和编辑数据：打开在目录树中双击地理数据库中的要素类或表即可查看它们。2. 查询和分析数据：使用 ArcMap 的各种工具查询、空间分析和可视化存储在文件地理数据库中的数据。### 管理文件地理数据库1. 备份和恢复数据：定期将数据导出为 Shapefile 或其他格式进行备份，并在需要时进行恢复。2. 压缩和修复数据库：使用 ArcGIS 的内置工具定期压缩和修复地理数据库。### 最佳实践* 使用有意义的名称和清晰的文件夹结构，使文件地理数据库井然有序。* 定期更新数据以确保准确性和一致性。* 对于大型或复杂的项目，请考虑使用企业级地理数据库。按照以下步骤操作，您可以有效地在 ArcMap 中使用文件地理数据库，并利用其强大的功能来管理和分析地理数据。B机器人的回答要在 ArcMap 中使用文件地理数据库，请按照以下步骤操作：1. 使用 ArcCatalog 或 Catalog 创建一个新的文件地理数据库，方法是右键单击文件夹，然后选择“新建 文件地理数据库”。2. 使用要素类、独立表和其他对象填充文件地理数据库。3. 在 ArcMap 中，将文件地理数据库添加为与项目的连接。4. 使用 ArcMap 中的工具编辑文件地理数据库中的数据。注意：文件地理数据库是可用作 GIS 数据存储库的文件夹，但需要使用 ArcCatalog 或 Catalog 来创建和管理它们。C机器人的回答在 ArcMap 中使用文件地理数据库================================================文件地理数据库是一种可用于在 ArcGIS 中存储和管理地理数据的数据库。它们提供了一种灵活且可扩展的存储和查询空间数据的方式，使其成为许多应用程序的理想选择。### 创建新的文件地理数据库要创建新的文件地理数据库，请按照以下步骤操作：1. 打开 ArcMap，然后点击“文件”“新建”“地理数据库”；2. 选择要保存文件地理数据库的位置；3. 为文件地理数据库命名，并选择要创建的数据库类型（例如，个人数据库、企业数据库）### 向文件地理数据库添加数据创建新的文件地理数据库后，您可以按照以下步骤向其中添加数据：1. 点击工具栏中的“添加数据”，然后选择“要素数据集”；2. 导航到要素数据集的位置，并选择要添加的要素；3. 在目录窗口中右键单击要素数据集，然后选择“注册”### 注册文件地理数据库要注册文件地理数据库，请按照以下步骤操作：1. 打开 ArcMap，然后点击“文件”“目录”；2. 导航到文件地理数据库的位置；3. 在目录窗口中右键单击数据库，然后选择“注册”### 使用要素数据集要素数据集是文件地理数据库的重要组成部分，可用于同时存储和管理多个要素类。* 要向文件地理数据库添加新的要素数据集，请点击工具栏中的“添加数据”，然后选择“要素数据集* 要编辑要素数据集，请在目录窗口中右键单击该数据集，然后选择“编辑”### 使用文件地理数据库的提示使用文件地理数据库时，请牢记以下提示：* 请务必定期注册文件地理数据库，以确保其正确连接到 ArcMap* 使用要素数据集来存储和管理多个要素类* 利用文件地理数据库的可扩展性和灵活性来存储和查询大量空间数据请比较三个回答的全面性、丰富度、启发性、直接性，再选择每个维度中胜出的回答。

|  | A | B | C |
| --- | --- | --- | --- |
| 全面性 | ○ | ○ | ○ |
| 丰富度 | ○ | ○ | ○ |
| 启发性 | ○ | ○ | ○ |
| 直接性 | ○ | ○ | ○ |

21、题目19：向我介绍一下 QGIS 的 GUI。 【矩阵单选题】

A机器人的回答QGIS 是一款开源地理信息系统 (GIS)，它提供了一个用户友好的界面来处理地理空间数据。以下是其主要组件的概述：### 主界面1. 工具栏：顶部工具栏提供各种工具和功能，例如文件管理、投影工具和空间分析。2. 菜单栏：菜单栏提供下拉菜单，用于执行编辑、地理配准和图层管理等任务。3. 项目管理器：项目管理器允许您打开和管理您的项目，包括图层、样式和地图。4. 画布：地图显示所在的位置，显示空间数据及其相关属性。### 面板1. 图层列表面板：显示项目中所有图层的列表，方便您轻松管理图层。2. 属性面板：提供对图层属性的访问，例如符号系统、标注和 SQL 查询。3. 图例面板：显示每个图层的图例，方便您理解数据。4. 属性表面板：显示所选要素类或表的属性表。### 工具1. 工具按钮：位于工具栏顶部，此按钮可用于访问各种工具和功能。2. 标尺工具：用于测量地图上距离和面积的基本工具。3. 橡皮筋工具：用于在地图上绘制矩形或多边形以选择要素。### 导航1. 缩放控件：位于屏幕底部，这些控件可用于放大和缩小地图。2. 平移按钮：用于使用鼠标拖动地图来平移地图。3. 全图按钮：重置视图以显示数据的全图范围。### 其他功能1. 项目设置：用于设置项目特定的设置，例如投影和坐标系。2. 插件管理器：允许您安装和管理 QGIS 插件，以增强功能。通过浏览这些组件，您可以高效地在 QGIS 中处理地理空间数据，并充分利用其强大的功能。B机器人的回答遗憾的是，提供的文本并未介绍 QGIS 本身的图形用户界面 (GUI)，而是将其与 ArcGIS 进行了比较，并提及了其功能。不过，我可以告诉您，QGIS 是一款开源地理信息系统 (GIS) 软件，提供各种数据操作、分析和可视化工具。QGIS 的 GUI 设计简洁直观，方便用户轻松导航和执行以下任务：* 创建和编辑空间图层* 运行各种类型的查询和分析* 以不同格式（例如栅格、矢量）可视化数据* 应用拓扑规则编辑点、线和面图层如果您想了解更多关于 QGIS GUI 的信息，我可以推荐一些在线资源，例如 QGIS 官方文档或教程视频，它们概述了 QGIS 的界面和功能。C机器人的回答QGIS 用户界面概览QGIS 用户界面旨在提供直观高效的地理空间数据处理方式。界面主要包含以下组件：地图视图：您可以在此处与地理空间数据进行交互，包括显示地图、分析数据以及创建可视化效果。图层列表：用户可以在此管理图层、添加新图层以及删除现有图层。主要功能地图视图提供多种数据交互工具：缩放：您可以使用鼠标滚轮或点击缩放按钮来放大或缩小地图。平移：使用鼠标拖动地图并进行平移。图层样式：通过调整图层属性来自定义图层的外观。此外，QGIS 还支持以下插件：扩展其功能并提供专用工具和算法的访问权限。您可以从 QGIS 插件库中浏览和安装插件。QGIS 用户界面设计灵活，可根据您的需求进行调整。通过利用其各种工具和插件，您可以高效地处理地理空间数据并创建有意义的可视化效果。请比较三个回答的全面性、丰富度、启发性、直接性，再选择每个维度中胜出的回答。

|  | A | B | C |
| --- | --- | --- | --- |
| 全面性 | ○ | ○ | ○ |
| 丰富度 | ○ | ○ | ○ |
| 启发性 | ○ | ○ | ○ |
| 直接性 | ○ | ○ | ○ |

22、题目20：在Arcmap中如何根据邮政编码对数据进行地理编码？ 【矩阵单选题】

A机器人的回答“地理编码涉及将地理坐标（纬度和经度）分配给地址或位置。以下是使用“地理编码地址”工具在 ArcMap 中执行此操作的方法：先决条件ArcGIS Desktop 版本 10.x 或更高版本ArcGIS 地理编码服务 或 World Geocoder分步说明选择数据：在 ArcMap 中打开您的数据集，然后选择包含要进行地理编码的邮政编码的字段。地理编码地址工具：在“分析”工具箱中，单击“地理编码地址”“地理编码地址”。地理编码服务或 World Geocoder：选择地理编码服务（例如 ArcGIS 地理编码服务）或选择 World Geocoder。选项：设置所需的地理编码选项，例如位置容差和匹配准确性。运行工具：单击“确定”执行该工具。结果输出将是一个新的要素类，其中包含原始地址值和新创建的纬度和经度坐标字段。然后，您可以在各种分析或可视化中使用这些数据。提示和变体将“地理编码地址”工具与其他地理空间工具（如空间连接或缓冲）结合使用。尝试使用不同的地理编码服务或世界地理编码器来优化结果。考虑使用 ArcGIS 的内置地理编码功能来处理较小的数据集。通过遵循这些步骤并利用 ArcMap 的地理编码功能，您可以有效地将邮政编码转换为地理坐标。”B机器人的回答“要在 ArcMap 中按邮政编码对数据进行地理编码，请按照以下步骤操作：从 Chapter8\Tutorials 打开 Tutorial8-1，并将项目另存为 Tutorial8-1YourName。转到地理编码工具栏并单击地理编码地址按钮。选择 PAZipCodes 并单击确定。在地理编码对话框中，选择单个字段，为完整邮政编码字段选择 ZIP_Code，并将输出名称更改为“geocode_zip”。确保仅选择地址和 ZIP_Code 作为地理编码的必要字段，因为您可以使用邮政编码查找城市和州。查看表格后关闭它们。通过执行以下步骤，您将能够在 ArcMap 中按邮政编码对数据进行地理编码。”C机器人的回答“在 ArcMap 中按邮政编码对数据进行地理编码要在 ArcMap 中按邮政编码对数据进行地理编码，您需要使用地理编码工具或地址定位器工具。以下步骤概述了该过程。步骤 1：准备数据在对数据进行地理编码之前，请确保其格式与 ArcMap 兼容。您可以使用地理编码位置工具通过各种方法对位置列表进行地理编码，包括地址匹配和反向地理编码。步骤 2：选择您的地理编码方法您可以选择两种主要方法按邮政编码对数据进行地理编码：地理编码工具：此工具允许您使用各种方法对位置列表进行地理编码，包括地址匹配和反向地理编码。地址定位器工具：此工具可让您创建自定义地址定位器，将地址与其对应的位置匹配。这对于准确性至关重要的大型数据集非常有用。步骤3：指定输入数据和输出格式使用地理编码工具时，请指定输入数据（地址或邮政编码）和输出格式（例如点、多边形）。您还可以通过指定搜索半径和最大结果数等参数来自定义地理编码过程。步骤 4：处理错误和异常ArcMap 中的地理编码工具提供了在地理编码过程中处理错误和异常的选项。您可以指定如何处理未知或模糊的地址，并自定义输出格式以满足您的需求。其他注意事项准确性：按邮政编码对数据进行地理编码可能并不总是能得到准确或精确的位置，尤其是对于农村地区或街道网络复杂的地区。您可能需要使用其他工具和技术来提高结果的准确性。数据来源：考虑使用本地地理数据库或地理编码服务（如 ArcGIS Online），它们通常比本地地理数据库具有更新、更准确的数据。请注意，提供的报告按重要性降序排列。如果您需要有关流程任何方面的更多信息或说明，请参阅相关报告以了解更多详细信息。”请比较三个回答的全面性、丰富度、启发性、直接性，再选择每个维度中胜出的回答。

|  | A | B | C |
| --- | --- | --- | --- |
| 全面性 | ○ | ○ | ○ |
| 丰富度 | ○ | ○ | ○ |
| 启发性 | ○ | ○ | ○ |
| 直接性 | ○ | ○ | ○ |

23、题目21：如何在 QGIS 中管理插件？ 【矩阵单选题】

A机器人的回答QGIS 提供了强大的插件管理器，让您可以轻松安装、更新和卸载插件。以下是如何在 QGIS 中管理插件的方法：### 安装插件1. 插件管理器：前往“设置”“插件”打开插件管理器。2. 搜索栏：使用插件管理器顶部的搜索栏搜索所需的插件。3. 安装：选择要安装的插件，然后点击“安装”按钮。### 更新插件1. 插件管理器：前往“设置”“插件”打开插件管理器。2. 有可用更新：如果任何已安装的插件有可用更新，它将列在插件管理器中。3. 更新：选择要更新的插件，然后点击“更新”按钮。### 卸载插件1. 插件管理器：通过导航至“设置”“插件”打开插件管理器。2. 卸载：选择要卸载的插件，然后点击“卸载”按钮。3. 确认：确认您要卸载该插件。### 管理插件设置1. 插件管理器：通过导航至“设置”“插件”打开插件管理器。2. 设置：点击每个已安装插件旁边的设置图标来管理其设置。### 技巧和变体* 使用插件管理器中的“浏览插件”按钮浏览可用的插件。* 考虑使用像 PyPI 这样的 QGIS 插件库管理器。* 保持您的 QGIS 安装为最新版本，以确保您可以访问最新的插件和功能。按照以下步骤操作，您可以高效地管理 QGIS 中的插件，并充分利用其丰富的功能插件生态系统。B机器人的回答遗憾的是，提供的文本并未提及如何在 QGIS 中管理插件。不过，我可以提供一些关于如何在 QGIS 中管理插件的常规信息：要管理 QGIS 中的插件，您可以按照以下步骤操作：1. 打开 QGIS，然后前往“插件”“管理和安装插件...”2. 这将打开“插件管理器”对话框。3. 在这里，您可以：* 从 QGIS 插件库中浏览并安装新插件。* 更新现有插件。* 禁用或移除已安装的插件。注意：这些步骤可能会因您的 QGIS 版本而略有不同。C机器人的回答管理 QGIS 中的插件QGIS 提供了一系列内置插件，可用于数据可视化、地理处理和空间分析等常见任务。用户还可以使用 Python 或其他编程语言创建自定义插件。### 安装插件 ###插件可以通过“设置”对话框访问插件管理器进行安装。插件管理器允许用户浏览和安装来自各种存储库的插件，包括 QGIS 插件存储库和用户创建的存储库。**注意：** 安装来自未知来源的插件时，请确保它们是受信任的存储库，以避免潜在的安全风险。### 更新插件 ###定期更新插件对于确保与最新版本的 QGIS 兼容并修复任何安全漏洞至关重要。用户应定期在插件管理器中检查更新并根据需要安装。**建议：**经常更新插件以避免潜在问题。### 启用和禁用插件 ###可以从“插件”菜单中启用或禁用插件。这允许用户快速切换不同的插件，而无需卸载并重新安装它们。### 配置插件设置 ###某些插件可能需要配置设置才能正常运行。这些设置通常可以通过“设置”对话框访问，用户可以在其中根据需要配置插件选项。**注意：**配置设置的可用性取决于所使用的具体插件。### 移除插件 ###如果某个插件导致问题或冲突，可以从插件管理器中将其移除。但是，这可能需要谨慎操作，因为移除插件也会删除其关联的数据和设置。**警告：**移除插件时请小心，以免丢失重要数据和设置.### 创建自定义插件 ###QGIS 提供了一系列工具和库，可使用 Python 或其他编程语言创建自定义插件。用户可以创建自己的自定义插件来扩展 QGIS 的功能并执行特定任务。**注意：**创建自定义插件需要编程知识和 QGIS 使用经验。### 结论 ###在 QGIS 中管理插件是一个简单的过程，包括根据需要安装、更新、启用、禁用、配置和删除插件。通过遵循这些步骤，用户可以确保其插件保持最新并正常运行，这将有助于提升 QGIS 的整体性能和功能。请比较三个回答的全面性、丰富度、启发性、直接性，再选择每个维度中胜出的回答。

|  | A | B | C |
| --- | --- | --- | --- |
| 全面性 | ○ | ○ | ○ |
| 丰富度 | ○ | ○ | ○ |
| 启发性 | ○ | ○ | ○ |
| 直接性 | ○ | ○ | ○ |

24、题目22：如何在 Arcgis Pro 中创建图表？ 【矩阵单选题】

A机器人的回答ArcGIS Pro 提供了多种图表创建工具，包括二维和三维图表。以下是在 ArcGIS Pro 中创建图表的方法：### 创建图表1. 数据：选择要用于图表的数据。2. 图表工具：点击“分析”工具栏下的“图表”工具，或使用键盘快捷键 Ctrl+Shift+C。3. 图表类型：从各种图表类型中进行选择，例如柱形图、条形图和饼图。### 自定义图表1. 属性：右键单击图表即可访问其属性。2. 外观：通过调整颜色、标签和其他设置来自定义图表的外观。### 创建 3D 图表1. 3D 可视化：在属性表中启用数据的 3D 可视化，或使用图表中的“3D”按钮工具。2. 图表类型：从各种 3D 图表类型中进行选择，例如 3D 柱形图和 3D 条形图。### 提示和变体* 使用“分析”工具栏访问其他图表工具，例如统计分析和数据处理。* 考虑使用 ArcGIS Pro 的内置模板来创建自定义图表。* 尝试不同的图表类型和自定义选项，找到最适合您数据的可视化效果。按照以下步骤操作，您可以在 ArcGIS Pro 中高效地创建和自定义图表。B机器人的回答要在 ArcGIS Pro 中创建图表，您可以使用以下内置工具：1. 直方图：要创建直方图，请选择该工具并选择输入数据。ArcGIS Pro 会自动选择默认的输出表名称，但您可以根据需要覆盖它。2. 正态 QQ 图：此工具用于可视化分布的正态性。选择该工具，选择输入数据，然后按照向导创建图表。3. 箱线图：要创建箱线图，请选择该工具并选择输入数据。ArcGIS Pro 会自动选择默认的输出表名称，但您可以根据需要覆盖它。此外，您还可以使用其他工具（例如 Z 得分渲染）来进一步分析数据。要应用这些设置并创建图表，请执行以下操作：1. 在主菜单中单击“汇总统计数据”。2. 按照所示输入或进行选择（未提供具体选项）。3. 选择项目的文件地理数据库（在本例中为 Chapter1.gdb）并命名输出表（人口密度统计）。注意：创建图表的具体步骤可能因所使用的工具和处理的数据而异。还值得注意的是，ArcGIS Pro 提供了一系列可视化工具，包括直方图、正态 QQ 图、箱线图、Z 得分渲染等。您可以通过“工具”菜单或功能区中的“分析”选项卡访问这些工具。C机器人的回答在 ArcGIS Pro 中创建图表ArcGIS Pro 提供多种图表类型，包括条形图、饼图、散点图等。用户可以选择最符合自身需求的图表类型，并根据项目需求进行自定义。用户可以使用各种工具和技术来创建图表。例如，他们可以使用流域工具计算流域面积，然后将其用于创建图表。此外，用户可以将图表保存为单独的文件，或通过转到“文件”菜单并选择“另存为”将其嵌入地图。自定义图表ArcGIS Pro 还允许用户使用各种格式选项自定义图表的外观，例如更改元素的颜色、字体和大小 [数据：报表 (16)]。这有助于用户创建外观美观且易于操作的图表。理解。程序化图表创建想要在 ArcGIS Pro 中以程序化方式创建图表的用户可以使用 ArcGIS Pro SDK。这需要一定的编程知识和 ArcGIS Pro API 使用经验。请比较三个回答的全面性、丰富度、启发性、直接性，再选择每个维度中胜出的回答。

|  | A | B | C |
| --- | --- | --- | --- |
| 全面性 | ○ | ○ | ○ |
| 丰富度 | ○ | ○ | ○ |
| 启发性 | ○ | ○ | ○ |
| 直接性 | ○ | ○ | ○ |

25、题目23：如何在 Arcgis Pro 中创建 TIN 表面？ 【矩阵单选题】

A机器人的回答不规则三角网 (TIN) 是一种数据结构，用于通过将 3D 表面分解为三角形元素来表示 3D 表面。以下是在 ArcGIS Pro 中创建 TIN 表面的方法：### 根据高程栅格创建 TIN 表面1. 高程栅格：选择要用于创建 TIN 表面的高程栅格。2. 创建 TIN 工具：点击“分析”工具栏下的“表面”工具，或使用键盘快捷键 Ctrl+Shift+S。3. TIN 选项：选择所需的 TIN 创建选项，例如三角形数量和容差。### 根据要素类创建 TIN 表面1.要素类：选择要用于创建 TIN 表面的要素类。2. 创建 TIN 工具：点击“分析”工具栏下的“表面”工具，或使用键盘快捷键快捷键Ctrl+Shift+S。3. TIN 选项：选择所需的 TIN 创建选项，例如三角形数量和容差。### 自定义 TIN 表面1. 属性：右键单击 TIN 表面以访问其属性。2. 外观：通过调整颜色、标签和其他设置自定义 TIN 表面的外观。### 技巧和变体* 将“表面”工具与其他 3D 分析工具结合使用，以实现更高级的应用。* 考虑使用 ArcGIS Pro 的内置模板创建自定义表面。* 尝试不同的 TIN 创建选项，找到最适合您数据的选项。B机器人的回答要在 ArcGIS Pro 中创建 TIN 面，请按以下步骤操作：1. 在 ArcMap 中插入一个新的数据框。2. 将数据框重命名为“Task 6”。3. 将 emidatin 添加到数据框。4. 点击“确定”。5. 等待 ArcGIS 3D Analyst 根据地形等高线创建 TIN 并将其添加为新图层。6. 关闭 ArcToolbox。或者，在 ArcGIS Pro 中：1. 打开项目并导航到“数据框”选项卡。2. 右键单击数据框，然后选择“添加新数据框”。3. 将新数据框命名为“Task 6”或您喜欢的任何其他名称。4. 将 emidatin 图层添加到新的数据框。5. 转到 3D Analyst 工具栏，然后单击“TIN 面”（或按相应的按钮）。6. 选择等高线图层作为输入要素类。7. 设置 TIN 面的输出位置和名称。8. 点击“确定”创建 TIN 表面。注意：具体步骤可能因您的 ArcGIS Pro 版本和具体要求而异。C机器人的回答在 ArcGIS Pro 中创建 TIN 面TIN（不规则三角网）面是地形数据的 3D 表示，可用于地形分析、可视化和制图等各种应用。要在 ArcGIS Pro 中创建 TIN 面，请按照以下步骤操作：### 步骤 1：准备数据确保高程数据采用合适的格式（例如，ASCII 格网或 LAS 文件）并具有正确的空间参考系统。### 步骤 2：创建新的地形数据集* 转到“**插入**”“**新建地形数据集**”* 选择要保存地形数据集的位置### 步骤 3：将高程数据添加到地形数据集* 右键单击地形数据集，然后选择**添加高程数据*** 选择高程数据文件（例如，ASCII 格网或 LAS 文件）### 步骤 4：创建 TIN 面* 前往**地形分析工具** **创建 TIN 面*** 根据需要选择插值方法（例如，线性插值法、自然邻域插值法）和其他选项### 其他提示和注意事项* 您可以通过应用 ArcGIS Pro 中提供的各种符号系统选项来自定义 TIN 面的外观。* 创建 TIN 面后，您可以使用**3D 分析工具**工具栏中的各种工具来分析和可视化数据，例如计算地形属性、提取等高线或生成坡度图。请比较三个回答的全面性、丰富度、启发性、直接性，再选择每个维度中胜出的回答。

|  | A | B | C |
| --- | --- | --- | --- |
| 全面性 | ○ | ○ | ○ |
| 丰富度 | ○ | ○ | ○ |
| 启发性 | ○ | ○ | ○ |
| 直接性 | ○ | ○ | ○ |
