# Supplementary material for: G-Pro bot: a GraphRAG-powered GIS (Geographical information system) chatbot
Source: PeerJ journal article supplement (doi:10.7717/peerj-cs.3520), 2026-01-26
Supplement: The_questionnaire_English_ver2.docx [file The_questionnaire_English_ver2.docx]

**Survey on the Response Quality of Chatbots in the GIS Field**

Welcome to the Survey on the Response Quality of Chatbots in the GIS Field! This survey contains a substantial amount of text and may take approximately 21-24 minutes to complete. Upon completing the survey carefully, you will be eligible to receive a 5-yuan reward (to ensure survey quality, a minimum response time has been set; responses submitted in less than the required time will not qualify for the reward). We appreciate your participation!

This survey aims to evaluate the response quality of three chatbots trained in the GIS field. You will be presented with responses from three chatbots—A, B, and C—to a set of eight specific questions. After reading their responses, you will evaluate them based on the following four criteria and select the best one:

1. **Comprehensiveness**: Which response covers the most aspects and details (i.e., fully addresses the key points of the question)?
2. **Diversity**: Which response provides the most diverse perspectives and insights (or offers useful information beyond the scope of the question)?
3. **Empowerment**: Which response is most useful in helping you form a judgment?
4. **Directness**: Which response is the clearest and most straightforward in addressing the question?

Please note that the chatbot identities have been anonymized, and your selections should be based solely on the content of the responses rather than the chatbot’s identity. Thank you for your participation!

**Reminder**: This survey is solely for evaluating and optimizing the performance of chatbots in the GIS field. Your feedback is invaluable to us!

**1、What is your role?： [Multiple Choice Question (Single Choice)]**

○ Undergraduate

○ Master's Student (1st Year)

○ Master's Student (2nd Year)

○ Master's Student (3rd Year)

○ Doctoral Student

○ Professor

○ Geography-related Industry Practitioner

○ Environmental Practitioner

**2、What is your major? [Multiple Choice Question (Single Choice)]**

○ Cartography and Geographic Information System

○ Human Geography

○ Physical Geography

○ Resources and Environment

○ Other (Please specify)

**3、Question 1：What are spatial analysis and geospatial analysis? Is there any difference**

**between these terms? (Single Choice)]**

*A-MODEL’S ANSWER:* **Spatial Analysis** and **Geospatial Analysis** are often used interchangeably, but they have distinct meanings.

### Spatial Analysis

Spatial analysis refers to the process of analyzing data that has a geographic component. It involves using various statistical and computational techniques to identify patterns, relationships, and trends within datasets that are linked to specific locations on the Earth's surface. This type of analysis focuses primarily on the spatial aspects of data, such as proximity, distance, and connectivity between different locations.

Some common types of spatial analysis include:

* **Geocoding**: assigning geographic coordinates (latitude and longitude) to addresses or points of interest

* **Spatial interpolation**: estimating values at unsampled locations based on nearby sampled values

* **Buffering**: creating a zone around a point, line, or polygon based on a specified distance

### Geospatial Analysis

Geospatial analysis is a more comprehensive term that encompasses spatial analysis, as well as other techniques and tools used to analyze geographic data. It involves the study of objects, phenomena, and relationships in geographic space using various forms of geospatial data, such as satellite imagery, GPS coordinates, and mapping technologies.

Some key aspects of geospatial analysis include:

* **Geographic Information Systems (GIS)**: a framework for collecting, storing, analyzing, and displaying geographically referenced data

* **Remote Sensing**: the use of sensors to capture data about the Earth's surface from airborne or spaceborne platforms

* **Geovisualization**: the process of creating interactive and dynamic visualizations of geographic data

### Key Differences

While both spatial analysis and geospatial analysis involve the study of geographic data, the primary distinction ies in their scope and focus.

* Spatial analysis is a more specific term that focuses on statistical and computational techniques for analyzing spatial relationships between data points.

* Geospatial analysis is a broader term that encompasses not only spatial analysis but also other techniques,such as GIS, remote sensing, and geovisualization.

Ultimately, the choice of terms depends on the context and specific needs of the project or research endeavor.

*B-MODEL’S ANSWER:* Spatial analysis is a collection of methods, statistics, and techniques that integrates concepts such as location, area, distance, interaction, etc. Geospatial analysis is enriched with GIS capabilities and is used to design new models or integrate existing ones in a GIS environment. It's also an alternative term for "spatial analysis."

*C-MODEL’S ANSWER:* **Understanding Spatial Analysis and Geospatial Analysis**

Spatial analysis and geospatial analysis are two related but distinct concepts that have been extensively studied and applied in various fields. While they share some similarities, there are key differences between the two.

**Definition of Spatial Analysis**

Spatial analysis refers to the process of analyzing data that is associated with geographic locations or spatial relationships [Data: Reports (2, 7, 34, +more)]. It involves using statistical and mathematical techniques to understand patterns, trends, and relationships in spatial data. Spatial analysis can be performed using various methods and tools, including geographic information systems (GIS), remote sensing, and spatial statistics [Data: Reports (6, 7)].

**Definition of Geospatial Analysis**

Geospatial analysis is a broader term that encompasses spatial analysis as one of its components [Data: Reports (938, 938)]. It involves the study of geographically referenced data to understand relationships between different geographic locations and how they interact with each other. Geospatial analysis may involve the use of spatial autocorrelation, spatial regression, and other statistical techniques to analyze and interpret geospatial data [Data: Reports (6)].

**Key Differences**

While both terms are often used interchangeably, there is a subtle difference in connotation or emphasis between them. Spatial analysis tends to focus on the analysis of spatial relationships within a specific geographic area, whereas geospatial analysis takes a more holistic approach by considering the interactions and relationships between different geographic locations [Data: Reports (6)].

**Applications**

Both spatial analysis and geospatial analysis have many practical applications in fields such as urban planning, environmental science, public health, emergency response, and more [Data: Reports (9, 10)]. They can be used to identify patterns and trends in data that may not be immediately apparent through other methods.

**Evolution of the Field**

It's worth noting that the field of spatial analysis and geospatial analysis is constantly evolving, with new techniques and tools being developed all the time. As such, it may be difficult to pin down a precise definition or distinction between these two terms [Data: Reports (7)].

In conclusion, while there are some differences between spatial analysis and geospatial analysis, they share many similarities and are often used interchangeably in practice. The choice of term may depend on the specific context or discipline being referred to.

**Please compare the comprehensiveness, diversity, empowerment, and directness of the three responses, and then select the best response for each dimension.**

|  | A | B | C |
| --- | --- | --- | --- |
| Comprehensiveness | ○ | ○ | ○ |
| Diversity | ○ | ○ | ○ |
| Empowerment | ○ | ○ | ○ |
| Directness | ○ | ○ | ○ |

**4、Question 2：What is classification of measurement levels? (Single Choice)]**

*A-MODEL’S ANSWER:* In the field of statistics and data analysis, measurements are classified into four levels: nominal, ordinal, interval, and ratio.

### Nominal Level

The nominal level represents categorical variables that have no inherent order or hierarchy. Examples include:

* **Gender**: male/female/other

* **Nationality**: American/French/German

* **Colors**: red/blue/green

Nominal variables are used to identify unique categories, but they do not convey any quantitative information.

### Ordinal Level

Ordinal level variables have a natural order or hierarchy, but the differences between consecutive levels may not be equal. Examples include:

* **Education level**: high school/college/bachelor's/master's

* **Job satisfaction**: very dissatisfied/dissatisfied/neither satisfied nor dissatisfied/satisfied/verysatisfied

* **Income level**: low/medium/high

Ordinal variables are used to identify categories with a specific order, but the intervals between consecutive levels may not be equal.

### Interval Level

Interval level variables have a natural order and equal intervals between consecutive levels. Examples include:

* **Temperature in Celsius or Fahrenheit**

* **Time (e.g., clock time)**

* **Weight**

*B-MODEL’S ANSWER:* According to the text, there are three levels of measurement:

1. Nominal (name only)

2. Ordinal (order or ranking)

3. Interval/Ratio (fixed equal units and can perform arithmetic operations)

*C-MODEL’S ANSWER:* **Classification of Measurement Levels**

=====================================

Measurement levels are a fundamental concept in statistics that determine how data should be analyzed and interpreted. There are four main types of measurement levels: nominal, ordinal, interval, and ratio.

**Nominal Scales**

-----------------

Nominal scales are used to categorize data into distinct groups without any inherent order or ranking. Examples include:

* Gender (male/female)

* Nationality (country of origin)

* Brand names

These categories do not have a natural order or hierarchy, and mathematical operations cannot be performed on them.

**Ordinal Scales**

-----------------

Ordinal scales are used to categorize data into distinct groups with an inherent order or ranking. Examples include:

* Educational levels (high school, college, graduate degree)

* Income categories (low, medium, high)

These categories have a natural order or hierarchy, but the intervals between them are not equal.

**Interval Scales**

------------------

Interval scales are used to measure data with equal intervals between consecutive levels. Examples include:

* Temperature in Celsius or Fahrenheit

* Time (hours, minutes, seconds)

These categories have equal intervals between them, but there is no true zero point.

**Ratio Scales**

----------------

Ratio scales are used to measure data with a true zero point and equal intervals between consecutive levels. Examples include:

* Weight

* Height

These categories have a true zero point and equal intervals between them, making them suitable for mathematical operations.

**Implications**

---------------

The classification of measurement levels is crucial in statistics as it determines the type of analysis that can be performed on the data. Nominal scales are often used for categorical variables, while interval and ratio scales are used for continuous variables. Understanding the measurement level of a variable is essential to ensure accurate and meaningful results.

**Conclusion**

----------

In conclusion, the classification of measurement levels is a fundamental concept in statistics that determines how data should be analyzed and interpreted. By understanding the different types of measurement levels (nominal, ordinal, interval, and ratio), researchers can choose the appropriate analysis techniques and ensure accurate and meaningful results.

**Please compare the comprehensiveness, diversity, empowerment, and directness of the three responses, and then select the best response for each dimension.**

|  | A | B | C |
| --- | --- | --- | --- |
| Comprehensiveness | ○ | ○ | ○ |
| Diversity | ○ | ○ | ○ |
| Empowerment | ○ | ○ | ○ |
| Directness | ○ | ○ | ○ |

**5、Question 3：Introduce Kriging and all members of the Kriging family. [Matrix Multiple Choice Question (Single Choice)]**

*A-MODEL’S ANSWER:* Kriging is a popular geostatistical technique used for spatial interpolation, which involves estimating values at unsampled locations based on nearby sampled data points.

###Types of Kriging

The Kriging family includes several types of interpolators that differ in their estimation criteria and assumptions:

* **Simple Kriging**: assumes the variogram model is known exactly

* **Ordinary Kriging** (OK): estimates the mean of the population

* **Universal Kriging** (UK): assumes a non-constant trend

* **Indicator Kriging**: models binary data as indicator variables

Kriging family:

* **Simple Kriging**: assumes known variogram model

* **Ordinary Kriging**: estimates mean of population

* **Universal Kriging**: assumes non-constant trend

* **Indicator Kriging**: models binary data as indicators

*B-MODEL’S ANSWER:* Kriging is a geostatistical method for predicting values at unsampled locations by interpolating between known data points. It is a widely used technique in various fields, including geography, geology, and environmental science.

The Kriging family includes several members, which are:

1. **Ordinary Kriging (OK)**: This is the most commonly used method, which assumes that the underlying process is stationary.

2. **Universal Kriging (UK)**: This method allows for non-stationary processes and can handle multiple variables.

3. **Simple Kriging (SK)**: A more analytical approach to point-interpolation, assuming a known mean and variance.

4. **Indicator Kriging**: Used for categorical or binary data, it estimates the probability of occurrence of an event.

5. **Disjunctive Kriging**: Similar to indicator kriging but used for multiple categories or classes.

6. **Block Kriging**: A method used when the data is grouped into blocks or areas rather than individual points.

These methods differ in their underlying assumptions and the types of data they can handle, allowing users to choose the most suitable technique depending on the specific problem being addressed.

*C-MODEL’S ANSWER:* **Introduction to Kriging**

==========================

Kriging is a geostatistical method used for interpolation, which estimates the value of a variable at an unobserved location based on the values of observed locations. It is widely used in various fields such as geography, geology, and environmental science.

**Members of the Kriging Family**

-------------------------------

The Kriging family consists of several members, each with its own unique characteristics and applications:

### 1. Ordinary Kriging (OK)

---------------------------

Ordinary Kriging is a type of Kriging that estimates the value at an unobserved location based on the values of observed locations without assuming any underlying process. It is widely used for interpolation and has been applied in various fields such as geography, geology, and environmental science.

### 2. Universal Kriging (UK)

---------------------------

Universal Kriging is a generalization of Ordinary Kriging that allows for non-stationary covariance functions and can handle multiple variables. It assumes the underlying process has a known mean and variance.

### 3. Co-Kriging

----------------

Co-Kriging is a type of Kriging that combines multiple variables to estimate the value at an unobserved location. It estimates the value of one variable based on the values of another related variable.

### Other Members

------------------

Other members of the Kriging family include Simple Kriging and Indicator Kriging. However, these methods are not as widely used as Ordinary Kriging, Universal Kriging, and Co-Kriging.

**Conclusion**

----------

In conclusion, Kriging is a powerful geostatistical method for interpolation that has been applied in various fields. The Kriging family consists of several members, each with its own unique characteristics and applications. Understanding the different types of Kriging is essential for selecting the most appropriate method for a given problem.

**Please compare the comprehensiveness, diversity, empowerment, and directness of the three responses, and then select the best response for each dimension.**

|  | A | B | C |
| --- | --- | --- | --- |
| Comprehensiveness | ○ | ○ | ○ |
| Diversity | ○ | ○ | ○ |
| Empowerment | ○ | ○ | ○ |
| Directness | ○ | ○ | ○ |

**6、Question 4：What is Edge Effect and how to counter it? (Single Choice)]**

*A-MODEL’S ANSWER:* The edge effect, also known as the boundary effect or halo effect, occurs when observations near the edges of a study area have artificially inflated variances due to reduced sampling size.

### Why does the Edge Effect occur?

* **Reduced sampling size**: fewer observations near the edges

* **Boundary bias**: increased variance due to lack of neighboring points

* **Edge-induced heterogeneity**: differences between edge and interior observations

To counter the edge effect:

1. **Clip or trim data**:

* Remove edge rows and columns from your dataset

* Use only central cells (e.g., ignoring corner cells)

2. **Use edge-adjusted methods**: apply special techniques to reduce boundary effects:

* **Boundary bias correction**

* **Spatial filtering**

### Edge-Adjusted Methods

To further minimize the edge effect:

* **Neighborhood analysis**: focus on areas with sufficient neighboring points

* **Distance-weighting**: assign lower weights to edge observations

*B-MODEL’S ANSWER:* Edge effects occur when events or point locations near the edge of a study area are affected by the boundaries, leading to pronounced discrepancies in results due to small number of events. To counter this issue, various edge correction techniques can be employed:

1. **Guard zones**: Creating buffer areas around the edges.

2. **Simulating outer boundaries**: Extending or creating virtual boundaries.

3. **Shrinking the study area**: Reducing the size of the area being studied.

4. **Ripley's edge correction formula**: A mathematical approach to correct for edge effects.

Additionally, the Monte Carlo simulation approach can be used as a more reliable method to account for edge effects in spatial analysis and conflation procedures.

*C-MODEL’S ANSWER:* **Edge Effect: Understanding its Causes and Consequences**

Edge effect refers to the changes that occur at the boundary between two different environments or ecosystems, such as a forest and a grassland. These changes can have significant impacts on the species living in these areas, leading to altered population dynamics, behavior, and even extinction.

### Causes of Edge Effect

The causes of edge effect are varied and complex, but some of the main factors include:

* **Habitat fragmentation**: The division of habitats into smaller patches, leading to reduced habitat quality and increased isolation.

* **Edge-related microclimates**: Changes in temperature, humidity, and light levels at the edge of a habitat, which can be detrimental to certain species.

* **Increased predation**: The presence of predators at the edge of a habitat can lead to increased predation pressure on prey species.

### Consequences of Edge Effect

The consequences of edge effect are far-reaching and can have significant impacts on ecosystems. Some of the main effects include:

* **Species extinction**: The loss of species due to altered population dynamics and reduced habitat quality.

* **Changes in ecosystem processes**: Altered nutrient cycling, water flow, and other ecosystem processes can occur at the edge of a habitat.

* **Reduced biodiversity**: The reduction of species richness and evenness at the edge of a habitat.

### Countering Edge Effect

To counter edge effect, several strategies can be employed:

* **Habitat restoration**: Restoring degraded or fragmented habitats to improve their quality and connectivity.

* **Edge management**: Managing the edge of a habitat to reduce its impact on species living in it. This can include techniques such as thinning vegetation, pruning trees, or creating buffer strips.

* **Conservation planning**: Developing conservation plans that take into account the impacts of edge effect and aim to mitigate them.

**Please compare the comprehensiveness, diversity, empowerment, and directness of the three responses, and then select the best response for each dimension.**

|  | A | B | C |
| --- | --- | --- | --- |
| Comprehensiveness | ○ | ○ | ○ |
| Diversity | ○ | ○ | ○ |
| Empowerment | ○ | ○ | ○ |
| Directness | ○ | ○ | ○ |

**7、Question 5：what are uses of GIS? [Matrix Multiple Choice Question (Single Choice)]**

*A-MODEL’S ANSWER:* GIS (Geographic Information System) is a powerful tool that enables users to collect, analyze, and display geographically referenced data. Here are some examples of the diverse range of applications where GIS can be used:

### Natural Resource Management

1. **Land use planning**: Identify suitable areas for development, conservation, or resource extraction.

2. **Water resources management**: Analyze and manage water quality, quantity, and distribution.

3. **Wildlife habitat analysis**: Identify and preserve habitats for endangered species.

### Urban Planning and Development

1. **Infrastructure planning**: Optimize placement of roads, utilities, and other infrastructure.

2. **Zoning regulations**: Ensure compliance with zoning laws and ordinances.

3. **Emergency response planning**: Prepare for natural disasters and emergencies.

### Environmental Monitoring and Conservation

1. **Climate change analysis**: Track changes in temperature, precipitation, and sea levels.

2. **Air quality monitoring**: Analyze pollutant concentrations and identify sources.

3. **Soil degradation assessment**: Monitor soil erosion, salinization, and nutrient depletion.

### Transportation Planning and Management

1. **Route optimization**: Find the most efficient routes for logistics, delivery, or emergency services.

2. **Traffic analysis**: Identify congestion hotspots and optimize traffic flow.

3. **Public transportation planning**: Design effective public transit systems.

### Disaster Response and Recovery

1. **Damage assessment**: Analyze damage from natural disasters like hurricanes, earthquakes, or wildfires.

2. **Resource allocation**: Optimize resource distribution for disaster response efforts.

3. **Recovery planning**: Inform post-disaster recovery initiatives.

These examples illustrate the breadth of GIS applications across various fields and industries.

*B-MODEL’S ANSWER:* According to the text, some uses of GIS (Geographic Information System) include:

1. Integrating data-management techniques to aid in interpreting spatial data sets.

2. Leveraging geospatial data for continued success.

3. Creating new applications and end-users by providing meaningful data.

These uses highlight the importance of GIS as a tool that helps answer questions about geographic locations or areas, making it a crucial system for various fields and industries.

*C-MODEL’S ANSWER:* **Uses of Geographic Information Systems (GIS)**

GIS has a wide range of applications across various fields, including:

### 1. **Transportation Planning**

* Analyze traffic flow, road network optimization, and public transit systems [Data: Reports (13, 14, 15)]

* Study transportation networks, including routes, traffic patterns, and infrastructure development [Data: Reports (3, 4)]

### 2. **Environmental Management**

* Calculate watershed areas for rivers [Data: Relationships (4881)]

* Analyze plant distribution patterns and root systems [Data: Reports (7360)]

### 3. **Urban Planning**

* Map and analyze population density to identify areas of high population growth and resource allocation needs [Data: Entities (9669), Data: Reports (9047)]

* Study geological structures and processes in the field of geology [Data: Reports (5, 6)]

### 4. **Disaster Response and Recovery**

* Use GIS for disaster response and recovery efforts [Data: Reports (12, 13)]

* Create interactive maps and web applications for public engagement and education [Data: Reports (13, 14, 15)]

### 5. **Education and Research**

* Teach geographic concepts and skills in educational settings [Data: Reports (10, 11)]

* Analyze relationships between different entities in a system, such as plant distribution and root systems [Data: Reports (7360)]

### 6. **Data Management and Storage**

* Use GIS for data management and storage in communities [Data: Reports (923)]

* Collaborate and coordinate between entities, such as the PLANNING DEPARTMENT and CHAPTER5 DATA [Data: Reports (923)]

These are just a few examples of the many uses of GIS. The technology has far-reaching applications across various fields, making it an essential tool for data analysis, visualization, and decision-making.

**Note:** This response is based on the provided analysts' reports, which have been ranked in descending order of importance. The information presented here represents the most relevant and accurate findings from these reports.

**Please compare the comprehensiveness, diversity, empowerment, and directness of the three responses, and then select the best response for each dimension.**

|  | A | B | C |
| --- | --- | --- | --- |
| Comprehensiveness | ○ | ○ | ○ |
| Diversity | ○ | ○ | ○ |
| Empowerment | ○ | ○ | ○ |
| Directness | ○ | ○ | ○ |

**8、Question 6：List the examples of Applications of Geographic Information Systems in Urban Planning and Management. [Matrix Multiple Choice Question (Single Choice)]**

*A-MODEL’S ANSWER:* Here are some examples of Applications of Geographic Information Systems (GIS) in urban planning and management:

### Transportation Planning

1. **Optimizing public transit routes**: Use GIS to identify the most efficient routes for buses, trains, or other forms of public transportation.

2. **Analyzing traffic patterns**: Identify congestion hotspots and optimize traffic flow using real-time data.

### Land-Use Planning

1. **Zoning regulations enforcement**: Use GIS to ensure compliance with zoning laws and ordinances.

2. **Identifying suitable areas for development**: Analyze geographic characteristics such as terrain, soil quality, or environmental sensitivity.

### Infrastructure Management

1. **Water management**: Optimize water distribution systems, identify leaks, and manage water resources using GIS.

2. **Waste management**: Track waste generation, collection routes, and disposal sites to improve efficiency.

### Emergency Response Planning

1. **Emergency response route planning**: Use GIS to identify the most efficient routes for emergency responders during natural disasters or other emergencies.

2. **Resource allocation**: Optimize resource distribution for disaster response efforts using GIS.

### Public Health and Safety

1. **Identifying health risk areas**: Analyze geographic data on disease outbreaks, environmental hazards, or socioeconomic factors to identify areas of concern.

2. **Developing emergency response plans**: Use GIS to inform emergency response planning and resource allocation.

These examples demonstrate how GIS can be applied in urban planning and management to improve the quality of life for citizens and optimize resource use.

*B-MODEL’S ANSWER:* Here are some examples of applications of Geographic Information Systems (GIS) in Urban Planning and Management:

1. The delivery of utilities and planning for service interruptions.

2. Spatial modeling, especially in areas such as:

a. 3D printing

b. Water main breaks

c. Participatory GIS

These applications improve the ability to visualize, analyze, and model urban data, facilitating more informed decision-making in urban planning and management.

*C-MODEL’S ANSWER:* ### Applications of Geographic Information Systems in Urban Planning and Management ###

Geographic Information Systems (GIS) play a crucial role in urban planning and management by providing insights into various aspects of city development, infrastructure, and services. The following are some key applications of GIS in this field:

#### 1. Population Density Analysis ####

Creating a population density field named POP_DEN is an essential task in urban planning and management. This helps in understanding the distribution of population within the city, which can inform decisions on resource allocation, infrastructure development, and service provision.

#### 2. Urban Economic Analysis ####

GIS can be applied to analyze the economic impact of urban development on the environment and make informed decisions about sustainable development. This includes analyzing the impact of different development scenarios on the city's infrastructure and services.

#### 3. Environmental Impact Assessment ####

Urban planners can use GIS to evaluate the environmental impact of development projects and identify areas for sustainable development. This involves analyzing the potential effects of development on the environment, including pollution, climate change, and natural disasters.

#### 4. Emergency Response Planning and Disaster Risk Reduction ####

GIS is used in urban management for tasks like emergency response planning and disaster risk reduction. This includes creating maps and models that simulate the impact of different development scenarios on the city's infrastructure and services.

#### 5. Smart City Development ####

GIS can aid in the creation of smart cities by integrating data from various sources, including sensors, social media, and IoT devices. This enables urban managers to make informed decisions about resource allocation, infrastructure development, and service provision.

### Key Points and Implications ###

* GIS is a powerful tool for urban planning and management, providing insights into population density, economic analysis, environmental impact assessment, emergency response planning, and disaster risk reduction.

* Urban planners can use GIS to create maps and models that simulate the impact of different development scenarios on the city's infrastructure and services.

* GIS can aid in the creation of smart cities by integrating data from various sources.

* The use of GIS in urban planning and management can help reduce costs and optimize resource allocation.

**Please compare the comprehensiveness, diversity, empowerment, and directness of the three responses, and then select the best response for each dimension.**

|  | A | B | C |
| --- | --- | --- | --- |
| Comprehensiveness | ○ | ○ | ○ |
| Diversity | ○ | ○ | ○ |
| Empowerment | ○ | ○ | ○ |
| Directness | ○ | ○ | ○ |

**9、Question 7：What are the applications of GIS in the field of crime? [Matrix Multiple Choice Question (Single Choice)]**

*A-MODEL’S ANSWER:* GIS (Geographic Information System) is increasingly being used in the field of crime analysis, helping law enforcement agencies to better understand and combat criminal activity.

### Crime Mapping

1. **Spatial distribution**: Analyze the spatial distribution of crimes to identify patterns and hotspots.

2. **Crime rates**: Calculate crime rates by area or neighborhood to inform policing strategies.

### Predictive Policing

1. **Predicting crime locations**: Use GIS to analyze historical crime data and predict where future crimes are likely to occur.

2. **Identifying high-risk areas**: Identify areas with a high likelihood of criminal activity using GIS analysis.

### Tactical Operations Planning

1. **Optimizing patrol routes**: Use GIS to identify the most efficient patrol routes for police officers.

2. **Resource allocation**: Allocate resources such as personnel, equipment, and budget based on geographic and demographic data.

### Intelligence-Led Policing

1. **Identifying criminal networks**: Analyze geographic and network data to understand the relationships between individuals and groups involved in criminal activity.

2. **Informing strategic decisions**: Use GIS to inform strategic decisions about policing strategies and resource allocation.

These examples demonstrate how GIS can be applied in the field of crime analysis to improve law enforcement efforts and reduce crime rates.

*B-MODEL’S ANSWER:* The applications of Geographic Information Systems (GIS) in the field of crime include:

- Crime identification

- Crime mapping

- Crime investigation

- Displaying spatial patterns of events

- Crime prediction

These applications showcase the strength of GIS in analyzing and explaining criminal activity in a spatial context.

*C-MODEL’S ANSWER:* **Applications of GIS in Crime Analysis**

Geographic Information Systems (GIS) have become an essential tool in crime analysis, providing valuable insights to law enforcement agencies and policymakers. The following sections summarize the key applications of GIS in crime analysis.

### Crime Pattern Identification and Mapping

GIS enables the identification of crime hotspots and patterns, allowing for targeted interventions and resource allocation. Analysts have used GIS to map crime locations, types, and frequencies, revealing correlations between crime and demographic factors such as poverty, unemployment, and population density.

### Crime Scene Investigation and Reconstruction

GIS is used in forensic analysis to reconstruct crime scenes, analyze evidence, and piece together events. This helps investigators to identify suspects, track their movements, and gather evidence.

### Crime Prevention and Reduction Strategies

GIS can be used to identify areas with high levels of crime and poverty, allowing for targeted interventions and resource allocation. Analysts have also used GIS to develop strategies for prevention and intervention, such as community policing and crime prevention programs.

### Communication and Public Awareness

GIS can help law enforcement agencies communicate with the public and provide information about crime trends and safety concerns. This enhances transparency and builds trust between law enforcement and the community.

### Limitations and Future Directions

While GIS has shown promise in crime analysis, there is limited evidence on its effectiveness in preventing and reducing crime. Further research is needed to fully understand the potential of GIS in this field.

In conclusion, GIS has numerous applications in crime analysis, from identifying crime patterns and hotspots to reconstructing crime scenes and developing prevention strategies. However, more research is required to fully harness its potential and address concerns around privacy and data security.

**Please compare the comprehensiveness, diversity, empowerment, and directness of the three responses, and then select the best response for each dimension.**

|  | A | B | C |
| --- | --- | --- | --- |
| Comprehensiveness | ○ | ○ | ○ |
| Diversity | ○ | ○ | ○ |
| Empowerment | ○ | ○ | ○ |
| Directness | ○ | ○ | ○ |

**10、Question 8：What is the use of GIS in various fields of Oceanography? [Matrix Multiple Choice Question (Single Choice)]**

*A-MODEL’S ANSWER:* GIS (Geographic Information System) has numerous applications in various fields of oceanography, enabling researchers and scientists to better understand the complex interactions between the ocean and its surrounding environment.

### Ocean Currents and Circulation

1. **Tracking ocean currents**: Analyze historical data on ocean currents using GIS to identify patterns and changes.

2. **Predicting ocean circulation**: Use GIS to model future changes in ocean circulation based on climate projections.

### Marine Ecosystems

1. **Mapping marine habitats**: Create detailed maps of marine ecosystems, including coral reefs, estuaries, and mangroves.

2. **Analyzing species distribution**: Identify areas with high biodiversity using GIS analysis.

### Coastal Management

1. **Identifying erosion hotspots**: Analyze historical data on coastal erosion to identify areas at risk.

2. **Planning coastal development**: Use GIS to inform decisions about coastal development, such as the placement of seawalls or jetties.

### Climate Change Research

1. **Analyzing ocean acidification**: Model and analyze changes in ocean pH levels due to increased CO2 emissions.

2. **Investigating sea-level rise**: Use GIS to model and predict future sea-level rise based on

climate projections.

### Marine Geology

1. **Mapping seafloor topography**: Create detailed maps of the seafloor using GIS analysis of bathymetric data.

2. **Identifying oceanic hazards**: Analyze historical data on natural disasters such as tsunamis and earthquakes to identify areas at risk.

These examples demonstrate how GIS can be applied in various fields of oceanography to improve our understanding of the complex interactions between the ocean and its surrounding environment, ultimately informing decisions about resource management and conservation.

*B-MODEL’S ANSWER:* The use of GIS in various fields of oceanography includes data distribution tools, mapping tools, and monitoring analysis tools for coastal zone assessment and management. It also involves the main sampling methods and online sources of spatially referenced oceanographic data, as well as application examples on how GIS contributes to the mapping of certain oceanographic phenomena. Additionally, GIS is used in almost any aspect of oceanographic research combining a variety of georeferenced data from on-board research surveys as well as oceanographic GIS applications in coastal environments and the open ocean.

*C-MODEL’S ANSWER:* **The Use of GIS in Various Fields of Oceanography**

GIS (Geographic Information System) plays a crucial role in various fields of oceanography, enabling researchers to collect, analyze, and visualize large datasets. The use of GIS in oceanography has numerous applications, including:

### 1. **Ocean Climate Modeling**

GIS is used to study the interactions between the oceans and atmosphere, helping researchers understand the impacts of climate change on ocean circulation, sea level rise, and other phenomena.

### 2. **Coastal Zone Management**

GIS is employed in coastal zone management to assess the impact of human activities on coastal ecosystems, track fish populations, monitor fishing activities, and develop sustainable fishing practices.

### 3. **Underwater Exploration and Mapping**

GIS is used in underwater exploration and mapping to create detailed maps of seafloor topography and identify new areas for scientific research.

### 4. **Ocean Acidification Research**

GIS is used to study the impacts of changing ocean chemistry on marine ecosystems, helping scientists understand the complex relationships between ocean acidification and other climate change factors.

### 5. **Coastal Erosion Modeling**

GIS is used in coastal erosion modeling to predict and mitigate the impact of sea level rise on coastal communities.

### 6. **Fisheries Management**

GIS is used in fisheries management to track fish populations, monitor fishing activities, and develop sustainable fishing practices.

The use of GIS in oceanography has numerous benefits, including:

* Improved data visualization and analysis

* Enhanced understanding of complex relationships between oceanic and atmospheric processes

* Better management of coastal ecosystems and fisheries

* Identification of new areas for scientific research

Overall, the application of GIS in various fields of oceanography is crucial for advancing our understanding of the world's oceans and mitigating the impacts of climate change.”

**Please compare the comprehensiveness, diversity, empowerment, and directness of the three responses, and then select the best response for each dimension.**

|  | A | B | C |
| --- | --- | --- | --- |
| Comprehensiveness | ○ | ○ | ○ |
| Diversity | ○ | ○ | ○ |
| Empowerment | ○ | ○ | ○ |
| Directness | ○ | ○ | ○ |

**11、Question 9：List the FISHERIES GIS TOOLS AND INITIATIVES. (Single Choice)]**

*A-MODEL’S ANSWER:* Here are some key fisheries GIS tools and initiatives:

### Fisheries GIS Tools

1. **FISHBASE**: A database of fish species and their ecological data, which can be analyzed using GIS.

2. **Fisheries GIS Tool (FGT)**: A software tool for analyzing and visualizing fisheries data, including catch rates, fishing effort, and marine protected areas.

3. **Marine Ecosystems GIS Tool**: A tool for creating detailed maps of marine ecosystems, including fish habitats and migration routes.

### Fisheries Initiatives

1. **Fisheries Management Information System (FMIS)**: A global initiative to develop a standardized system for managing fisheries data, using GIS and other technologies.

2. **Regional Fisheries Management Councils**: Many countries have established regional councils that use GIS to manage fisheries resources and make informed decisions about fishery regulations.

3. **Marine Protected Areas (MPAs)**: MPAs are designated areas where human activities are restricted to protect marine biodiversity, often using GIS to identify and map protected areas.

### International Initiatives

1. **United Nations Food and Agriculture Organization (FAO) Fisheries Department**: The FAO's fisheries department works with countries to develop and implement sustainable fisheries management practices, including the use of GIS.

2. **The Ocean Conservancy**: A global organization that uses GIS and other technologies to identify and address ocean conservation issues, including overfishing.

3. **The Marine Conservation Institute (MCI)**: MCI works with governments and NGOs to protect marine ecosystems using a range of tools, including GIS.

These are just a few examples of the many fisheries GIS tools and initiatives in existence.

*B-MODEL’S ANSWER:* Based on the text, here are some Fisheries GIS tools and initiatives mentioned:

1. Integration of hydrology and ecology for GIS models

2. Identifying targets for fisheries applications using GIS

3. Organizing fisheries statistical data for GIS applications

4. Development of fisheries GIS databases

5. Utilization of remote sensing (RS) data in fisheries GIS

Note that the text does not provide an exhaustive list, but rather highlights some specific initiatives and tools mentioned within the context of the book.

*C-MODEL’S ANSWER:* ### Geographic Information Systems (GIS) are widely used in fisheries (inland and marine) and aquaculture fields, with many worldwide organizations adopting them for database and visualization methods in recent years. The Food and Agriculture Organization of the United Nations (FAO) is a key driver in the application of GIS in these areas.

The FAO developed the Fisheries Global Information System (FIGIS), an Internet-based interactive system designed to provide policymakers with timely and reliable strategic information on fishery status and trends globally. FIGIS will offer spatial and other information on aquatic species, marine resources, marine fisheries, and fishing technologies. It aims to support policymakers in shifting towards sustainability-centered management by providing a single entry point to strategic data, information, analyses, and reviews of fisheries issues and trends. The FAO has also established an online worldwide Atlas of Tuna and Billfish Catches, which features excellent GIS maps of fisheries information for these species.

Other significant projects and initiatives include:

NOAA's National Ocean Service: Initiated projects under the Biogeography Programme to develop knowledge and products on living marine resource distributions and ecology. A major focus is on the identification and management of Essential Fish Habitat (EFH), where GIS is extensively used to overlay species distribution with habitat features.

The Fisheries Centre at the University of British Columbia (FC): Provides a wide range of fisheries products, including online publications and software like "Ecopath with Ecosim," which helps construct models of trophic flows in marine and freshwater ecosystems.

The Fisheries Information and Analysis System (FIAS): An ongoing project aimed at strengthening capacities for improved resource management in Northwest Africa. It includes a GIS module to integrate fisheries-related data and other datasets.

The VIBES Project: An applied research program focused on the viability of exploited pelagic fish resources in the Benguela Ecosystems, producing a GIS as an aid for assessing relationships between the environment, resources, and exploitation.

The International Research Institute for Climate Prediction: Utilizes satellite information to study oceanographic conditions off the coast of Peru and compare observations with the Peruvian catch of small pelagic fish, aiming to quantify the impact of El Nino conditions on fish catch.

The Great Lake Fisheries GIS: A well-established monitoring and management system for fisheries resources of the Great Lakes, linking a 10x10 inch statistical "rectangle" monitoring system to an extensive GIS database.

GIS applications in a European context: The Common Fisheries Policy (CFP) of the European Communities is integrating environmental considerations into fisheries policy-making, where GIS use is profound. MarLIN provides comprehensive information on marine habitats, communities, and species, developing GIS databases for identifying "sensitivity" and "recoverability". The Fisheries GIS Unit (Canterbury Christ Church University College, UK) developed FISHCAM, an electronic fisheries data log system based on GIS, used globally.

The FAO COPEMED Project: Highlights the significant role of GIS in fisheries management, emphasizing the importance of a spatial approach for decision-makers and the need to link GIS with other database management systems and numerical models.

Overall, GIS is increasingly applied in the fisheries sector, playing a crucial role in data management, visualization, model building, policy formulation, and resource management.

**Please compare the comprehensiveness, diversity, empowerment, and directness of the three responses, and then select the best response for each dimension.**

|  | A | B | C |
| --- | --- | --- | --- |
| Comprehensiveness | ○ | ○ | ○ |
| Diversity | ○ | ○ | ○ |
| Empowerment | ○ | ○ | ○ |
| Directness | ○ | ○ | ○ |

**12、Question 10：what are the types of data used for surface-water hydrology studies? (Single Choice)]**

*A-MODEL’S ANSWER:* Surface-water hydrology studies require various types of data to understand and analyze the movement, behavior, and characteristics of surface water.

### Hydrologic Data

1. **Stream flow data**: Measurement of water level and discharge at specific points along streams or rivers.

2. **Water quality data**: Measurement of physical and chemical properties such as pH, temperature, turbidity, and nutrient levels.

3. **Sediment data**: Measurement of sediment loads, sizes, and types to understand erosion and deposition processes.

### Topographic Data

1. **Digital elevation models (DEMs)**: Raster or vector data sets representing the terrain's topography.

2. **LiDAR (Light Detection and Ranging) data**: High-resolution 3D measurements of the terrain, including vegetation height and water surface elevations.

### Meteorological Data

1. **Precipitation data**: Measurement of rainfall, snowfall, or other forms of precipitation at specific locations.

2. **Evaporation data**: Measurement of evaporation rates from surfaces such as lakes, reservoirs, or wetlands.

3. **Atmospheric temperature and humidity data**: Measurement of air temperature and humidity levels to estimate energy transfer between the atmosphere and surface water.

### Hydrogeologic Data

1. **Groundwater level data**: Measurement of groundwater elevations at specific wells or piezometers.

2. **Water table maps**: Raster or vector representations of the water table's elevation and extent.

### Land Use/Land Cover Data

1. **Land use classification**: Classification of land uses such as agricultural, urban, forest, or wetland.

2. **Land cover classification**: Classification of land cover types such as vegetation, soil, rock, or water bodies.

These data sets provide essential information for surface-water hydrology studies, allowing researchers and practitioners to model, analyze, and predict the behavior of surface water in various environments.

*B-MODEL’S ANSWER:* The types of data used for surface-water hydrology studies are not explicitly stated in the provided text. However, based on the context, it can be inferred that the types of data required include:

1. Digital elevation model (DEM) data

2. Real-time monitoring data

3. Archival databases

4. Linked models

These types of data are mentioned in separate sections or chapters within the text as being relevant to surface-water hydrology studies and modeling.

*C-MODEL’S ANSWER:* #### Types of Data Used for Surface-Water Hydrology Studies ###

Surface-water hydrology studies involve the collection and analysis of various types of data to understand the characteristics, behavior, and impacts of water bodies. The following are some of the key types of data used in surface-water hydrology studies:

#### 1. Field Measurements ####

Field measurements are essential for collecting data on surface-water hydrology. These datasets may include parameters such as pH, temperature, dissolved oxygen levels, and other physical and chemical characteristics of water bodies [Data: Reports (6, 7)].

#### 2. Streamflow Data ####

Streamflow data is used to measure the flow rate of rivers and streams [Data: Reports (6, 7)]. This type of data is crucial for understanding the hydrological cycle and predicting flood events or droughts.

#### 3. Water Quality Data ####

Water quality data is used to assess the chemical, physical, and biological characteristics of water bodies [Data: Reports (8, 9)].

#### 4. Remote Sensing Data ####

Remote sensing data, such as satellite imagery, may be used to monitor water levels, detect changes in the water cycle, and analyze spatial relationships between cells [Data: Reports (2, 7, +more)]. This type of data is useful for large-scale monitoring and analysis.

#### 5. Census Data ####

Census.gov provides access to official census data, which may be used in surface-water hydrology studies to understand population dynamics and their impact on water resources [Data: Reports (4720)].

### Additional Types of Data ###

Other types of data that may be used in surface-water hydrology studies include:

* Field measurements of water temperature, pH, and other physical and chemical parameters [Data: Reports (1, 3)]

* Kriging technique for advanced data processing and analysis [Data: Reports (7186)]

* LITTORAL ZONE GIS OF LAKE CONSTANCE may have a moderate impact on the community's dynamics in terms of surface-water hydrology studies [Data: Entities (12956), Relationships (1060)]

### Implications ###

The types of data used in surface-water hydrology studies are diverse and depend on the specific research question or goal. Understanding the characteristics, behavior, and impacts of water bodies requires a comprehensive approach that incorporates multiple types of data. The use of remote sensing data, field measurements, and census data can provide valuable insights into the complex relationships between water resources and human activities.

Note that the data references provided are a selection of the most relevant ones mentioned in the analysts' reports. There may be additional data references not included in this response.

**Please compare the comprehensiveness, diversity, empowerment, and directness of the three responses, and then select the best response for each dimension.**

|  | A | B | C |
| --- | --- | --- | --- |
| Comprehensiveness | ○ | ○ | ○ |
| Diversity | ○ | ○ | ○ |
| Empowerment | ○ | ○ | ○ |
| Directness | ○ | ○ | ○ |

**13、Question 11：I'm mapping floodplain, what kinds of data should I use? [Matrix Multiple Choice Question (Single Choice)]**

*A-MODEL’S ANSWER:* When mapping a floodplain, you'll want to use data that captures the terrain's topography, hydrology, and land cover characteristics.

### Topographic Data

1. **Digital Elevation Models (DEMs)**: These raster or vector datasets represent the terrain's elevation, slope, and aspect.

2. **LiDAR (Light Detection and Ranging) data**: High-resolution 3D measurements of the terrain, including vegetation height and water surface elevations.

### Hydrologic Data

1. **Stream flow data**: Measurement of water level and discharge at specific points along streams or rivers.

2. **Flood frequency analysis data**: Analysis of historical flood events to determine recurrence intervals and peak discharges.

3. **Water table maps**: Raster or vector representations of the water table's elevation and extent.

### Land Use/Land Cover Data

1. **Land use classification**: Classification of land uses such as agricultural, urban, forest, or wetland.

2. **Land cover classification**: Classification of land cover types such as vegetation, soil, rock, or water bodies.

### Other Data

1. **Bathymetric data**: Measurement of lake or river depths to accurately represent water levels and floodplain extent.

2. **Geologic data**: Information on the underlying geology, including aquifer locations and characteristics.

3. **Soil data**: Classification of soil types and properties to understand infiltration rates and water holding capacities.

By incorporating these various data sets into your mapping project, you can create an accurate representation of the floodplain's topography, hydrology, and land cover characteristics. This will help inform decision-making for flood risk management, mitigation, and adaptation strategies.

*B-MODEL’S ANSWER:* You should use a digital elevation model (DEM) and land-parcel data to determine the water surface elevation–damage curves for each land use in a stream reach.

*C-MODEL’S ANSWER:* ### Floodplain Mapping Data Requirements ###

To generate an accurate floodplain map, it is essential to integrate various datasets that provide information on the floodplain's morphology, changes over time, and potential flood risks. The following sections summarize the key findings from multiple analysts who focused on different parts of the dataset.

#### 1. Geographic Information Systems (GIS) Software ###

Use GIS software to integrate and analyze the various datasets and create a comprehensive floodplain map.

#### 2. Satellite Imagery and Aerial Photography ###

Satellite imagery and aerial photography can provide visual information on the floodplain's morphology and changes over time. This data type is particularly useful for identifying areas with high water retention capacity.

#### 3. Geological Data ###

Geological data such as soil type and aquifer characteristics can help identify areas with high flood risk. Additionally, geological data like soil moisture can aid in identifying areas with high water-holding capacity.

#### 4. Watershed Analysis ###

The Watershed Tool calculates watershed areas, which are then used to create the Watershed Output. This suggests that understanding and managing watershed areas is crucial for floodplain mapping and may have implications for environmental management and conservation efforts.

#### 5. Spatial Autocorrelation Analysis ###

ANSELIN LOCAL MORAN'S I is a key entity in this community, being a tool used to calculate local spatial autocorrelation of income, which may impact floodplain management.

**Please compare the comprehensiveness, diversity, empowerment, and directness of the three responses, and then select the best response for each dimension.**

|  | A | B | C |
| --- | --- | --- | --- |
| Comprehensiveness | ○ | ○ | ○ |
| Diversity | ○ | ○ | ○ |
| Empowerment | ○ | ○ | ○ |
| Directness | ○ | ○ | ○ |

**14、Question 12：what is spatial data?Give me some examples of Data Types Included in Spatial Data. (Single Choice)]**

*A-MODEL’S ANSWER:* Spatial data refers to any information that includes geographic or spatial coordinates, allowing it to be visualized on a map and analyzed using geographic information systems (GIS). This type of data can include both point data (e.g., addresses) and polygon data (e.g., land boundaries).

### Examples of Data Types Included in Spatial Data

1. **Address points**: Store locations with latitude, longitude, and address details.

2. **Land parcel boundaries**: Represent property lines and shapes using polygons or polylines.

3. **Street networks**: Include road geometry, traffic patterns, and turn restrictions.

4. **Geological formations**: Display subsurface geology using raster data (e.g., DEMs) or vector data (e.g., polygon layers).

5. **Hydrology features**: Represent rivers, lakes, and other water bodies as polygons or polylines.

6. **Topographic surfaces**: Model terrain elevation and slope using raster data (e.g., DEMs) or vector data (e.g., TINs).

7. **Land cover classifications**: Categorize land into different types (e.g., forest, grassland, urban areas).

8. **Population demographics**: Display population density and distribution using point data.

9. **Economic indicators**: Visualize economic trends (e.g., GDP per capita) as raster or vector layers.

10. **Environmental monitoring data**: Track pollution levels, temperature, and other environmental factors over time.

These examples illustrate the diversity of data types included in spatial data, which can be used for a wide range of applications, from urban planning to climate modeling.

*B-MODEL’S ANSWER:* Spatial data refers to any information that has a geographical location or reference, such as:

Data Types Included in Spatial Data:

- Points (e.g., geographic coordinates, addresses)

- Lines (e.g., roads, borders)

- Areas (e.g., polygons representing countries, states)

- Fields (e.g., elevation, temperature)

These data types can be used to analyze and visualize patterns, relationships, and trends within a geographical context.

*C-MODEL’S ANSWER:* **What is Spatial Data?**

Spatial data refers to any information that has a geographic location or reference, such as latitude and longitude coordinates. It can be used to represent various types of data, including points, lines, polygons, rasters, and networks.

**Examples of Data Types Included in Spatial Data**

Some common examples of spatial data include:

* Points: Represented by latitude and longitude coordinates, these are used to mark specific locations on a map.

* Lines: Used to represent routes or paths between two points, such as roads or rivers.

* Polygons: Represent areas on a map, such as countries or buildings.

* Rasters: Used to represent continuous data, such as elevation or temperature.

**Common Formats for Storing and Exchanging Spatial Data**

Spatial data can be stored and exchanged in various formats, including:

* Shapefiles

* GeoJSON

* KML

These formats allow for the efficient storage and transfer of spatial data between different systems and applications [Data: Reports (6, 8)].

**Sources of Spatial Data**

Spatial data can be collected from various sources, including:

* GPS devices

* Satellite imagery

* Field observations

It is often used in conjunction with other types of data to provide a more comprehensive understanding of the world [Data: Reports (9, 10)].

**Applications of Spatial Data**

Spatial data has numerous applications across various fields, including:

* Geographic Information Systems (GIS)

* Mapping services

* Location-based services

* Urban planning

* Environmental monitoring

* Emergency response

These applications rely on spatial data to provide insights and make informed decisions [Data: Reports (2, 4)].

**Additional Examples of Spatial Data**

Some additional examples of spatial data include:

* Population density maps

* Climate models

* Traffic patterns

These types of data are used to understand and analyze various aspects of the world, from human populations to environmental phenomena [Data: Reports (+more)].

**Please compare the comprehensiveness, diversity, empowerment, and directness of the three responses, and then select the best response for each dimension.**

|  | A | B | C |
| --- | --- | --- | --- |
| Comprehensiveness | ○ | ○ | ○ |
| Diversity | ○ | ○ | ○ |
| Empowerment | ○ | ○ | ○ |
| Directness | ○ | ○ | ○ |

**15、Question 13：What is Map Projection? (Single Choice)]**

*A-MODEL’S ANSWER:* Map projection is a process of mathematically transforming geographical features from the Earth's surface (a three-dimensional sphere or ellipsoid) onto a two-dimensional flat plane. Since this conversion inevitably introduces distortion, different projection methods choose to minimize distortion in one or more aspects such as area, shape, distance, or direction, at the expense of others. Therefore, selecting an appropriate map projection is crucial for accurately representing geographic information.

*B-MODEL’S ANSWER:* Map projection is a mathematical method for transforming the Earth's three-dimensional curved surface onto a two-dimensional flat plane.

*C-MODEL’S ANSWER:* Map projection is a systematic mathematical method for converting geographic coordinates from the Earth's surface into planar coordinates. Because the Earth's curved surface cannot be flattened into a plane without any distortion, all map projections introduce some form of inaccuracy. These distortions can manifest in terms of shape, area, distance, or direction.

Different map projections are designed to preserve specific properties or minimize certain types of distortion, depending on the map's intended use. For instance:

Conformal Projections: Preserve the accuracy of shapes, meaning that at any point on the map, directions are correct, but areas may be significantly distorted.

Equal-Area Projections: Preserve the accuracy of areas, meaning the proportional area of any region on the map matches its actual area on Earth, but shapes may be distorted.

Equidistant Projections: Preserve the accuracy of distances from one or two central points to all other points, but generally cannot simultaneously maintain true shapes and areas.

Azimuthal Projections: Preserve the accuracy of directions from a central point to all other points.

The choice of map projection is critical in GIS applications because it directly impacts the accuracy of spatial analysis, such as distance calculations, area measurements, and the analysis of spatial relationships between geographic features.

**Please compare the comprehensiveness, diversity, empowerment, and directness of the three responses, and then select the best response for each dimension.**

|  | A | B | C |
| --- | --- | --- | --- |
| Comprehensiveness | ○ | ○ | ○ |
| Diversity | ○ | ○ | ○ |
| Empowerment | ○ | ○ | ○ |
| Directness | ○ | ○ | ○ |

**16、Question 14：What is Spatial Autocorrelation and its importance to geographical problems? [Matrix Multiple Choice Question (Single Choice)]***

*A-MODEL’S ANSWER:* Spatial autocorrelation refers to the extent to which a phenomenon in a specific area is correlated with phenomena in surrounding areas. Positive spatial autocorrelation indicates that similar phenomena tend to cluster together, while negative spatial autocorrelation suggests that dissimilar phenomena are spatially separated. Its significance in geographic studies lies in its ability to help identify spatial patterns and distributions of phenomena, thereby optimizing resource allocation.

*B-MODEL’S ANSWER:* Spatial autocorrelation refers to the spatial correlation between phenomena within a geographic area. It helps us understand whether certain phenomena are distributed in a spatially patterned manner. Understanding this is valuable for the study of geographic issues.

*C-MODEL’S ANSWER:* Spatial autocorrelation refers to the correlation between the value of a phenomenon in a geographic space and the values of phenomena in its neighboring areas. Specifically, spatial autocorrelation can be categorized into positive and negative types. Positive spatial autocorrelation indicates that similar values tend to cluster together. For example, in certain areas, regions with high pollution concentrations are often adjacent to other areas with similarly high pollution levels. Negative spatial autocorrelation, on the other hand, implies that dissimilar values are spatially separated, such as different types of land use being distributed more dispersedly in space. Analyzing spatial autocorrelation is crucial for understanding the spatial distribution of geographic phenomena. By studying spatial autocorrelation, researchers can identify and explain the spatial patterns of certain phenomena, which is of significant importance for solving geographic problems. For example, in urban planning, by analyzing the land use patterns of different areas, policymakers can more effectively plan the layout of urban functional zones, ensuring the rational allocation of resources. In the field of public health, spatial autocorrelation analysis can reveal patterns of disease transmission, helping public health authorities implement more precise control measures. Furthermore, spatial autocorrelation analysis has broad applications in various fields such as environmental science, criminology, and socioeconomics. It aids researchers in identifying spatial hotspots or anomalous areas, providing strong data support for decision-making. Through spatial autocorrelation, researchers can not only uncover the spatial patterns of a phenomenon itself but also explore the interactions between different phenomena, revealing potential causal relationships. Therefore, spatial autocorrelation is not only an important tool in spatial data analysis but also a fundamental tool in multidisciplinary research.

**Please compare the comprehensiveness, diversity, empowerment, and directness of the three responses, and then select the best response for each dimension.**

|  | A | B | C |
| --- | --- | --- | --- |
| Comprehensiveness | ○ | ○ | ○ |
| Diversity | ○ | ○ | ○ |
| Empowerment | ○ | ○ | ○ |
| Directness | ○ | ○ | ○ |

***This is an attention check question, and all of its responses are generated by ChatGPT-4o.** **The results will only be used to screen out responses submitted by participants who did not answer attentively and will not be included in the final data analysis.**

**17、Question 15：What is Vectorization and Rasterization? (Single Choice)]**

*A-MODEL’S ANSWER:* Vectorization and rasterization are two key processes used to convert between different forms of geographic data.

### Vectorization

Vectorization converts raster data into vector format by identifying and outlining features or objects within the raster dataset. This process typically involves several steps:

1. **Raster to vector conversion**: Convert a raster layer into a vector layer using algorithms that detect edges, lines, and boundaries.

2. **Boundary extraction**: Extract the boundaries of each feature from the converted vector data.

3. **Feature creation**: Create separate features or polygons based on the extracted boundaries.

### Rasterization

Rasterization converts vector data into raster format by interpolating values between the vertices or edges of the vector data. This process involves:

1. **Vector to raster conversion**: Convert a vector layer into a raster layer using algorithms that interpolate values between the vertices.

2. **Grid creation**: Create a grid with specified cell size and resolution over which the interpolated values will be calculated.

3. **Interpolation**: Calculate the interpolated values for each cell in the grid based on the original vector data.

### Implications of Vectorization and Rasterization

1. **Loss or gain of detail**: Converting between formats can result in a loss or gain of detail, depending on the specific process used.

2. **Data accuracy**: The accuracy of the converted data depends on the quality of the original dataset and the effectiveness of the conversion algorithm.

3. **Processing time and memory usage**: Vectorization and rasterization require significant processing power and memory resources, especially for large datasets.

In summary, vectorization and rasterization are essential processes in geographic information systems (GIS) that allow users to convert between different data formats, each with its own advantages and limitations.

*B-MODEL’S ANSWER:* Vectorization is the process of converting raster lines into a vector format, involving line thinning, extraction, and topological reconstruction. On the other hand, Rasterization is the conversion of vector data to raster data, typically for display or storage purposes.

*C-MODEL’S ANSWER:* **Vectorization and Rasterization: A Comprehensive Overview**

Vectorization and rasterization are two fundamental processes used in Geographic Information Systems (GIS) and remote sensing applications to convert data between different formats. Understanding the differences between these two processes is crucial for efficient storage, manipulation, and analysis of spatial data.

### What is Vectorization?

Vectorization is the process of converting raster data into vector format. This involves extracting the spatial features from a raster dataset and representing them as geometric shapes, such as points, lines, or polygons. Vectorization is often preferred for detailed representation of geographic features, allowing for precise measurements and calculations [Data: Reports (1108)].

### What is Rasterization?

Rasterization is the process of converting vector data into raster format. This involves dividing the vector dataset into small cells or pixels to create a grid-based representation. Rasterization is more suitable for large-scale datasets, where precision is not critical, and visualization is the primary goal [Data: Reports (3, 4)].

### Key Points and Implications

* Vectorization preserves the spatial relationships between features, making it ideal for detailed representation of geographic features.

* Rasterization loses some of the precision and flexibility of the original vector data but provides a more suitable format for large-scale datasets and visualization purposes.

* Both vectorization and rasterization are essential processes in GIS and remote sensing applications, enabling efficient storage, manipulation, and analysis of spatial data [Data: Reports (5, 6)].

### Tools and Software

Various tools and software are available for vectorization and rasterization, including ArcGIS, QGIS, and GDAL. These tools provide a range of functionalities for data conversion, manipulation, and analysis [Data: Reports (14933)].

**Please compare the comprehensiveness, diversity, empowerment, and directness of the three responses, and then select the best response for each dimension.**

|  | A | B | C |
| --- | --- | --- | --- |
| Comprehensiveness | ○ | ○ | ○ |
| Diversity | ○ | ○ | ○ |
| Empowerment | ○ | ○ | ○ |
| Directness | ○ | ○ | ○ |

**18、Question 16：What is the location quotient in Spatial Crime Mapping? [Matrix Multiple Choice Question (Single Choice)]**

*A-MODEL’S ANSWER:* The Location Quotient (LQ) is a statistical measure used in spatial crime mapping to analyze and compare the relative concentration of crimes in different locations.

### Definition

The LQ measures the ratio of the number of crimes in a given area to the expected number of crimes based on the average rate for all areas. It provides an indication of whether a location has a higher or lower than average crime rate.

### Calculation

LQ = (Number of Crimes in Location / Total Number of Crimes) ÷ (Expected Number of Crimes in Location / Total Expected Number of Crimes)

Where:

* **Number of Crimes in Location** is the actual number of crimes reported in the specific location.

* **Total Number of Crimes** is the total number of crimes reported across all locations.

* **Expected Number of Crimes in Location** is the expected number of crimes based on the average rate for the location.

* **Total Expected Number of Crimes** is the total expected number of crimes based on the average rate for all locations.

### Interpretation

A value of LQ = 1 indicates that a location has an average crime rate compared to other areas. Values greater than 1 suggest higher than average crime rates, while values less than 1 indicate lower than average crime rates.

### Importance in Spatial Crime Mapping

The LQ is essential for identifying high-crime hotspots and understanding the spatial distribution of crimes. It helps law enforcement agencies:

* **Target resources**: Focus on areas with high crime concentrations to optimize resource allocation.

* **Develop prevention strategies**: Implement targeted interventions based on area-specific crime patterns.

* **Monitor crime trends**: Track changes in crime rates over time using LQ calculations.

By applying the Location Quotient, spatial crime mapping professionals can gain valuable insights into crime patterns and make informed decisions to improve public safety.

*B-MODEL’S ANSWER:* The location quotient is a geographical measure used in spatial criminology, which indicates the relative representation of a particular phenomenon within a sub-region compared to its overall distribution across the entire study area. It measures how much more or less likely a certain crime type occurs in a specific location compared to the regional average. If the location quotient equals one, it means that the occurrence of the crime is evenly distributed across the region. A value greater than one indicates over-representation, while a value less than one signifies under-representation.

*C-MODEL’S ANSWER:* ### Location Quotient in Spatial Crime Mapping ###

The location quotient (LQ) is a statistical tool used in spatial crime mapping to analyze the distribution of crimes across different locations and identify areas with unusual patterns or concentrations of crime. It allows researchers to compare the distribution of crimes across different areas and identify areas that are significantly higher or lower than expected.

### Calculating Location Quotient ###

The location quotient can be calculated using various methods, including the simple location quotient and the standardized location quotient. The choice of method depends on the specific research question and data available. The standardization method and z-score method are also used to calculate LQ.

### Limitations of Location Quotient ###

While the location quotient is a useful tool for spatial analysis, it has some limitations. For example, it does not take into account the size of the local area being studied, which can lead to biased results if the area is too small or too large. Additionally, LQ may not provide a complete picture of the underlying causes of crime and should be used in conjunction with other factors such as socioeconomic conditions, demographic characteristics, and environmental factors.

### Applications of Location Quotient ###

The location quotient is often used in conjunction with other spatial analysis techniques to identify hotspots and patterns of crime. It can be used to create maps that show the distribution of crime across different locations, allowing researchers to visualize and understand crime patterns more effectively. The LQ can also be used to identify areas that require targeted interventions or policing strategies.

### Conclusion ###

In conclusion, the location quotient is a useful tool for spatial analysis in crime mapping. It allows researchers to compare the distribution of crimes across different areas and identify areas with unusual patterns or concentrations of crime. While it has some limitations, the LQ can be used in conjunction with other factors to provide a more comprehensive understanding of crime patterns.

**Please compare the comprehensiveness, diversity, empowerment, and directness of the three responses, and then select the best response for each dimension.**

|  | A | B | C |
| --- | --- | --- | --- |
| Comprehensiveness | ○ | ○ | ○ |
| Diversity | ○ | ○ | ○ |
| Empowerment | ○ | ○ | ○ |
| Directness | ○ | ○ | ○ |

**19、Question 17：what is VIEWSHED ANALYSIS and what does The accuracy of viewshed analysis depend on? (Single Choice)]**

*A-MODEL’S ANSWER:* Viewshed Analysis is a technique used in geographic information systems (GIS) to determine which locations or areas can be seen from a given viewpoint, such as a building, mountain, or other elevated position.

### How Viewshed Analysis Works

1. **Obstacle data**: Identify the terrain features and buildings that could potentially obstruct the line of sight.

2. **Viewpoint data**: Define the location and elevation of the viewpoint from which to analyze visibility.

3. **Line-of-sight calculation**: Use spatial analysis algorithms to determine which locations are visible from the viewpoint, taking into account obstacles such as terrain features and buildings.

### Factors Influencing Viewshed Analysis

1. **Elevation data accuracy**: The quality of elevation data can significantly impact the accuracy of viewshed results.

2. **Obstacle data completeness**: Inclusion or exclusion of obstacles like trees, power lines, or other natural or man-made features can affect visibility.

3. **Viewpoint location and orientation**: Changes in viewpoint location or orientation can alter the line of sight and consequently the areas visible from that point.

### Accuracy Factors

The accuracy of viewshed analysis depends on several factors:

1. **Data resolution**: Higher-resolution data, such as LiDAR (Light Detection and Ranging) or orthophotos with high spatial resolution, improve the accuracy of the results.

2. **Vertical accuracy**: Small errors in elevation data can lead to significant inaccuracies in viewshed calculations.

3. **Horizontal accuracy**: Inaccuracies in horizontal coordinates can also affect the results.

To ensure accurate viewshed analysis results, it's essential to use high-quality data and carefully consider the input parameters, such as obstacle inclusion and viewpoint location.

*B-MODEL’S ANSWER:* According to the text, "VIEWSHED ANALYSIS" refers to an application that determines which areas can be seen from a given viewpoint.

The accuracy of Viewshed Analysis depends on its parameters and interpretation methods. There are two types of viewshed analysis - simple and cumulative. The choice between these two approaches affects the interpretation results, as demonstrated in a study by Mouﬂis et al. (2008).

*C-MODEL’S ANSWER:* **What is Viewshed Analysis?**

Viewshed analysis is a technique used to determine the area that is visible from a given location, taking into account the terrain and other factors. It is commonly used in various fields such as archaeology, urban planning, and military operations.

**Factors Affecting the Accuracy of Viewshed Analysis**

The accuracy of viewshed analysis depends on several factors:

### 1. **Software Used**

The software used to perform the analysis can significantly impact the results. Different GIS software packages may use different algorithms and techniques to calculate viewsheds, which can affect the accuracy of the results [Data: Reports (5, 6)].

### 2. **Input Data Quality**

The quality of the input data is crucial for accurate viewshed analysis. The accuracy of the coordinates and the precision of the measurements are essential to ensure reliable results [Data: Reports (7, +more)].

### 3. **Scale of Analysis**

The scale at which the analysis is performed can also affect the accuracy of the results. Viewshed analysis may need to be performed at different scales depending on the specific application or use case [Data: Reports (7, 8)].

### 4. **Advanced Techniques**

Using advanced techniques such as ray tracing or radiosity can provide more accurate results but may require significant computational resources [Data: Reports (8)].

### 5. **Assumptions and Limitations**

Users should carefully consider the assumptions and limitations of the method when interpreting results, as viewshed analysis has limitations and potential biases [Data: Reports (8, +more)].

**Additional Considerations**

While viewshed analysis is a powerful tool for analyzing visibility, it assumes a flat Earth and does not account for non-orthogonal viewing angles or complex terrain features [Data: Reports (8, +more)]. Therefore, users should be aware of these limitations when interpreting results.

**Please compare the comprehensiveness, diversity, empowerment, and directness of the three responses, and then select the best response for each dimension.**

|  | A | B | C |
| --- | --- | --- | --- |
| Comprehensiveness | ○ | ○ | ○ |
| Diversity | ○ | ○ | ○ |
| Empowerment | ○ | ○ | ○ |
| Directness | ○ | ○ | ○ |

**20、Question 18：How to work with file geodatabases in Arcmap? (Single Choice)]**

*A-MODEL’S ANSWER:* File Geodatabases are a type of database used by Esri's ArcGIS platform to store geographic data. Here's how to work with them in ArcMap:

### Creating a File Geodatabase

1. **Start ArcMap**: Open ArcMap and create a new project.

2. **Create a file geodatabase**: Click on "File" > "New" > "Database", then choose the location where you want to save the database.

### Adding Data to a File Geodatabase

1. **Connect to the geodatabase**: In the Catalog Tree, right-click on the geodatabase and select "Add Dataset".

2. **Import data**: Select the desired dataset (e.g., shapefile, Excel table) and choose the type of feature class or table you want to create.

3. **Specify properties**: Set the schema and other properties as needed.

### Working with Data in a File Geodatabase

1. **View and edit data**: Open the feature classes or tables within the geodatabase by double-clicking on them in the Catalog Tree.

2. **Query and analyze data**: Use ArcMap's various tools to query, spatially analyze, and visualize the data stored in the file geodatabase.

### Managing a File Geodatabase

1. **Backup and restore data**: Regularly back up your data by exporting it to a shapefile or other format, and restore it if needed.

2. **Compact and repair the database**: Periodically compact and repair the geodatabase using ArcGIS's built-in tools.

### Best Practices

* Keep your file geodatabases organized with meaningful names and clear folder structures.

* Regularly update your data to ensure accuracy and consistency.

* Consider using a enterprise geodatabase for large or complex projects.

By following these steps, you can effectively work with File Geodatabases in ArcMap and leverage their power to manage and analyze geographic data.

*B-MODEL’S ANSWER:* To work with file geodatabases in ArcMap, you can follow these steps:

1. Create a new file geodatabase using ArcCatalog or Catalog by right-clicking on the folder and selecting "New > File Geodatabase".

2. Populate the file geodatabase with feature classes, stand-alone tables, and other objects.

3. In ArcMap, add the file geodatabase as a connection to your project.

4. Use the tools in ArcMap to edit the data in the file geodatabase.

Note: File geodatabases are folders that can be used as a repository for GIS data, but they require ArcCatalog or Catalog to create and manage them.

*C-MODEL’S ANSWER:* **Working with File Geodatabases in ArcMap**

=============================================

File geodatabases are a type of database that can be used to store and manage geographic data in ArcGIS. They provide a flexible and scalable way to store and query spatial data, making them an ideal choice for many applications.

### Creating a New File Geodatabase

---------------------------------

To create a new file geodatabase, follow these steps:

1. Open ArcMap and click on "File" > "New" > "Geodatabase"

2. Choose the location where you want to save your file geodatabase

3. Give your file geodatabase a name and choose the type of database you want to create (e.g., personal, enterprise)

### Adding Data to a File Geodatabase

--------------------------------------

Once you have created a new file geodatabase, you can add data to it by following these steps:

1. Click on "Add Data" in the toolbar and select "Feature Dataset"

2. Navigate to the location of your feature dataset and select the features you want to add

3. Right-click on the feature dataset in the Catalog window and select "Register"

### Registering a File Geodatabase

---------------------------------

To register a file geodatabase, follow these steps:

1. Open ArcMap and click on "File" > "Catalog"

2. Navigate to the location of your file geodatabase

3. Right-click on the database in the Catalog window and select "Register"

### Working with Feature Datasets

---------------------------------

Feature datasets are a key component of file geodatabases, allowing you to store and manage multiple feature classes together.

* To add a new feature dataset to a file geodatabase, click on "Add Data" in the toolbar and select "Feature Dataset"

* To edit a feature dataset, right-click on it in the Catalog window and select "Edit"

### Tips for Working with File Geodatabases

------------------------------------------

When working with file geodatabases, keep the following tips in mind:

* Make sure to register your file geodatabase regularly to ensure that it is properly connected to ArcMap

* Use feature datasets to store and manage multiple feature classes together

* Take advantage of the scalability and flexibility of file geodatabases to store and query large amounts of spatial data

**Please compare the comprehensiveness, diversity, empowerment, and directness of the three responses, and then select the best response for each dimension.**

|  | A | B | C |
| --- | --- | --- | --- |
| Comprehensiveness | ○ | ○ | ○ |
| Diversity | ○ | ○ | ○ |
| Empowerment | ○ | ○ | ○ |
| Directness | ○ | ○ | ○ |

**21、Question 19：Introduce the GUI of QGIS to me. (Single Choice)]**

*A-MODEL’S ANSWER:* QGIS is an open-source Geographic Information System (GIS) that offers a user-friendly interface for working with geospatial data. Here's an overview of its main components:

### Main Interface

1. **Toolbar**: The top toolbar provides access to various tools and functions, such as file management, projection tools, and spatial analysis.

2. **Menu Bar**: The menu bar offers drop-down menus for tasks like editing, georeferencing, and layer management.

3. **Project Manager**: The project manager allows you to open and manage your projects, including the layers, styles, and maps.

4. **Canvas**: This is where the map display resides, showing the spatial data and its associated attributes.

### Panels

1. **Layer List Panel**: Displays a list of all layers in the project, allowing easy layer management.

2. **Properties Panel**: Provides access to layer properties, such as symbology, labeling, and SQL queries.

3. **Legend Panel**: Shows the legend for each layer, making it easier to understand the data.

4. **Attribute Table Panel**: Displays the attribute table for a selected feature class or table.

### Tools

1. **Tools Button**: Located at the top of the toolbar, this button provides access to various tools and functions.

2. **Ruler Tool**: A basic tool that allows you to measure distances and areas on the map.

3. **Rubber Band Tool**: Allows you to draw rectangles or polygons on the map for feature selection.

### Navigation

1. **Zoom Controls**: Located at the bottom of the screen, these controls allow you to zoom in and out of the map.

2. **Pan Button**: Enables you to pan the map by dragging it with your mouse.

3. **Full Extent Button**: Resets the view to show the entire extent of the data.

### Other Features

1. **Project Settings**: Allows you to set project-specific settings, such as projection and coordinate systems.

2. **Plugin Manager**: Enables you to install and manage QGIS plugins for enhanced functionality.

By navigating these components, you can efficiently work with geospatial data in QGIS and take advantage of its powerful features.

*B-MODEL’S ANSWER:* Unfortunately, the text provided does not describe the graphical user interface (GUI) of QGIS itself but rather compares it with ArcGIS and mentions its features.

However, I can tell you that QGIS is an open-source Geographic Information System (GIS) software that offers a variety of tools for data manipulation, analysis, and visualization. The GUI of QGIS is designed to be user-friendly and intuitive, allowing users to easily navigate and perform tasks such as:

* Creating and editing spatial layers

* Running various types of queries and analyses

* Visualizing data in different formats (e.g., raster, vector)

* Applying topology rules for editing point, line, and polygon layers

If you're interested in learning more about the GUI of QGIS, I can suggest some online resources such as the official QGIS documentation or tutorial videos that provide an overview of its interface and features.

*C-MODEL’S ANSWER:* **QGIS User Interface Overview**

=====================================

The QGIS user interface is designed to provide an intuitive and efficient way to work with geospatial data. The main components of the interface are:

* **Map View**: This is where you interact with your geospatial data, displaying maps, analyzing data, and creating visualizations.

* **Layer List**: This allows users to manage their layers, add new layers, and remove existing ones.

**Key Features**

----------------

The Map View offers various tools for interacting with your data:

* **Zooming**: You can zoom in or out of the map using the mouse wheel or by clicking on the zoom buttons.

* **Panning**: Use the mouse to drag the map and pan across it.

* **Layer Styling**: Customize the appearance of layers by adjusting their properties.

Additionally, QGIS supports plugins that extend its functionality and provide access to specialized tools and algorithms. You can browse and install plugins from the QGIS Plugin Repository.

**Implications**

----------------

The QGIS user interface is designed to be flexible and adaptable to your needs. By utilizing its various tools and plugins, you can efficiently work with geospatial data and create meaningful visualizations.

**Please compare the comprehensiveness, diversity, empowerment, and directness of the three responses, and then select the best response for each dimension.**

|  | A | B | C |
| --- | --- | --- | --- |
| Comprehensiveness | ○ | ○ | ○ |
| Diversity | ○ | ○ | ○ |
| Empowerment | ○ | ○ | ○ |
| Directness | ○ | ○ | ○ |

**22、Question 20：How to geocode data by zip code in Arcmap? [Matrix Multiple Choice Question (Single Choice)]**

*A-MODEL’S ANSWER:* Geocoding involves assigning geographic coordinates (latitude and longitude) to addresses or locations. Here's how to do it in ArcMap using the "Geocode Addresses" tool:

### Prerequisites

* **ArcGIS Desktop** version 10.x or later

* **ArcGIS Geocoding Service** or **World Geocoder**

### Step-by-Step Instructions

1. **Select Data**: Open your dataset in ArcMap and select the field that contains the zip codes you want to geocode.

2. **Geocode Addresses Tool**: In the "Analysis" toolbox, click on "Geocode Addresses" > "Geocode Addresses".

3. **Geocoding Service or World Geocoder**: Choose a geocoding service (e.g., ArcGIS Geocoding Service) or select the World Geocoder.

4. **Options**: Set the desired geocoding options, such as location tolerance and match accuracy.

5. **Run Tool**: Click "OK" to execute the tool.

### Results

The output will be a new feature class with the original address values and newly created fields for latitude and longitude coordinates. You can then use this data in various analyses or visualizations.

### Tips and Variations

* Use the "Geocode Addresses" tool in combination with other geospatial tools, such as spatial joins or buffering.

* Experiment with different geocoding services or world geocoders to optimize results.

* Consider using ArcGIS's built-in geocoding capabilities for smaller datasets.

By following these steps and leveraging ArcMap's geocoding functionality, you can efficiently convert zip codes into geographic coordinates.

*B-MODEL’S ANSWER:* To geocode data by zip code in ArcMap, follow these steps:

1. Open Tutorial8-1 from Chapter8\Tutorials and save the project as Tutorial8-1YourName.

2. Go to the Geocoding toolbar and click the Geocode Addresses button .

3. Select PAZipCodes and click OK.

4. In the Geocoding dialog box, select Single Field, choose ZIP_Code for the Complete ZIP Code field, and change the output name to "geocode_zip".

5. Make sure only Address and ZIP_Code are selected as necessary fields for geocoding, as you can look up city and state with the ZIP code.

6. Close the tables after reviewing them.

By following these steps, you will be able to geocode your data by zip code in ArcMap.

*C-MODEL’S ANSWER:* **Geocoding Data by Zip Code in ArcMap**

To geocode data by zip code in ArcMap, you will need to use the Geocoding tool or the Address Locator tool. The following steps provide a general overview of the process.

### Step 1: Prepare Your Data

Before geocoding your data, ensure that it is in a format compatible with ArcMap. You can use the Geocode Locations tool to geocode a list of locations using various methods, including address matching and reverse geocoding.

### Step 2: Choose Your Geocoding Method

You may choose between two primary methods for geocoding data by zip code:

* **Geocoding Tool**: This tool allows you to geocode a list of locations using various methods, including address matching and reverse geocoding.

* **Address Locator Tool**: This tool enables you to create a custom address locator that matches addresses with their corresponding locations. This can be useful for large datasets where accuracy is crucial.

### Step 3: Specify Input Data and Output Format

When using the Geocoding tool, specify the input data (addresses or zip codes) and the output format (e.g., points, polygons). You may also customize the geocoding process by specifying parameters such as the search radius and the maximum number of results.

### Step 4: Handle Errors and Exceptions

The Geocoding tool in ArcMap provides options for handling errors and exceptions during the geocoding process. You can specify how to handle unknown or ambiguous addresses, and customize the output format to suit your needs.

### Additional Considerations

* **Accuracy**: Geocoding data by zip code may not always result in accurate or precise locations, especially for rural areas or areas with complex street networks. You may need to use additional tools and techniques to improve the accuracy of your results.

* **Data Sources**: Consider using a local geodatabase or a geocoding service such as ArcGIS Online, which often have more up-to-date and accurate data than local geodatabases.

**Please compare the comprehensiveness, diversity, empowerment, and directness of the three responses, and then select the best response for each dimension.**

|  | A | B | C |
| --- | --- | --- | --- |
| Comprehensiveness | ○ | ○ | ○ |
| Diversity | ○ | ○ | ○ |
| Empowerment | ○ | ○ | ○ |
| Directness | ○ | ○ | ○ |

**23、Question 21：How to manage plugins in QGIS? (Single Choice)]**

*A-MODEL’S ANSWER:* QGIS provides a powerful plugin manager that allows you to easily install, update, and uninstall plugins. Here's how to manage plugins in QGIS:

### Installing Plugins

1. **Plugin Manager**: Open the Plugin Manager by navigating to "Settings" > "Plugins".

2. **Search Bar**: Search for your desired plugin using the search bar at the top of the Plugin Manager.

3. **Install**: Select the plugin you want to install and click the "Install" button.

### Updating Plugins

1. **Plugin Manager**: Open the Plugin Manager by navigating to "Settings" > "Plugins".

2. **Update Available**: If an update is available for any installed plugins, it will be listed in the Plugin Manager.

3. **Update**: Select the plugin you want to update and click the "Update" button.

### Uninstalling Plugins

1. **Plugin Manager**: Open the Plugin Manager by navigating to "Settings" > "Plugins".

2. **Uninstall**: Select the plugin you want to uninstall and click the "Uninstall" button.

3. **Confirm**: Confirm that you want to uninstall the plugin.

### Managing Plugin Settings

1. **Plugin Manager**: Open the Plugin Manager by navigating to "Settings" > "Plugins".

2. **Settings**: Click on the settings icon next to each installed plugin to manage its settings.

### Tips and Variations

* Use the "Browse Plugins" button in the Plugin Manager to explore available plugins.

* Consider using a repository manager like PyPI for QGIS plugins.

* Keep your QGIS installation up-to-date to ensure you have access to the latest plugins and features.

By following these steps, you can efficiently manage plugins in QGIS and take advantage of its extensive plugin ecosystem.

*B-MODEL’S ANSWER:* Unfortunately, the provided text does not mention how to manage plugins in QGIS. However, I can provide general information on managing plugins in QGIS:

To manage plugins in QGIS, you can follow these steps:

1. Open QGIS and go to **Plugins** > **Manage and Install Plugins...**

2. This will open the Plugin Manager dialog box.

3. From here, you can:

* Browse and install new plugins from the QGIS Plugin Repository.

* Update existing plugins.

* Disable or remove installed plugins.

Note: These steps may vary slightly depending on your version of QGIS.

*C-MODEL’S ANSWER:* **Managing Plugins in QGIS**

==========================

QGIS provides a range of built-in plugins for common tasks such as data visualization, geoprocessing, and spatial analysis. Users can also create their own custom plugins using Python or other programming languages.

### Installing Plugins ###

Plugins can be installed from the Plugin Manager, which is accessible through the Settings dialog. The Plugin Manager allows users to browse and install plugins from various repositories, including the QGIS Plugin Repository and user-created repositories.

**Caution:** When installing plugins from unknown sources, ensure that they are trusted repositories to avoid potential security risks [Data: Reports (2, 7, 34, 46, +more)].

### Updating Plugins ###

Regularly updating plugins is essential to ensure compatibility with the latest version of QGIS and to fix any security vulnerabilities. Users should regularly check for updates in the Plugin Manager and install them as needed.

**Recommendation:** Update plugins frequently to avoid potential issues [Data: Reports (1, 3)].

### Enabling and Disabling Plugins ###

Plugins can be enabled or disabled from the Plugins menu. This allows users to quickly switch between different plugins without having to uninstall and reinstall them.

### Configuring Plugin Settings ###

Some plugins may require configuration settings to function correctly. These settings can usually be accessed through the Settings dialog, where users can configure plugin options as needed.

**Note:** The availability of configuration settings will depend on the specific plugin being used [Data: Reports (3)].

### Removing Plugins ###

If a plugin is causing issues or conflicts, it can be removed from the Plugin Manager. However, this may require caution as removing a plugin can also remove its associated data and settings.

**Warning:** Be cautious when removing plugins to avoid losing important data and settings [Data: Reports (4)].

### Creating Custom Plugins ###

QGIS provides a range of tools and libraries for creating custom plugins using Python or other programming languages. Users can create their own custom plugins to extend the functionality of QGIS and perform specific tasks.

**Note:** Creating custom plugins requires programming knowledge and experience with QGIS [Data: Reports (+more)].

### Conclusion ###

Managing plugins in QGIS is a straightforward process that involves installing, updating, enabling, disabling, configuring, and removing plugins as needed. By following these steps, users can ensure that their plugins are up-to-date and functioning correctly, which will help to improve the overall performance and functionality of QGIS.

**Please compare the comprehensiveness, diversity, empowerment, and directness of the three responses, and then select the best response for each dimension.**

|  | A | B | C |
| --- | --- | --- | --- |
| Comprehensiveness | ○ | ○ | ○ |
| Diversity | ○ | ○ | ○ |
| Empowerment | ○ | ○ | ○ |
| Directness | ○ | ○ | ○ |

**24、Question 22：How to create charts in Arcgis Pro? (Single Choice)]**

*A-MODEL’S ANSWER:* ArcGIS Pro provides a variety of tools for creating charts, including 2D and 3D charts. Here's how to create charts in ArcGIS Pro:

### Creating a Chart

1. **Data**: Select the data you want to use for your chart.

2. **Chart Tool**: Click on the "Chart" tool under the "Analysis" toolbar or use the keyboard shortcut Ctrl+Shift+C.

3. **Chart Type**: Choose from various chart types, such as column charts, bar charts, and pie charts.

### Customizing a Chart

1. **Properties**: Right-click on the chart to access its properties.

2. **Appearance**: Customize the appearance of your chart by adjusting colors, labels, and other settings.

### Creating a 3D Chart

1. **3D Visualization**: Enable 3D visualization for your data in the attribute table or use the "3D" button in the chart tool.

2. **Chart Type**: Choose from various 3D chart types, such as 3D column charts and 3D bar charts.

### Tips and Variations

* Use the "Analysis" toolbar to access additional charting tools, such as statistical analysis and data manipulation.

* Consider using ArcGIS Pro's built-in templates for creating custom charts.

* Experiment with different chart types and customization options to find the best visualization for your data.

By following these steps, you can efficiently create and customize charts in ArcGIS Pro.

*B-MODEL’S ANSWER:* To create charts in ArcGIS Pro, you can use the built-in tools such as:

1. Histogram: To create a histogram, select the tool and choose the input data. The default output table name is automatically chosen by ArcGIS Pro, but you can override it if needed.

2. Normal QQ plot: This tool is used to visualize the normality of a distribution. Select the tool, choose the input data, and follow the wizard to create the plot.

3. Boxplots: To create boxplots, select the tool and choose the input data. The default output table name is automatically chosen by ArcGIS Pro, but you can override it if needed.

Additionally, you can use other tools such as Z-score rendering to further analyze your data.

To apply these settings and create charts:

1. Click on "Summary Statistics" in the main menu.

2. Type or make selections as shown (specific options are not provided).

3. Choose your project's file geodatabase (in this case, Chapter1.gdb) and name the output table (PopulationDensity_Statistics).

Note: The specific steps for creating charts may vary depending on the tool being used and the data you're working with.

It's also worth noting that ArcGIS Pro offers a range of visualization tools, including the Histogram, Normal QQ plot, Boxplots, Z-score rendering, and others. These can be accessed through the "Tools" menu or by using the "Analyze" tab in the ribbon.

*C-MODEL’S ANSWER:* **Creating Charts in ArcGIS Pro**

ArcGIS Pro provides a range of chart types, including bar charts, pie charts, scatter plots, and more [Data: Reports (16, 18)]. Users can choose the type of chart that best suits their needs and then customize it to fit their project's requirements.

To create a chart, users can use various tools and techniques. For example, they can use the Watershed Tool to calculate watershed areas, which are then used to create a chart [Data: Reports (14)]. Additionally, users can save their chart as a separate file or embed it in a map by going to the 'File' menu and selecting 'Save As' [Data: Reports (18)].

**Customizing Charts**

ArcGIS Pro also allows users to customize the appearance of their charts by using various formatting options, such as changing the colors, fonts, and sizes of the elements [Data: Reports (16)]. This can help users create charts that are visually appealing and easy to understand.

**Programmatic Chart Creation**

Users who want to programmatically create charts in ArcGIS Pro can use the ArcGIS Pro SDK. This requires some programming knowledge and experience with the ArcGIS Pro API [Data: Reports (31, 30)].

**Key Concepts and Entities**

IGHORHOOD OPERATIONS is a key concept in the community, and its importance is reflected in its combined degree with other entities [Data: Reports (27)]. OFFSETA and OFFSETB are related parameters in ArcGIS, which can be used to create charts. However, the community has limited relationships between entities, with only two connections mentioned in the data.

Note that there may be additional record IDs that are relevant to this topic.

**Please compare the comprehensiveness, diversity, empowerment, and directness of the three responses, and then select the best response for each dimension.**

|  | A | B | C |
| --- | --- | --- | --- |
| Comprehensiveness | ○ | ○ | ○ |
| Diversity | ○ | ○ | ○ |
| Empowerment | ○ | ○ | ○ |
| Directness | ○ | ○ | ○ |

**25、Question 23：How to creat a TIN surface in Arcgis Pro? (Single Choice)]**

*A-MODEL’S ANSWER:* A Triangulated Irregular Network (TIN) is a data structure used to represent 3D surfaces by breaking them down into triangular elements. Here's how to create a TIN surface in ArcGIS Pro:

### Creating a TIN Surface from Elevation Raster

1. **Elevation Raster**: Select the elevation raster that you want to use for creating the TIN surface.

2. **Create TIN Tool**: Click on the "Surface" tool under the "Analysis" toolbar or use the keyboard shortcut Ctrl+Shift+S.

3. **TIN Options**: Choose the desired TIN creation options, such as the number of triangles and the tolerance.

### Creating a TIN Surface from Feature Class

1. **Feature Class**: Select the feature class that you want to use for creating the TIN surface.

2. **Create TIN Tool**: Click on the "Surface" tool under the "Analysis" toolbar or use the keyboard shortcut Ctrl+Shift+S.

3. **TIN Options**: Choose the desired TIN creation options, such as the number of triangles and the tolerance.

### Customizing a TIN Surface

1. **Properties**: Right-click on the TIN surface to access its properties.

2. **Appearance**: Customize the appearance of your TIN surface by adjusting colors, labels, and other settings.

### Tips and Variations

* Use the "Surface" tool in combination with other 3D analysis tools for more advanced applications.

* Consider using ArcGIS Pro's built-in templates for creating custom surfaces.

* Experiment with different TIN creation options to find the best fit for your data.

*B-MODEL’S ANSWER:* To geocode data by zip code in ArcMap, follow these steps:

1. Open Tutorial8-1 from Chapter8\Tutorials and save the project as Tutorial8-1YourName.

2. Go to the Geocoding toolbar and click the Geocode Addresses button .

3. Select PAZipCodes and click OK.

4. In the Geocoding dialog box, select Single Field, choose ZIP_Code for the Complete ZIP Code field, and change the output name to "geocode_zip".

5. Make sure only Address and ZIP_Code are selected as necessary fields for geocoding, as you can look up city and state with the ZIP code.

6. Close the tables after reviewing them.

By following these steps, you will be able to geocode your data by zip code in ArcMap.

*C-MODEL’S ANSWER:* **Geocoding Data by Zip Code in ArcMap**

To geocode data by zip code in ArcMap, you will need to use the Geocoding tool or the Address Locator tool. The following steps provide a general overview of the process.

### Step 1: Prepare Your Data

Before geocoding your data, ensure that it is in a format compatible with ArcMap. You can use the Geocode Locations tool to geocode a list of locations using various methods, including address matching and reverse geocoding.

### Step 2: Choose Your Geocoding Method

You may choose between two primary methods for geocoding data by zip code:

* **Geocoding Tool**: This tool allows you to geocode a list of locations using various methods, including address matching and reverse geocoding.

* **Address Locator Tool**: This tool enables you to create a custom address locator that matches addresses with their corresponding locations. This can be useful for large datasets where accuracy is crucial.

### Step 3: Specify Input Data and Output Format

When using the Geocoding tool, specify the input data (addresses or zip codes) and the output format (e.g., points, polygons). You may also customize the geocoding process by specifying parameters such as the search radius and the maximum number of results.

### Step 4: Handle Errors and Exceptions

The Geocoding tool in ArcMap provides options for handling errors and exceptions during the geocoding process. You can specify how to handle unknown or ambiguous addresses, and customize the output format to suit your needs.

### Additional Considerations

* **Accuracy**: Geocoding data by zip code may not always result in accurate or precise locations, especially for rural areas or areas with complex street networks. You may need to use additional tools and techniques to improve the accuracy of your results.

* **Data Sources**: Consider using a local geodatabase or a geocoding service such as ArcGIS Online, which often have more up-to-date and accurate data than local geodatabases.

**Please compare the comprehensiveness, diversity, empowerment, and directness of the three responses, and then select the best response for each dimension.**

|  | A | B | C |
| --- | --- | --- | --- |
| Comprehensiveness | ○ | ○ | ○ |
| Diversity | ○ | ○ | ○ |
| Empowerment | ○ | ○ | ○ |
| Directness | ○ | ○ | ○ |
